# Supplementary material for: Pathogenic Genetic Variants From Highly Connected Cancer Susceptibility Genes Confer the Loss of Structural Stability
Source: Research Square preprint supplement (doi:10.21203/rs.3.rs-480522/v1), 2021-05-05
Supplement: Supplementary file 1 [file 099666b1a787cd09dcdb2e96.xlsx]

## Sheet: Sheet1
Here, T=Tolerated, D=Damaging/Deleterious, Pro-Damg=Probably damaging, Pos-Damg=Possibly damaging, B=Benign, N=Neutral
RS ID	Chromosome	Mutation position	SFT	Score	PolyPhen-2	Score	PROVEAN	Score
rs641252	11,108128319,A,C	S788R	T	0.328	B	0.068	N	-0.71
rs659243	11,108183167,G,A	Not found	Not found	Not found	Not found	Not found	Not found	Not found
rs659243	11,108183167,G,C	Not found	Not found	Not found	Not found	Not found	Not found	Not found
rs659243	11,108183167,G,T	Not found	Not found	Not found	Not found	Not found	Not found	Not found
rs1064815	11,108142064,A,T	Q1003L	T	0.399	Not found	Not found	N	-0.89
rs1800054	11,108098576,C,G	S49C	Damaging	0.003	Pro-Damg	0.98	N	-1.63
rs1800054	11,108098576,C,T	S49F	Damaging	0.003	Pos-Damg	0.813	N	-2.07
rs1800056	11,108138003,T,C	F858L	T	0.088	Pos-Damg	0.732	D	-2.57
rs1800057	11,108143456,C,A	P1054H	Damaging	0	Pro-Damg	1	D	-5.55
rs1800057	11,108143456,C,G	P1054R	Damaging	0	Pro-Damg	1	D	-5.61
rs1800058	11,108160350,C,T	L1420F	T	0.071	B	0.153	D	-2.54
rs1800059	11,108170506,A,C	S1691R	T	0.497	B	0.001	N	-0.69
rs1800060	11,108188136,G,A	V2079I	T	0.396	B	0.002	N	-0.31
rs1800061	11,108196837,G,A	G2287E	T	0.199	B	0.004	N	-0.94
rs1800061	11,108196837,G,C	G2287A	T	0.209	B	0.216	N	-0.85
rs1800558	11,108235926,G,A	E2990K	T	0.069	B	0.164	N	-1.4
rs1800558	11,108235926,G,T	Not found	Not found	Not found	Not found	Not found	Not found	Not found
rs1801516	11,108175462,G,A	D1853N	T	0.197	B	0.044	N	-1.31
rs1801673	11,108175463,A,T	D1853V	Damaging	0.006	Pos-Damg	0.881	D	-4.52
rs2227922	11,108123551,C,T	P604S	T	0.11	Pos-Damg	0.635	N	-2.17
rs2227924	11,108122592,C,G	L546V	Damaging	0.007	Pos-Damg	0.539	N	-1.41
rs2229020	11,108150316,A,G	Q1128R	Damaging	0.005	Pos-Damg	0.905	N	-1.99
rs2229021	11,108160371,G,A	A1427T	T	1	B	0.002	N	-0.83
rs2229022	11,108137925,C,A	R832S	T	0.4	B	0	N	0.14
rs2229022	11,108137925,C,G	R832G	T	0.327	B	0	N	-1.01
rs2229022	11,108137925,C,T	R832C	T	0.176	B	0	N	-0.84
rs2234997	11,108106443,T,A	D126E	T	0.46	B	0.001	N	-0.28
rs2234998	11,108106465,G,A	G134S	T	0.555	B	0.002	N	-0.55
rs2234998	11,108106465,G,C	G134R	T	0.113	Pos-Damg	0.487	N	-1.31
rs2234998	11,108106465,G,T	G134C	T	0.296	B	0	N	-0.63
rs2235000	11,108121733,G,A	G514D	T	0.376	Pro-Damg	0.997	N	-0.89
rs2235002	11,108114829,G,C	A216P	T	0.139	Pro-Damg	0.99	N	-1.71
rs2235002	11,108114829,G,T	A216S	T	0.342	Pos-Damg	0.879	N	-0.6
rs2235006	11:108122700,T,C	F582L	T	1	B	0	N	-0.53
rs2235011	11,108128238,A,G	T761A	T	0.216	B	0	N	-0.68
rs2235011	11,108128238,A,T	T761S	T	1	B	0	N	0.21
rs3092831	11,108198400,C,A	T2335K	T	0.052	B	0.372	N	-1.73
rs3092831	11,108198400,C,T	T2335I	T	0.08	B	0.004	N	-2.39
rs3092841	11,108155144,G,C	E1313Q	T	0.219	Pos-Damg	0.901	N	-1.09
rs3092849	11,108164051,G,T	L1541F	Damaging	0.005	Pro-Damg	0.998	D	-3.45
rs3092856	11,108159732,C,T	H1380Y	T	1	B	0	N	-1.06
rs3092857	11,108143299,A,G	M1040V	T	1	B	0	N	-0.14
rs3092907	11,108172382,G,C	V1729L	Damaging	0.012	Pos-Damg	0.74	N	-1.32
rs3092907	11,108172382,G,T	V1729F	Damaging	0.002	Pro-Damg	0.983	D	-3.26
rs3205809	11,108128217,C,A	Q754K	T	0.662	B	0.165	N	-0.42
rs3218670	11,108186743,G,A	R2034Q	T	0.1	Pro-Damg	0.999	N	-0.98
rs3218673	11,108138045,C,A	P872T	T	0.886	B	0.001	N	-0.37
rs3218673	11,108138045,C,T	P872S	T	1	B	0	N	-0.2
rs3218680	11,108205810,G,A	G2709S	Damaging	0	Pro-Damg	1	D	-5.18
rs3218680	11,108205810,G,T	G2709C	Damaging	0	Pro-Damg	1	D	-7.77
rs3218684	11,108098563,C,A	R45R	T	1	Not found	Not found	N	0
rs3218684	11,108098563,C,T	R45W	Damaging	0.002	Pro-Damg	0.996	D	-2.86
rs3218688	11,108139322,C,T	L942F	T	0.154	B	0.088	N	-0.86
rs3218695	11,108129778,C,A	D814E	T	0.932	B	0.412	N	-1
rs3218695	11,108129778,C,T	D814D	T	1	Not found	Not found	N	0
rs3218699	11,108196259,C,A	F2265L	T	0.376	B	0.03	N	-0.28
rs3218699	11,108196259,C,G	F2265L	T	0.376	B	0.03	N	-0.28
rs3218699	11,108196259,C,T	F2265F	T	0.463	Not found	Not found	N	0
rs3218707	11,108114727,G,C	V182L	T	0.074	B	0.002	N	-0.71
rs3218708	11,108139302,C,A	T935K	T	0.622	B	0.111	N	-1.36
rs3218708	11,108139302,C,G	T935R	T	0.388	B	0.001	N	-1.61
rs3218708	11,108139302,C,T	T935M	T	0.159	B	0.017	N	-0.77
rs4986761	11,108124761,T,C	S707P	T	0.234	B	0	N	-0.38
rs4988111	11,108198391,T,C	L2332P	T	0.29	B	0.005	N	-0.33
rs4988111	11,108198391,T,G	L2332R	T	0.526	B	0.12	N	-0.85
rs4988125	11,108203619,C,G	T2640S	T	0.635	B	0.002	N	0.02
rs4988125	11,108203619,C,T	T2640I	T	0.11	Pos-Damg	0.49	D	-2.71
rs11212587	11,108186610,G,A	G2023R	Damaging	0.003	Pro-Damg	1	D	-3.49
rs12786957	11,108151877,A,C	E1186D	T	0.379	B	0.002	N	-0.75
rs12786957	11,108151877,A,G	E1186E	T	1	Not found	Not found	N	0
rs12786957	11,108151877,A,T	E1186D	T	0.379	B	0.002	N	-0.75
rs12786960	11,108151882,A,C	H1188P	T	0.087	Pos-Damg	0.536	N	-2.11
rs12788429	11,108151801,T,C	V1161A	T	0.173	Pos-Damg	0.748	N	-2.07
rs12788429	11,108151801,T,G	V1161G	Damaging	0.001	Pos-Damg	0.955	D	-4.44
rs28904919	11,108117787,C,T	S333F	Damaging	0.008	Pos-Damg	0.612	N	-1.59
rs28904921	11,108199929,T,G	V2424G	Damaging	0.001	Pro-Damg	1	D	-4.76
rs28942103	11,108205715,A,G	Y2677C	Damaging	0	Pro-Damg	1	D	-7.43
rs34083085	11,108119732,T,A	Y380N	T	0.416	B	0.008	N	-1.85
rs34083085	11,108119732,T,C	Y380H	T	0.545	B	0	N	-1.06
rs34083085	11,108119732,T,G	Y380D	T	0.317	B	0	N	-2.24
rs34099398	11,108204684,A,G	M2667V	T	0.331	B	0.179	N	-1.34
rs34099398	11,108204684,A,T	M2667L	T	0.359	B	0.024	N	-0.37
rs34231402	11,108128246,T,A	F763L	T	0.372	B	0.003	N	-0.86
rs34640941	11,108160516,A,G	Y1475C	T	0.085	Pos-Damg	0.874	D	-3.03
rs35098825	11,108141841,G,A	M963I	T	0.499	B	0.013	N	-0.61
rs35118109	11,108196174,A,C	K2237T	T	0.143	Pro-Damg	0.97	N	-2.13
rs35118109	11,108196174,A,T	K2237M	Damaging	0.027	Pro-Damg	0.999	N	-2.18
rs35184530	11,108155170,G,A	M1321I	T	0.533	B	0.003	N	-0.71
rs35203200	11,108202273,G,A	V2540I	T	0.206	Pos-Damg	0.714	N	-0.56
rs35261362	11,108115718,T,C	I289T	Damaging	0.03	B	0.22	N	-1.84
rs35389822	11,108099921,A,G	I68V	T	0.288	B	0.001	N	-0.22
rs35556390	11,108172491,A,C	Q1765P	T	0.056	Pos-Damg	0.661	D	-3.19
rs35556390	11,108172491,A,G	Q1765R	T	0.109	B	0.215	N	-1.51
rs35813135	11,108139301,A,C	T935P	T	0.242	B	0.167	N	-1.71
rs35813135	11,108139301,A,G	T935A	T	0.699	B	0.001	N	-1.22
rs35813135	11,108139301,A,T	T935S	T	0.743	B	0.001	N	-0.75
rs35858242	11,108106544,C,T	S160F	Damaging	0.006	Pos-Damg	0.681	N	-2.25
rs35962982	11,108164196,C,T	L1590F	Damaging	0	Pro-Damg	0.999	D	-3.73
rs35963548	11,108121787,G,A	C532Y	Damaging	0.001	Pro-Damg	1	D	-3.84
rs35963548	11,108121787,G,T	C532F	Damaging	0.002	Pro-Damg	0.999	D	-3.56
rs45481995	11,108196260,A,C	K2266Q	T	0.49	B	0.008	N	-0.5
rs55633650	11,108106483,G,C	D140H	Damaging	0.004	Pro-Damg	0.999	D	-2.65
rs55633650	11,108106483,G,T	D140Y	Damaging	0.002	Pro-Damg	1	D	-2.99
rs55723361	11,108139268,C,A	R924R	T	1	Not found	Not found	N	0
rs55723361	11,108139268,C,T	R924W	Damaging	0.001	Pro-Damg	1	D	-3.82
rs55798854	11,108218029,G,A	D2870N	Damaging	0	Pro-Damg	1	D	-4.31
rs55801750	11,108201023,T,C	C2464R	T	0.609	Pos-Damg	0.838	D	-3
rs55830714	11,108126976,G,A	R720H	T	0.114	Pos-Damg	0.519	N	-0.65
rs55843558	11,108168035,T,C	M1644T	Damaging	0.019	B	0.062	N	-2.37
rs55859590	11,108159738,C,T	P1382S	T	0.397	B	0.209	N	-0.39
rs55870064	11,108168053,A,C	N1650T	T	0.438	B	0	N	-0.68
rs55870064	11,108168053,A,G	N1650S	T	1	B	0	N	0.02
rs55982963	11,108206576,G,A	R2719H	Damaging	0.006	Pro-Damg	0.998	D	-2.93
rs55982963	11,108206576,G,T	R2719L	Damaging	0.007	Pro-Damg	0.992	D	-4.34
rs56009889	11,108196896,C,G	L2307V	T	0.277	Pos-Damg	0.649	N	-0.52
rs56009889	11,108196896,C,T	L2307F	Damaging	0.017	Pro-Damg	0.999	N	-2.46
rs56087610	11,108139296,C,G	S933C	Damaging	0.041	B	0.343	N	-1.51
rs56123940	11,108115601,G,A	R250Q	T	0.278	B	0.01	N	-0.74
rs56128736	11,108119823,T,C	V410A	Damaging	0.004	B	0.434	N	-1.75
rs56252953	11,108126944,T,C	I709I	T	0.612	Not found	Not found	N	0
rs56252953	11,108126944,T,G	I709M	T	0.143	B	0.168	N	-0.56
rs56354559	11,108165748,A,G	H1624R	T	0.292	B	0.083	N	-1.16
rs56365018	11,108121703,A,G	N504S	T	0.675	B	0.002	N	0.33
rs56399311	11,108181006,A,G	Y1961C	Damaging	0.001	Pro-Damg	1	D	-4.74
rs56399857	11,108201108,T,G	L2492R	Damaging	0.003	Pro-Damg	1	D	-4.53
rs56815840	11,108190770,G,C	S2146T	T	1	B	0	N	0
rs56887719	11,108224541,C,A	P2907H	Damaging	0	Pro-Damg	1	D	-7.76
rs56887719	11,108224541,C,G	P2907R	Damaging	0	Pro-Damg	1	D	-7.76
rs56887719	11,108224541,C,T	P2907L	Damaging	0	Pro-Damg	1	D	-8.62
rs61734354	11,108138039,A,G	N870D	T	0.186	B	0	N	-1.36
rs79075295	11,108114749,G,A	R189K	Damaging	0	Pro-Damg	1	N	-1.02
rs79075295	11,108114749,G,C	R189T	Damaging	0	Pro-Damg	1	N	-2.14
rs79220522	11,108121428,G,T	W412C	Damaging	0	Pro-Damg	0.999	D	-6.89
rs79431304	11,108143485,A,G	M1064V	T	0.075	B	0	N	-1.03
rs79431304	11,108143485,A,T	M1064L	T	0.097	B	0.003	N	-0.93
rs112357985	11,108129770,A,G	M812V	T	0.066	B	0.04	N	-0.62
rs113482790	11,108139179,A,G	D894G	Damaging	0.008	Pro-Damg	0.981	D	-2.64
rs113482790	11,108139179,A,T	D894V	Damaging	0.003	Pro-Damg	0.995	D	-3.89
rs121434216	11,108216531,T,G	F2827C	Damaging	0	Pro-Damg	1	D	-5.03
rs121434217	11,108170479,G,C	D1682H	Damaging	0.003	Pro-Damg	1	D	-5.88
rs121434218	11,108204652,T,C	L2656P	Damaging	0.002	Pro-Damg	1	D	-4.84
rs121434218	11,108204652,T,G	L2656R	Damaging	0.002	Pro-Damg	1	D	-4.48
rs121434220	11,108200960,C,G	R2443G	Damaging	0.013	Pro-Damg	1	D	-4.77
rs121434220	11,108200960,C,T	Not found	Not found	Not found	Not found	Not found	Not found	Not found
rs121434221	11,108199926,A,G	E2423G	Damaging	0.008	Pro-Damg	1	D	-3.41
rs137882485	11,108100014,A,G	S99G	T	0.057	Pro-Damg	0.997	N	-1.56
rs138048269	11,108203535,G,A	R2612K	T	1	B	0	N	0.58
rs138166710	11,108192061,C,A	S2162R	Damaging	0.005	Pro-Damg	0.99	D	-4.26
rs138166710	11,108192061,C,G	S2162R	Damaging	0.005	Pro-Damg	0.99	D	-4.26
rs138166710	11,108192061,C,T	S2162S	T	1	Not found	Not found	N	0
rs138212452	11,108153488,A,G	M1210V	T	0.223	B	0.011	N	-0.67
rs138327406	11,108160480,T,G	F1463C	Damaging	0.001	Pro-Damg	1	D	-6.24
rs138398778	11,108117798,C,A	R337S	Damaging	0.003	Pro-Damg	1	D	-2.66
rs138398778	11,108117798,C,T	R337C	Damaging	0	Pro-Damg	1	D	-3.78
rs138468963	11,108139196,A,G	M900V	T	1	B	0.001	N	-0.3
rs138526014	11,108206575,C,T	R2719C	Damaging	0.001	Pro-Damg	1	D	-5.2
rs138710254	11,108175466,C,G	T1854R	T	0.182	B	0.29	N	-0.95
rs138710254	11,108175466,C,T	T1854I	T	0.117	B	0.001	N	-0.88
rs138828590	11,108192118,G,T	E2181D	Damaging	0.011	Pro-Damg	1	D	-2.65
rs138941496	11,108203492,C,G	R2598G	Damaging	0.006	Pro-Damg	1	D	-4.93
rs138941496	11,108203492,C,T	Not found	Not found	Not found	Not found	Not found	Not found	Not found
rs139316519	11,108139177,A,G	Q893Q	T	1	Not found	Not found	N	0
rs139316519	11,108139177,A,T	Q893H	Damaging	0.016	B	0.005	N	-1.98
rs139379666	11,108235879,C,T	P2974L	T	0.056	B	0.002	D	-2.51
rs139552233	11,108141988,T,C	S978P	Damaging	0.004	Pro-Damg	1	D	-2.74
rs139770721	11,108186638,G,A	R2032K	Damaging	0.018	Pro-Damg	0.994	D	-2.61
rs139893395	11,108142072,A,G	M1006V	T	0.874	B	0	N	-0.1
rs140263969	11,108203493,G,A	R2598Q	Damaging	0.009	Pro-Damg	0.998	D	-2.82
rs140263969	11,108203493,G,T	R2598L	T	0.075	Pro-Damg	0.984	D	-4.1
rs140856217	11,108164137,T,C	V1570A	T	0.761	B	0	N	-0.55
rs140882609	11,108123596,A,C	N619H	Damaging	0.048	B	0.003	N	-1.87
rs141054982	11,108137937,G,A	E836K	T	0.335	B	0	N	-1.09
rs141087784	11,108159742,C,A	Not found	Not found	Not found	Not found	Not found	Not found	Not found
rs141087784	11,108159742,C,T	S1383L	Damaging	0.002	Pro-Damg	1	D	-3.79
rs141175037	11,108124585,T,C	V648A	T	0.179	B	0	N	-1.65
rs141329176	11,108163470,G,C	V1521L	T	0.129	B	0.084	N	-2.12
rs141460670	11,108151836,T,C	L1173L	T	1	Not found	Not found	N	0
rs141460670	11,108151836,T,G	L1173V	T	0.107	Pos-Damg	0.929	N	-1.74
rs141534716	11,108216609,C,G	T2853R	Damaging	0	Pro-Damg	1	D	-4.67
rs141534716	11,108216609,C,T	T2853M	Damaging	0	Pro-Damg	1	D	-4.14
rs141586345	11,108098388,C,G	R13G	T	0.478	Pos-Damg	0.768	N	-1.59
rs141586345	11,108098388,C,T	R13C	T	0.133	B	0.342	N	-1.91
rs141921797	11,108158415,A,G	Q1361R	T	0.401	B	0.012	N	-0.66
rs141947469	11,108139239,A,G	N914S	T	0.494	B	0	N	-0.83
rs142317485	11,108117735,T,A	Y316N	Damaging	0	Pro-Damg	0.998	D	-5.37
rs142317485	11,108117735,T,C	Y316H	Damaging	0	Pro-Damg	0.998	D	-2.78
rs142322668	11,108235941,C,A	L2995I	T	0.319	B	0.019	N	-0.37
rs142358238	11,108100039,G,A	C107Y	T	0.075	B	0.002	N	-2.21
rs142358238	11,108100039,G,T	C107F	T	0.098	B	0.005	N	-2.25
rs142455912	11,108170524,A,G	T1697A	T	0.823	B	0.001	N	-0.66
rs142591268	11,108119680,A,G	R362R	T	1	Not found	Not found	N	0
rs142591268	11,108119680,A,T	R362S	T	0.099	B	0.1	N	-1.09
rs142766756	11,108153499,T,C	H1213H	T	1	Not found	Not found	N	0
rs142766756	11,108153499,T,G	H1213Q	Damaging	0	Pro-Damg	1	D	-4.5
rs143198946	11,108115568,T,C	F239S	Damaging	0	Pro-Damg	1	D	-3.23
rs143577586	11,108178677,C,A	L1910I	Damaging	0	Pro-Damg	0.998	N	-1.81
rs144338238	11,108168084,C,A	N1660K	Damaging	0.034	Pos-Damg	0.768	D	-2.54
rs144338238	11,108168084,C,T	N1660N	T	1	Not found	Not found	N	0
rs144497088	11,108198432,G,A	A2346T	Damaging	0.003	Pro-Damg	1	D	-3.36
rs144535256	11,108155171,C,A	L1322I	T	0.141	Pro-Damg	0.991	N	-1.04
rs144535256	11,108155171,C,T	L1322F	Damaging	0.007	Pro-Damg	0.999	D	-2.51
rs144636562	11,108236072,A,G	N3003S	Damaging	0.011	Pro-Damg	1	D	-4.07
rs144761622	11,108186818,C,A	T2059K	Damaging	0.006	Pos-Damg	0.867	D	-2.58
rs144761622	11,108186818,C,T	T2059I	Damaging	0.008	Pro-Damg	0.982	D	-2.9
rs145053092	11,108115522,A,G	K224E	Damaging	0.008	Pro-Damg	0.962	N	-1.5
rs145119475	11,108158393,C,A	P1354T	T	0.396	B	0.001	N	-2.01
rs145355104	11,108114842,C,T	A220V	T	0.517	B	0.406	N	-0.23
rs145453814	11,108170491,A,G	I1686V	T	0.146	Pos-Damg	0.68	N	-0.52
rs145513717	11,108138037,C,A	A869E	T	0.133	B	0.049	N	-0.35
rs145513717	11,108138037,C,G	A869G	T	0.123	B	0.049	N	-0.89
rs145513717	11,108138037,C,T	A869V	T	0.11	B	0.059	N	-1.09
rs145629926	11,108122702,C,G	F582L	T	1	B	0	N	-0.53
rs145629926	11,108122702,C,T	F582F	T	0.407	B		N	0
rs145667735	11,108160467,G,A	G1459R	Damaging	0.003	Pro-Damg	0.999	D	-4.33
rs145812395	11,108173749,T,C	M1830T	Damaging	0.01	B	0.231	N	-2.46
rs145847315	11,108186631,A,G	I2030V	T	0.395	B	0	N	-0.27
rs146017595	11,108155013,A,G	K1269R	T	0.069	Pro-Damg	0.968	N	-1.61
rs146069748	11,108202186,A,T	I2511F	Damaging	0.003	Pro-Damg	1	D	-3.41
rs146145357	11,108141983,T,C	V976A	Damaging	0.043	B	0.02	N	-2.01
rs146243469	11,108192112,T,G	I2179M	Damaging	0.012	Pro-Damg	0.962	N	-1.38
rs146382972	11,108106399,G,A	A112T	Damaging	0.019	Pos-Damg	0.87	N	-1.24
rs146531614	11,108142070,A,G	N1005S	T	0.806	B	0	N	-0.46
rs147009251	11,108098516,A,C	K29T	T	0.164	B	0.002	N	-1.42
rs147112946	11,108150261,G,A	A1110T	T	0.143	B	0.138	N	0.08
rs147122522	11,108139187,T,A	F897I	T	0.271	B	0.009	N	-0.26
rs147122522	11,108139187,T,C	F897L	T	1	B	0	N	0.04
rs147187700	11,108180945,G,C	V1941L	T	0.093	Pos-Damg	0.816	N	-1.51
rs147187700	11,108180945,G,T	V1941F	Damaging	0.004	Pro-Damg	1	D	-3.62
rs147472613	11,108121463,C,A	P424H	Damaging	0	Pro-Damg	1	D	-6.22
rs147472613	11,108121463,C,T	P424L	Damaging	0	Pro-Damg	1	D	-6.87
rs147515380	11,108126966,C,A	R717R	T	1	B		N	0
rs147515380	11,108126966,C,T	R717W	Damaging	0.002	Pro-Damg	0.995	D	-3.15
rs147557621	11,108150237,G,A	G1102R	T	0.408	B	0	N	-0.13
rs147600485	11,108158399,A,G	N1356D	T	0.944	B	0	N	-0.34
rs147604227	11,108200946,C,G	T2438R	T	0.052	Pro-Damg	0.998	N	-1.93
rs147604227	11,108200946,C,T	T2438I	T	0.575	Pos-Damg	0.854	N	-1.32
rs147695170	11,108235923,C,G	Q2989E	T	0.734	B	0.281	N	-0.58
rs147915571	11,108114793,G,A	G204R	T	0.478	Pos-Damg	0.914	N	-1.78
rs147934285	11,108124738,A,G	E699G	Damaging	0.022	Pos-Damg	0.919	D	-3
rs148061139	11,108098524,C,T	R32C	Damaging	0.001	Pro-Damg	0.998	N	-2.47
rs148064985	11,108178702,G,C	R1918T	T	0.343	B	0.098	N	-0.59
rs148191382	11,108123629,G,A	V630M	T	0.097	Pos-Damg	0.661	N	-0.16
rs148191382	11,108123629,G,C	V630L	T	0.438	B	0	N	-0.36
rs148432863	11,108198384,C,G	L2330V	T	0.324	Pos-Damg	0.649	N	-0.77
rs148590073	11,108106435,A,G	I124V	T	0.999	B	0.001	N	-0.11
rs148705269	11,108128232,A,G	S759G	T	0.149	Pos-Damg	0.722	N	-1.57
rs148949644	11,108199932,G,T	G2425V	Damaging	0.009	Pro-Damg	0.998	D	-3.62
rs148993589	11,108160454,A,C	K1454N	T	0.053	B	0.265	N	-1.97
rs149116878	11,108115565,T,C	I238T	Damaging	0.003	B	0.22	N	-1.39
rs149362482	11,108175489,C,T	L1862F	T	0.065	Pro-Damg	0.997	D	-2.92
rs149569091	11,108173692,G,A	C1811Y	Damaging	0.03	Pro-Damg	0.98	D	-4.84
rs149569091	11,108173692,G,C	C1811S	T	0.446	B	0.013	D	-3.08
rs149636614	11,108119667,A,G	N358S	T	0.74	B	0	N	-0.85
rs149711770	11,108155132,G,A	A1309T	T	0.118	B	0.009	N	-0.7
rs149827260	11,108199832,C,T	R2392W	Damaging	0.003	Pro-Damg	1	D	-6.81
rs149911447	11,108143535,C,A	D1080E	Damaging	0	Pro-Damg	1	N	-2.21
rs150143957	11,108098561,A,G	D44G	Damaging	0.011	Pro-Damg	0.996	D	-3.11
rs150355232	11,108203508,A,G	N2603S	T	0.59	B	0.001	N	-0.53
rs150408832	11,108192050,T,C	C2159R	Damaging	0.007	Pos-Damg	0.922	D	-3.99
rs150408832	11,108192050,T,G	C2159G	T	0.055	Pos-Damg	0.629	D	-4.75
rs150503164	11,108198394,C,A	T2333K	Damaging	0.004	B	0.005	N	-0.68
rs150503164	11,108198394,C,T	T2333I	T	1	B	0	N	1.47
rs150661813	11,108106477,G,A	G138R	Damaging	0	Pos-Damg	0.878	D	-3.09
rs150757822	11,108183194,A,C	K1992T	T	0.054	Pos-Damg	0.73	D	-2.67
rs150757822	11,108183194,A,G	K1992R	T	0.32	Pos-Damg	0.482	N	-1.18
rs151327241	11,108172475,A,G	M1760V	T	0.139	B	0.008	N	-1.46
rs151327241	11,108172475,A,T	M1760L	T	0.791	B	0	N	-0.24
rs183263185	11,108155106,A,G	Y1300C	T	0.13	B	0.002	D	-2.75
rs183531638	11,108170591,A,C	N1719T	Damaging	0.011	Pro-Damg	0.992	N	-2.21
rs183531638	11,108170591,A,G	N1719S	T	0.107	Pos-Damg	0.92	N	-1.39
rs183532834	11,108153554,T,C	S1232P	T	0.188	Pos-Damg	0.731	N	-2.07
rs183532834	11,108153554,T,G	S1232A	T	0.436	B	0.049	N	-1.17
rs189445371	11,108150232,C,T	T1100M	T	0.526	B	0.002	N	-0.61
rs193302874	11,108199886,T,C	F2410L	Damaging	0.008	Pro-Damg	0.999	D	-5.37
rs199586999	11,108186568,T,C	Y2009H	Damaging	0	Pro-Damg	1	D	-4.43
rs199635238	11,108142048,G,A	V998M	Damaging	0.012	Pos-Damg	0.498	N	-0.87
rs199836342	11,108170498,T,C	I1688T	Damaging	0.004	B	0.102	D	-2.66
rs199869975	11,108119674,T,C	D360D	T	1	B		N	0
rs199869975	11,108119674,T,G	D360E	Damaging	0.047	Pos-Damg	0.457	N	-0.97
rs199875915	11,108137926,G,A	R832H	T	0.54	B	0	N	-0.68
rs199875915	11,108137926,G,C	R832P	T	0.203	B	0.005	N	-0.73
rs199875915	11,108137926,G,T	R832L	T	0.647	B	0	N	0.06
rs199883473	11,108143576,A,G	N1094S	T	1	B	0	N	-0.6
rs199885813	11,108173695,C,T	A1812V	T	0.108	B	0.074	N	-1.92
rs199915459	11:108202716,A,C	R2580S	T	0.132	B	0.001	N	-0.98
rs199954262	11,108129732,C,T	A799V	T	1	B	0	N	-0.52
rs200124136	11,108123578,G,T	V613L	Damaging	0.031	Pro-Damg	0.996	N	-1.24
rs200151849	11,108099994,A,C	K92T	T	0.176	Pro-Damg	1	N	-1.47
rs200381392	11,108122659,G,A	R568K	T	0.807	B	0.004	N	-0.71
rs200381392	11,108122659,G,T	R568I	T	0.09	B	0.116	N	-1.79
rs200431631	11,108192078,C,G	S2168W	Damaging	0.002	Pro-Damg	1	D	-4.63
rs200431631	11,108192078,C,T	S2168L	Damaging	0.007	Pro-Damg	0.998	D	-3.49
rs200441272	11,108202171,A,G	R2506G	T	0.239	B	0	N	-1.59
rs200601781	11,108117810,G,A	V341I	T	0.189	B	0.174	N	0.07
rs200765255	11,108151824,G,A	E1169K	Damaging	0	Pro-Damg	1	N	-2.42
rs200842502	11,108175456,C,G	L1851V	Damaging	0.031	Pro-Damg	0.997	N	-1.21
rs200842502	11,108175456,C,T	L1851F	Damaging	0.009	Pro-Damg	1	N	-1.99
rs200899512	11,108235853,G,C	L2965F	Damaging	0.031	Pro-Damg	0.992	N	-1.91
rs200899512	11,108235853,G,T	L2965F	Damaging	0.031	Pro-Damg	0.992	N	-1.91
rs200940211	11,108196951,C,T	A2325V	T	0.484	B	0.031	N	-0.33
rs201159454	11,108114752,T,A	I190K	Damaging	0.011	Pro-Damg	0.995	N	-1.92
rs201199629	11,108236150,G,A	G3029D	Damaging	0.006	B	0.011	N	-2.01
rs201199629	11,108236150,G,T	G3029V	Damaging	0.01	Pos-Damg	0.848	D	-3.41
rs201216427	11,108213950,T,G	V2757G	Damaging	0	Pro-Damg	1	D	-6.03
rs201277352	11,108163354,G,A	C1482Y	T	1	B	0	N	-0.36
rs201277352	11,108163354,G,C	C1482S	T	0.82	B	0	N	-0.16
rs201314561	11,108201014,C,A	R2461S	Damaging	0.043	Pro-Damg	0.994	N	-1.13
rs201314561	11,108201014,C,T	R2461C	Damaging	0.004	Pro-Damg	1	D	-3.61
rs201356803	11,108160384,A,G	N1431S	T	0.221	Pos-Damg	0.553	N	-1.75
rs201594549	11,108163375,G,A	R1489H	Damaging	0.048	Pro-Damg	0.999	N	-1.86
rs201594549	11,108163375,G,T	R1489L	Damaging	0.014	Pro-Damg	0.995	D	-2.95
rs201666889	11,108160416,T,C	Y1442H	Damaging	0	Pro-Damg	1	D	-4.12
rs201719927	11,108121543,C,T	R451C	T	0.064	Pro-Damg	1	N	-2.17
rs201762714	11,108124663,A,G	H674R	T	0.419	B	0	N	-0.87
rs201762714	11,108124663,A,T	H674L	T	0.662	B	0	N	-1.58
rs201773026	11,108098555,A,G	H42R	T	0.353	B	0.032	N	-0.79
rs201780199	11,108143551,C,G	R1086G	T	0.172	Pos-Damg	0.577	D	-4.35
rs201780199	11,108143551,C,T	R1086C	T	0.185	B	0.042	D	-3.7
rs201793499	11,108129722,A,C	N796H	T	0.128	Pro-Damg	0.985	N	-1.19
rs201793499	11,108129722,A,T	N796Y	T	0.107	Pos-Damg	0.602	N	-1.73
rs201909756	11,108129764,A,G	K810E	T	0.189	Pos-Damg	0.737	N	-0.71
rs201958469	11,108216611,C,T	R2854C	Damaging	0	Pro-Damg	1	D	-6.39
rs201963507	11,108181014,A,G	K1964E	T	0.291	B	0.053	N	-0.63
rs202028401	11,108175535,T,A	F1877Y	T	1	B	0.059	N	-0.74
rs202028401	11,108175535,T,C	F1877S	T	0.414	B	0	N	-1.43
rs202028401	11,108175535,T,G	F1877C	T	0.179	B	0.348	N	-1.83
rs202144949	11,108122604,A,G	I550V	T	1	B	0	N	0.25
rs202160435	11,108117799,G,A	R337H	Damaging	0.004	Pro-Damg	1	N	-2.43
rs202173660	11,108121636,A,C	K482Q	T	0.103	Pos-Damg	0.651	N	-0.69
rs202206540	11,108186796,G,A	E2052K	T	0.053	Pro-Damg	0.994	N	-2.49
rs202208861	11,108117691,G,A	G301D	Damaging	0.003	Pro-Damg	0.999	D	-3.52
rs202208861	11,108117691,G,T	G301V	Damaging	0.004	Pro-Damg	0.995	D	-3.37
rs267606669	11,108203576,G,C	A2626P	Damaging	0	Pro-Damg	1	D	-4.32
rs367603277	11,108153555,C,G	S1232C	T	0.108	Pos-Damg	0.911	D	-2.66
rs367603277	11,108153555,C,T	S1232F	T	0.377	B	0.181	D	-2.84
rs368047468	11,108139214,T,A	L906M	T	0.225	B	0.002	N	-0.17
rs368047468	11,108139214,T,C	L906L	T	0.578	B		N	0
rs368111672	11,108143537,A,G	N1081S	T	1	B	0	N	0.55
rs368161489	11,108098525,G,A	R32H	T	0.072	B	0.022	N	-1.33
rs368161489	11,108098525,G,T	R32L	Damaging	0.014	Pos-Damg	0.768	N	-2.11
rs368209025	11,108122641,A,C	N562T	T	0.239	B	0.001	N	-1.05
rs368209025	11,108122641,A,G	N562S	T	0.849	B	0	N	-0.31
rs368209025	11,108122641,A,T	N562I	Damaging	0.028	B	0.09	D	-2.54
rs368666328	11,108218017,C,G	L2866V	T	0.897	B	0.279	N	-0.72
rs368666328	11,108218017,C,T	L2866F	Damaging	0.029	Pro-Damg	0.998	D	-2.78
rs368830730	11,108164131,A,G	H1568R	T	0.348	B	0.029	N	-1.43
rs368879876	11,108121555,G,A	V455M	Damaging	0.003	Pro-Damg	0.999	N	-1.4
rs369203092	11,108117844,T,C	I352T	Damaging	0.004	Pos-Damg	0.546	N	-2.41
rs369349023	11,108186621,G,A	M2026I	Damaging	0.031	B	0.019	N	-1.05
rs369351803	11,108173597,A,T	R1779S	T	0.69	B	0.007	N	-0.75
rs369846067	11,108203526,T,C	I2609T	Damaging	0.005	B	0.381	D	-2.51
rs369870357	11,108236183,T,C	I3040T	Damaging	0.043	B	0.016	N	0.2
rs369903995	11,108160494,G,A	V1468I	T	0.351	B	0.091	N	-0.05
rs370152402	11,108216530,T,A	F2827I	Damaging	0	Pro-Damg	0.999	D	-3.07
rs370240037	11,108121632,A,C	L480F	Damaging	0.026	Pro-Damg	1	N	-1.89
rs370240037	11,108121632,A,T	L480F	Damaging	0.026	Pro-Damg	1	N	-1.89
rs370269552	11,108138061,G,C	S877T	T	0.323	B	0	N	-1.1
rs370282831	11,108143470,G,A	A1059T	T	0.235	B	0.084	N	-0.76
rs370282831	11,108143470,G,T	A1059S	T	0.156	B	0.021	N	-0.43
rs370559102	11,108199845,C,G	T2396S	T	0.265	B	0.095	N	-0.19
rs370567994	11,108199902,C,G	A2415G	T	0.101	Pos-Damg	0.878	N	-2.3
rs370567994	11,108199902,C,T	A2415V	T	0.059	Pos-Damg	0.927	N	-2.39
rs370574283	11,108163410,G,A	V1501I	T	0.176	Pos-Damg	0.689	N	-0.1
rs370574283	11,108163410,G,T	V1501F	Damaging	0.002	Pro-Damg	0.996	N	-2.34
rs370602633	11,108151884,C,G	L1189V	T	0.122	B	0.38	N	-1.1
rs370602633	11,108151884,C,T	L1189F	Damaging	0.027	B	0.047	N	-2.41
rs370680798	11,108178642,G,A	R1898Q	T	0.456	B	0.013	N	-0.41
rs370680798	11,108178642,G,T	R1898L	T	0.161	B	0.001	N	-2.08
rs370785959	11,108155048,A,T	S1281C	Damaging	0.033	B	0.001	D	-2.92
rs370974808	11,108153536,G,C	D1226H	Damaging	0.007	Pos-Damg	0.888	N	-2.2
rs371526361	11,108155000,T,C	F1265L	T	0.27	Pos-Damg	0.533	N	-1.51
rs371526361	11,108155000,T,G	F1265V	Damaging	0.024	Pos-Damg	0.858	D	-2.51
rs371619067	11,108235818,T,C	Y2954H	Damaging	0	Pro-Damg	0.999	D	-4.1
rs371638537	11,108206686,A,C	K2756Q	Damaging	0	Pro-Damg	1	D	-3.45
rs371638537	11,108206686,A,G	K2756E	Damaging	0	Pro-Damg	1	D	-3.45
rs371713984	11,108117837,G,A	A350T	Damaging	0	Pro-Damg	1	N	-1.53
rs371713984	11,108117837,G,C	A350P	Damaging	0	Pro-Damg	1	D	-2.53
rs371767164	11,108236230,G,C	V3056L	T	0.258	Pos-Damg	0.937	N	0.04
rs371767164	11,108236230,G,T	V3056L	T	0.258	Pos-Damg	0.937	N	0.04
rs372230498	11,108137911,A,G	K827R	T	0.687	B	0	N	-0.72
rs372334891	11,108122678,A,C	E574D	T	0.162	B	0.06	N	-1.01
rs372334891	11,108122678,A,G	E574E	T	1	B		N	0
rs372694758	11,108114701,G,T	R173M	T	0.223	B	0.343	N	-1.34
rs372766122	11:108151807,C,A	S1163Y	T	1	B	0	N	-0.52
rs372838622	11,108186836,T,C	I2065T	Damaging	0.011	Pos-Damg	0.868	N	-2.04
rs372966951	11,108150228,G,A	D1099N	T	0.282	B	0.002	N	-0.58
rs372966951	11,108150228,G,T	D1099Y	Damaging	0.009	B	0.331	N	-2.07
rs373147078	11,108203602,T,G	D2634E	T	0.138	Pro-Damg	0.966	N	-1.49
rs373213507	11,108178644,T,A	C1899S	T	0.504	B	0	N	-0.69
rs373213507	11,108178644,T,C	C1899R	T	0.072	B	0.001	N	-1.86
rs373225328	11,108142013,T,C	V986A	Damaging	0.006	Pro-Damg	0.962	N	-2.12
rs373226793	11,108160462,T,C	L1457S	Damaging	0.001	Pro-Damg	0.996	D	-4.34
rs373789346	11,108172386,G,A	R1730Q	T	0.321	Pro-Damg	1	N	-1.92
rs373789346	11,108172386,G,T	R1730L	T	0.453	Pro-Damg	0.988	D	-2.53
rs374353016	11,108141839,A,G	M963V	T	1	B	0	N	-0.51
rs374551964	11,108192126,G,C	S2184T	Damaging	0.045	B	0.109	N	-1.36
rs374876799	11,108202207,C,T	P2518S	Damaging	0	Pro-Damg	1	D	-6.23
rs375049090	11,108117838,C,T	A350V	Damaging	0	Pro-Damg	1	N	-1.28
rs375091571	11,108128227,G,A	G757E	Damaging	0.024	Pro-Damg	0.995	N	-2.24
rs375091571	11,108128227,G,T	G757V	Damaging	0.039	Pro-Damg	0.995	N	-2.12
rs375131360	11,108170444,C,T	A1670V	Damaging	0.019	Pro-Damg	1	N	-2.39
rs375190373	11,108165669,C,A	L1598I	Damaging	0.016	Pro-Damg	0.986	N	-1.46
rs375396787	11,108159778,A,G	N139S5	T	0.525	B	0	N	-1.23
rs375605135	11,108099985,C,T	S89F	Damaging	0.003	Pos-Damg	0.658	N	-1.38
rs375654664	11,108163468,T,C	I1520T	Damaging	0.002	Pro-Damg	0.998	D	-3.71
rs375754332	11,108122587,T,C	L544S	Damaging	0.018	B	0.181	N	-2.28
rs375783941	11,108186583,G,A	E2014K	Damaging	0	Pro-Damg	1	D	-3.56
rs375783941	11,108186583,G,C	E2014Q	Damaging	0	Pro-Damg	1	D	-2.62
rs375798802	11,108114709,C,A	L176M	T	0.1	Pos-Damg	0.811	N	-0.26
rs375798802	11,108114709,C,G	L176V	T	0.174	B	0.018	N	-0.86
rs375798802	11,108114709,C,T	L176L	T	1	B		N	0
rs376159946	11,108199780,A,C	E2374D	T	0.587	B	0	N	-0.94
rs376165779	11,108160471,C,T	A1460V	T	0.186	Pos-Damg	0.567	N	-1.34
rs376169886	11,108180977,C,A	H1951Q	Damaging	0.003	Pro-Damg	1	D	-5.67
rs376169886	11,108180977,C,T	H1951H	T	1	B		N	0
rs376196220	11,108121453,T,C	S421P	Damaging	0.011	Pro-Damg	0.964	N	-1.95
rs376521407	11,108186821,G,A	R2060H	T	0.053	Pos-Damg	0.885	N	-1.82
rs376521407	11,108186821,G,C	R2060P	T	0.065	Pro-Damg	0.997	D	-2.58
rs376521407	11,108186821,G,T	R2060L	T	0.096	B	0.05	N	-1.89
rs376524155	11,108235864,A,G	Y2969C	Damaging	0.026	Pro-Damg	0.998	D	-3.21
rs376524625	11:108153448,A,G	K1196K	T	1	B		N	0
rs376524625	11,108153448,A,T	K1196N	T	0.233	B	0.112	N	-0.86
rs376529329	11,108115561,A,G	T237A	T	0.448	B	0	N	-1.26
rs376676328	11,108224555,A,G	R2912G	Damaging	0	Pro-Damg	1	D	-5.83
rs376824528	11,108203516,A,G	I2606V	T	0.271	B	0.065	N	-0.67
rs376898203	11,108188156,T,A	D2085E	T	1	B	0.001	N	0.15
rs377065665	11,108160421,C,A	H1443Q	T	0.21	B	0.38	N	-2.22
rs377244521	11,108142057,C,G	L1001V	Damaging	0	Pro-Damg	1	N	-1.47
rs377289524	11,108178699,G,A	R1917K	Damaging	0	Pro-Damg	0.999	D	-2.88
rs377289524	11,108178699,G,C	R1917T	Damaging	0	Pro-Damg	0.982	D	-5.46
rs377349886	11,108151863,G,C	E1182Q	Damaging	0.038	Pos-Damg	0.79	N	-1.3
rs377595814	11,108163386,C,G	L1493V	T	0.096	Pos-Damg	0.456	N	-1.45
rs377595814	11,108163386,C,T	L1493F	T	0.086	Pos-Damg	0.895	N	-2.33
rs377597949	11,108121656,G,T	W488C	Damaging	0.003	Pos-Damg	0.653	D	-8.49
rs377648506	11,108204673,T,C	V2663A	T	0.556	B	0.002	N	-0.73
rs397514577	11,108188101,C,A	A2067D	Damaging	0.002	Pro-Damg	1	D	-3.53
rs527471560	11,108160457,T,A	S1455R	T	0.069	Pos-Damg	0.682	N	-1.69
rs528165789	11,108124602,C,A	Q654K	T	0.49	B	0	N	-0.41
rs529202615	11,108117828,G,C	E347Q	Damaging	0.013	B	0.307	N	-1.18
rs529296539	11,108216546,G,A	R2832H	T	0.221	Pos-Damg	0.77	N	1.04
rs529296539	11,108216546,G,C	R2832P	Damaging	0.006	Pro-Damg	1	D	-3.86
rs529296539	11,108216546,G,T	R2832L	Damaging	0.006	Pro-Damg	1	D	-4.3
rs531617441	11,108201135,A,G	N2501S	T	0.118	Pro-Damg	0.966	D	-3.19
rs531980488	11,108205756,C,G	R2691G	Damaging	0.011	Pos-Damg	0.922	D	-2.52
rs531980488	11,108205756,C,T	R2691C	Damaging	0.002	Pro-Damg	0.999	D	-3.58
rs533129312	11,108123588,C,G	T616S	Damaging	0.035	B	0.071	N	-1.6
rs533129312	11,108123588,C,T	T616I	T	0.226	B	0.006	N	-1.94
rs534864280	11,108155041,C,A	D1278E	T	0.074	Pro-Damg	0.996	N	-2.06
rs534864280	11,108155041,C,T	D1278D	T	1	B		N	0
rs534914490	11,108214052,A,G	Y2791C	Damaging	0.001	Pro-Damg	1	D	-7.29
rs535646511	11,108141869,C,G	L973V	Damaging	0.02	Pro-Damg	0.986	N	-1.32
rs535646511	11,108141869,C,T	L973L	T	1	B		N	0
rs536609092	11,108124758,T,C	S706P	T	0.059	B	0.002	N	-1.81
rs536609092	11,108124758,T,G	S706A	T	0.146	B	0.001	N	-1.13
rs537377433	11,108164067,A,G	I1547V	T	0.34	B	0.076	N	-0.36
rs537377433	11,108164067,A,T	I1547L	Damaging	0.026	Pos-Damg	0.75	N	-1.42
rs538105098	11,108141873,C,A	S974Y	Damaging	0.016	Pos-Damg	0.94	N	-2.45
rs538105098	11,108141873,C,G	S974C	Damaging	0.017	Pro-Damg	0.983	N	-2.29
rs538105098	11,108141873,C,T	S974F	Damaging	0.016	Pos-Damg	0.848	D	-2.63
rs538452060	11,108175517,C,T	T1871I	Damaging	0.008	Pro-Damg	0.968	D	-2.69
rs539676759	11,108160506,T,G	L1472V	Damaging	0.006	Pro-Damg	0.994	N	-2.33
rs539847847	11,108150286,C,T	T1118I	T	0.054	B	0.222	N	-1.7
rs540172506	11,108236070,C,A	F3002L	T	0.569	B	0	N	-0.62
rs540172506	11,108236070,C,G	F3002L	T	0.569	B	0	N	-0.62
rs540172506	11,108236070,C,T	F3002F	T	1	B		N	0
rs540920248	11,108099917,A,G	K66K	T	1	B		N	0
rs540920248	11,108099917,A,T	K66N	T	0.066	Pos-Damg	0.919	N	-1.04
rs542378165	11,108178675,T,A	M1909K	Damaging	0.001	Pro-Damg	0.997	D	-5.23
rs542378165	11,108178675,T,C	M1909T	Damaging	0.002	Pro-Damg	0.989	D	-4.83
rs542378165	11,108178675,T,G	M1909R	Damaging	0.001	Pro-Damg	0.997	D	-5.33
rs543980602	11,108183164,A,G	Q1982R	Damaging	0.003	Pro-Damg	0.975	N	-2.43
rs543980602	11,108183164,A,T	Q1982L	Damaging	0.002	Pro-Damg	0.987	D	-3.8
rs544123518	11,108124678,G,C	G679A	T	0.646	B	0.156	N	-0.33
rs544123518	11,108124678,G,T	G679V	T	0.177	B	0.309	N	-1
rs544891616	11,108160398,C,T	H1436Y	Damaging	0.013	Pos-Damg	0.859	D	-2.83
rs545873723	11,108196134,A,C	M2224L	T	1	B	0.006	N	0.35
rs545873723	11,108196134,A,G	M2224V	Damaging	0.016	Pos-Damg	0.562	N	-1.69
rs546087885	11,108123621,T,G	F627C	T	0.094	Pos-Damg	0.948	N	-2.28
rs546621356	11,108121487,T,A	L432Q	Damaging	0.002	Pro-Damg	1	D	-2.7
rs547045780	11,108114832,A,G	I217V	T	0.136	B	0	N	-0.34
rs547045780	11,108114832,A,T	I217F	Damaging	0.034	B	0.242	N	-0.96
rs547082881	11,108106475,A,T	Y137F	T	0.25	Pos-Damg	0.824	N	-1
rs547400704	11,108151839,T,G	F1174V	Damaging	0	Pro-Damg	1	D	-4.01
rs550552791	11,108164152,G,A	R1575H	Damaging	0.003	Pro-Damg	1	D	-3.11
rs551411717	11,108213968,G,A	R2763Q	T	0.1	Pro-Damg	0.994	D	-2.68
rs552010421	11,108137929,G,A	G833E	T	0.278	B	0.003	N	-1.17
rs552010421	11,108137929,G,C	G833A	T	0.235	B	0.001	N	-0.68
rs554805703	11,108121544,G,A	R451H	Damaging	0.021	Pro-Damg	1	N	-1.67
rs555219189	11,108151768,G,C	R1150T	Damaging	0.005	Pro-Damg	0.994	D	-3.14
rs556598169	11,108138066,A,G	I879V	T	1	B	0	N	-0.06
rs559676197	11,108142044,T,G	H996Q	T	0.389	B	0.13	N	-0.51
rs560691658	11,108119698,A,C	Q368H	Damaging	0.002	Pro-Damg	0.999	N	-1.67
rs560691658	11,108119698,A,G	Q368Q	T	1	B		N	0
rs560691658	11,108119698,A,T	Q368H	Damaging	0.002	Pro-Damg	0.999	N	-1.67
rs562445932	11,108160356,A,G	I1422V	T	0.364	B	0.013	N	-0.68
rs562445932	11,108160356,A,T	I1422L	T	0.887	B	0.001	N	0.15
rs564652222	11,108196143,C,A	R2227S	Damaging	0	Pro-Damg	1	D	-5.83
rs564652222	11,108196143,C,T	R2227C	Damaging	0	Pro-Damg	1	D	-7.68
rs565622131	11,108126975,C,A	R720S	T	1	B	0	N	0.4
rs565622131	11,108126975,C,T	R720C	T	0.235	B	0	N	-0.25
rs565886680	11,108139329,T,G	L944R	Damaging	0.001	Pro-Damg	1	D	-3.44
rs567060474	11,108196797,G,A	A2274T	Damaging	0.005	Pro-Damg	1	D	-2.69
rs567060474	11,108196797,G,T	A2274S	Damaging	0.008	Pro-Damg	1	N	-1.82
rs567344545	11,108151797,G,A	V1160M	T	0.313	B	0.027	N	-0.13
rs567344545	11,108151797,G,C	V1160L	T	0.058	B	0.022	N	-0.71
rs567457294	11,108199857,G,A	R2400K	T	0.534	Pos-Damg	0.529	N	-0.78
rs567457294	11,108199857,G,T	R2400I	T	0.129	Pos-Damg	0.472	D	-3.41
rs568451087	11,108155126,G,A	G1307R	T	0.722	B	0.158	N	0.51
rs568461905	11,108143318,T,C	L1046P	Damaging	0.003	Pro-Damg	0.983	D	-4.31
rs571989748	11,108160523,C,A	N1477K	Damaging	0.047	Pos-Damg	0.704	N	-1.47
rs571989748	11,108160523,C,G	N1477K	Damaging	0.047	Pos-Damg	0.704	N	-1.47
rs571989748	11,108160523,C,T	N1477N	T	1	B		N	0
rs572564322	11,108150285,A,G	T1118A	T	0.149	B	0.003	N	-1.19
rs573290117	11,108188239,C,G	T2113S	T	0.832	B	0	N	-0.02
rs574458765	11,108121748,T,C	V519A	T	0.458	B	0.001	N	-0.31
rs576884305	11,108153461,T,A	F1201I	T	0.078	Pos-Damg	0.584	N	-0.58
rs587776551	11,108151895,G,A	K1192K	T	1	B		N	0
rs587776551	11,108151895,G,T	K1192N	Damaging	0	Pro-Damg	1	D	-3.47
rs587778065	11,108128310,C,T	R785C	T	0.055	Pos-Damg	0.579	N	-0.79
rs587778066	11,108128293,T,C	M779T	Damaging	0.008	B	0.029	N	-1.51
rs587778067	11,108129785,G,A	D817N	Damaging	0.005	Pro-Damg	0.997	N	-2.14
rs587778067	11,108129785,G,C	D817H	Damaging	0.002	Pro-Damg	1	D	-3.19
rs587778069	11,108141825,A,G	E958G	Damaging	0.028	B	0.049	N	-1.87
rs587778069	11,108141825,A,T	E958V	T	0.111	B	0.005	D	-2.52
rs587778070	11,108142100,A,G	Q1015R	T	0.562	B	0.003	N	-0.22
rs587778071	11,108143320,A,G	K1047E	T	0.476	B	0.012	N	-0.5
rs587778072	11,108150229,A,G	D1099G	T	0.06	B	0.124	N	-2.27
rs587778073	11,108153490,G,A	M1210I	T	0.178	B	0.091	N	-0.47
rs587778073	11,108153490,G,T	M1210I	T	0.178	B	0.091	N	-0.47
rs587778074	11,108155159,G,T	V1318F	Damaging	0.004	Pro-Damg	1	D	-2.59
rs587778075	11,108164086,A,C	E1553A	T	0.271	B	0.004	N	-1.54
rs587778075	11,108164086,A,G	E1553G	T	0.116	B	0.138	N	-1.78
rs587778078	11,108186820,C,A	R2060S	T	0.123	Pos-Damg	0.944	N	-1.6
rs587778078	11,108186820,C,T	R2060C	Damaging	0.02	Pos-Damg	0.885	N	-2.37
rs587778079	11,108202733,A,G	N2586S	T	0.487	B	0	N	-0.87
rs587778080	11,108216596,C,A	R2849R	T	1	B		N	0
rs587778080	11,108216596,C,G	R2849G	Damaging	0	Pro-Damg	1	D	-5.63
rs587779811	11,108119726,A,G	S378G	T	0.448	B	0	N	-0.99
rs587779812	11,108119828,T,C	W412R	Damaging	0	Pro-Damg	1	D	-7.47
rs587779814	11,108121502,T,C	M437T	T	0.806	B	0	N	-0.33
rs587779816	11,108121708,G,T	G506C	Damaging	0.008	Pos-Damg	0.938	N	-2.03
rs587779819	11,108128226,G,A	G757R	Damaging	0.021	Pro-Damg	0.997	N	-2.35
rs587779820	11,108128290,A,G	N778S	T	0.929	B	0	N	-0.8
rs587779821	11,108129786,A,G	D817G	Damaging	0.004	Pos-Damg	0.618	D	-2.99
rs587779821	11,108129786,A,T	D817V	Damaging	0.001	Pro-Damg	0.995	D	-3.67
rs587779823	11,108137970,A,G	M847V	T	0.09	B	0	N	-1.34
rs587779823	11,108137970,A,T	M847L	Damaging	0.031	B	0.011	N	-1.16
rs587779824	11,108137995,T,C	M855T	T	0.142	B	0	N	-1.12
rs587779825	11,108138009,G,C	D860H	Damaging	0.008	Pro-Damg	0.993	D	-3.3
rs587779825	11,108138009,G,A	D860N	Damaging	0.034	Pos-Damg	0.934	N	-2.31
rs587779827	11,108141792,A,G	Y947C	Damaging	0.001	Pro-Damg	1	D	-3.97
rs587779828	11,108141831,C,A	P960H	T	0.482	B	0.011	N	-2.03
rs587779828	11,108141831,C,T	P960L	T	1	B		N	-2.29
rs587779830	11,108142000,C,T	R982C	Damaging	0.001	Pro-Damg	1	D	-3.9
rs587779831	11,108142039,C,A	L995I	T	0.108	B	0.018	N	-0.93
rs587779831	11,108142039,C,G	L995V	T	0.251	B	0.004	N	-1.09
rs587779831	11,108142039,C,T	L995F	Damaging	0.028	Pos-Damg	0.679	N	-1.79
rs587779832	11,108150264,C,G	L1111V	Damaging	0.025	Pos-Damg	0.931	N	-1.04
rs587779835	11,108106447,G,A	V128M	T	0.2	B	0.008	N	-0.27
rs587779837	11,108158420,A,G	T1363A	T	0.324	B	0.028	N	-0.57
rs587779838	11,108159795,T,A	L1401I	T	0.399	B	0.015	N	-0.49
rs587779839	11,108160415,A,C	I1441I	T	1	B		N	0
rs587779839	11,108160415,A,G	I1441M	T	0.447	B	0.009	N	0.28
rs587779839	11,108160415,A,T	I1441I	T	1	B		N	0
rs587779840	11,108160512,C,A	H1474N	Damaging	0.012	Pro-Damg	0.998	D	-4.92
rs587779840	11,108160512,C,G	H1474D	Damaging	0.008	Pro-Damg	0.998	D	-6.92
rs587779841	11,108163515,A,G	K1536E	T	1	B	0	N	-0.2
rs587779842	11,108114681,A,C	E166D	T	0.43	B	0	N	-0.66
rs587779842	11,108114681,A,G	E166E	T	1	B		N	0
rs587779842	11,108114681,A,T	E166D	T	0.43	B	0	N	-0.66
rs587779843	11,108114689,C,G	S169C	Damaging	0.047	B	0.343	N	-1.49
rs587779843	11,108114689,C,T	S169F	Damaging	0.048	B	0.035	N	-1.69
rs587779844	11,108172425,C,G	T1743R	Damaging	0.003	Pro-Damg	1	D	-4.01
rs587779844	11,108172425,C,T	T1743I	Damaging	0.009	Pro-Damg	1	D	-4.26
rs587779845	11,108172447,G,C	W1750C	Damaging	0.002	Pro-Damg	1	D	-4.44
rs587779845	11,108172447,G,T	W1750C	Damaging	0.002	Pro-Damg	1	D	-4.44
rs587779848	11,108173613,C,G	P1785A	T	1	B	0	N	0.08
rs587779849	11,108175441,A,G	I1846V	T	0.678	B	0.077	N	-0.26
rs587779850	11,108175558,A,G	T1885A	Damaging	0.036	Pro-Damg	0.964	N	-2.27
rs587779850	11,108175558,A,T	T1885S	T	0.068	Pro-Damg	0.992	N	-1.79
rs587779853	11,108186802,G,T	A2054S	T	0.974	B	0	N	1.33
rs587779854	11,108188133,T,C	S2078P	Damaging	0.019	Pro-Damg	0.998	D	-3.03
rs587779855	11,108188140,A,G	Y2080C	T	0.06	Pro-Damg	0.999	D	-5.5
rs587779857	11,108196800,A,C	I2275L	T	0.489	B	0.001	N	0.29
rs587779857	11,108196800,A,G	I2275V	T	0.402	B	0.002	N	-0.64
rs587779858	11,108098419,G,A	R23Q	Damaging	0	Pro-Damg	1	N	-1.8
rs587779860	11,108198474,T,C	Y2360H	Damaging	0	Pro-Damg	1	D	-4.58
rs587779861	11,108199839,C,T	S2394L	Damaging	0.004	Pro-Damg	0.999	D	-3.57
rs587779862	11,108200984,G,C	A2451P	T	0.099	Pro-Damg	1	N	-1.83
rs587779862	11,108200984,G,T	A2451S	T	0.148	Pos-Damg	0.926	N	-0.52
rs587779863	11,108200987,C,G	L2452V	T	0.211	B	0.416	N	-1.12
rs587779863	11,108200987,C,T	L2452L	T	1	Not found	Not found	N	0
rs587779864	11,108201083,G,A	V2484I	T	0.369	B	0.042	N	-0.25
rs587779864	11,108201083,G,T	V2484L	Damaging	0.014	Pos-Damg	0.707	N	-2.06
rs587779867	11,108202754,A,G	Q2593R	T	0.308	B	0.215	N	-1.42
rs587779868	11,108203597,T,G	L2633V	T	0.177	B	0.009	N	-1.17
rs587779870	11,108205798,G,A	V2705I	T	0.5	B	0.001	N	-0.3
rs587779870	11,108205798,G,T	V2705L	T	0.298	B	0.001	N	-1.12
rs587779871	11,108206681,C,T	T2754I	T	0.064	Pro-Damg	0.99	D	-4.16
rs587779872	11,108216545,C,T	R2832C	Damaging	0.001	Pro-Damg	1	D	-4.76
rs587779873	11,108218015,T,C	I2865T	Damaging	0.003	Pro-Damg	1	D	-3.91
rs587779874	11,108218089,C,A	L2890I	Damaging	0.011	Pro-Damg	1	N	-1.12
rs587779874	11,108218089,C,G	L2890V	Damaging	0.006	Pro-Damg	1	N	-1.99
rs587779874	11,108218089,C,T	L2890L	T	1	Not found	Not found	N	0
rs587779875	11,108225548,A,G	K2933E	Damaging	0	Pro-Damg	0.986	D	-2.51
rs587779876	11,108115748,A,G	E299G	T	0.059	B	0.001	D	-2.58
rs587779877	11,108236158,G,A	V3032M	Damaging	0	Pro-Damg	1	N	-2.45
rs587779877	11,108236158,G,C	V3032L	Damaging	0	Pro-Damg	1	D	-2.55
rs587780613	11,108121767,G,A	K525K	T	1	Not found	Not found	N	0
rs587780613	11,108121767,G,C	K525N	Damaging	0.004	Pro-Damg	1	D	-2.8
rs587780613	11,108121767,G,T	K525N	Damaging	0.004	Pro-Damg	1	D	-2.8
rs587780614	11,108122704,A,C	Y583S	T	0.418	B	0	N	-0.24
rs587780614	11,108122704,A,G	Y583C	T	0.179	B	0	N	-0.53
rs587780614	11,108122704,A,T	Y583F	T	0.698	B	0.055	N	-0.71
rs587780615	11,108123587,A,G	T616A	T	0.129	B	0.258	N	-1.93
rs587780615	11,108123587,A,T	T616S	Damaging	0.035	B	0.071	N	-1.6
rs587780617	11,108127024,C,T	A736V	Damaging	0.019	B	0.025	N	-0.74
rs587780618	11,108138041,C,G	N870K	T	0.218	B	0.007	N	-1.63
rs587780618	11,108138041,C,T	N870N	T	1	Not found	Not found	N	0
rs587780619	11,108141997,C,T	R981C	Damaging	0	Pro-Damg	0.999	D	-3.71
rs587780620	11,108143503,G,A	V1070I	T	0.063	B	0.052	N	-0.12
rs587780620	11,108143503,G,T	V1070L	T	0.257	B	0.092	N	-1.02
rs587780625	11,108106547,A,C	Q161P	T	0.192	B	0.001	N	-0.46
rs587780625	11,108106547,A,G	Q161R	T	0.12	Pos-Damg	0.822	N	-1.11
rs587780627	11,108170561,A,G	Q1709R	T	0.289	B	0.053	N	-1.45
rs587780627	11,108170561,A,T	Q1709L	Damaging	0.013	B	0.236	D	-2.81
rs587780628	11,108175544,C,A	T1880K	Damaging	0.045	B	0.223	N	-1.63
rs587780628	11,108175544,C,G	T1880R	T	0.093	B	0.051	N	-1.99
rs587780628	11,108175544,C,T	T1880M	Damaging	0.035	Pro-Damg	0.971	N	-1.85
rs587780629	11,108114757,C,A	H192N	Damaging	0.021	B	0.22	N	-2.12
rs587780629	11,108114757,C,G	H192D	Damaging	0.017	B	0.22	D	-2.84
rs587780629	11,108114757,C,T	H192Y	T	0.097	B	0.002	N	-1.75
rs587780631	11,108188194,T,C	L2098P	Damaging	0.009	Pro-Damg	0.996	D	-3.67
rs587780631	11,108188194,T,G	L2098R	Damaging	0.009	Pro-Damg	0.996	D	-2.93
rs587780632	11,108188216,G,C	R2105S	Damaging	0	Pro-Damg	1	D	-5.67
rs587780633	11,108188218,A,C	N2106T	Damaging	0.006	Pro-Damg	1	N	-2.4
rs587780633	11,108188218,A,T	N2106I	Damaging	0.001	Pro-Damg	1	D	-3.12
rs587780634	11,108188244,G,A	V2115I	T	0.392	Pos-Damg	0.672	N	-0.47
rs587780634	11,108188244,G,C	V2115L	T	0.673	B	0.316	N	-0.73
rs587780635	11,108190753,C,A	F2140L	T	0.071	Pro-Damg	0.998	N	-2.13
rs587780639	11,108202764,G,A	E2596E	T	1	B		N	0
rs587780639	11,108202764,G,C	E2596D	T	0.407	B	0.172	N	-0.86
rs587780639	11,108202764,G,T	E2596D	T	0.407	B	0.172	N	-0.86
rs587780642	11,108218023,C,A	L2868I	Damaging	0	Pro-Damg	1	N	-1.32
rs587780642	11,108218023,C,G	L2868V	Damaging	0	Pro-Damg	1	N	-2.19
rs587780643	11,108224537,G,A	V2906I	Damaging	0	Pro-Damg	0.999	N	-0.46
rs587781296	11,108129754,G,A	L806L	T	1	Not found	Not found	N	0
rs587781296	11,108129754,G,T	L806F	Damaging	0.023	Pro-Damg	0.995	N	-1.45
rs587781302	11,108186590,A,G	D2016G	Damaging	0	Pro-Damg	1	D	-6.81
rs587781302	11,108186590,A,T	D2016V	Damaging	0	Pro-Damg	1	D	-8.75
rs587781304	11,108124750,A,G	N703S	T	0.792	B	0	N	-0.76
rs587781320	11,108164094,T,C	Y1556H	T	0.393	B	0.028	N	-0.97
rs587781323	11,108199871,A,C	M2405L	T	0.084	Pos-Damg	0.906	N	-2.18
rs587781323	11,108199871,A,G	M2405V	Damaging	0.005	Pro-Damg	0.998	D	-3.09
rs587781344	11,108205732,A,G	I2683V	T	0.487	B	0.008	N	-0.27
rs587781344	11,108205732,A,T	I2683L	Damaging	0.017	Pos-Damg	0.573	N	-1.66
rs587781352	11,108137923,A,G	D831G	Damaging	0.044	Pos-Damg	0.651	N	-1.48
rs587781352	11,108137923,A,T	D831V	T	0.089	B	0.024	N	-1.66
rs587781361	11,108200991,G,A	R2453H	T	0.239		0.01	N	-1.59
rs587781361	11,108200991,G,C	R2453P	T	0.181	Pos-Damg	0.753	D	-2.78
rs587781365	11,108202247,T,C	M2531T	T	1	B	0	N	-0.85
rs587781366	11,108122580,T,C	L542L	T	1	Not found	Not found	N	0
rs587781370	11,108203582,A,C	I2628L	Damaging	0.01	Pro-Damg	0.985	N	-1.66
rs587781370	11,108203582,A,G	I2628V	T	0.099	Pos-Damg	0.925	N	-0.43
rs587781390	11,108175417,T,C	C1838R	Damaging	0.005	Pos-Damg	0.948	D	-7.36
rs587781390	11,108175417,T,G	C1838G	T	0.088	Pos-Damg	0.722	D	-6.58
rs587781391	11,108114702,G,T	R173S	T	0.413	B	0	N	-1.06
rs587781413	11,108236066,G,A	S3001N	Damaging	0.048	Pos-Damg	0.86	N	-1.02
rs587781413	11,108236066,G,C	S3001T	T	0.07	Pos-Damg	0.753	N	-1.22
rs587781414	11,108206680,A,G	T2754A	T	0.157	Pos-Damg	0.931	D	-3.04
rs587781446	11,108128295,A,G	M780V	T	0.167	B	0.004	N	-0.52
rs587781446	11,108128295,A,T	M780L	T	0.641	B	0	N	-0.51
rs587781511	11,108117756,A,G	I323V	T	0.188	Pro-Damg	0.979	N	-0.35
rs587781521	11,108196203,A,C	I2247L	T	1	B	0	N	-0.16
rs587781521	11,108196203,A,G	I2247V	T	0.513	B	0	N	-0.5
rs587781545	11,108100002,C,A	Q95K	T	0.074	Pro-Damg	0.992	N	-1.07
rs587781545	11,108100002,C,G	Q95E	Damaging	0.021	Pro-Damg	0.981	N	-0.94
rs587781545	11,108100002,C,T	Not found	Not found	Not found	Not found	Not found	Not found	Not found
rs587781562	11,108196153,T,C	I2230T	Damaging	0.016	Pos-Damg	0.833	N	-2.34
rs587781575	11,108172467,C,T	T1757I	T	0.205	B	0.003	N	-0.43
rs587781582	11,108119817,A,G	D408G	T	0.261	B	0.219	N	-1.98
rs587781583	11,108129713,A,C	K793Q	T	0.419	B	0	N	-0.09
rs587781583	11,108129713,A,G	K793E	T	1	B	0	N	0.52
rs587781595	11,108127006,G,A	C730Y	Damaging	0.017	B	0.13	D	-2.54
rs587781607	11,108128215,T,C	M753T	Damaging	0.014	B	0.304	N	-1.8
rs587781622	11,108173748,A,G	M1830V	T	0.488	B	0.004	N	0.46
rs587781630	11,108236134,A,C	T3024P	Damaging	0.029	Pro-Damg	0.997	D	-2.67
rs587781630	11,108236134,A,G	T3024A	T	0.192	B	0.412	N	-1.27
rs587781654	11,108126948,A,G	N711D	T	0.762	B	0	N	-0.37
rs587781661	11,108098556,T,G	H42Q	T	0.556	B	0	N	0.09
rs587781672	11,108199754,G,A	E2366K	T	0.215	B	0.005	N	-2.05
rs587781672	11,108199754,G,T	Not found	Not found	Not found	Not found	Not found	Not found	Not found
rs587781674	11,108196248,G,C	A2262P	Damaging	0.005	Pro-Damg	1	D	-4.53
rs587781679	11,108168065,T,C	L1654S	Damaging	0.001	Pro-Damg	1	D	-3.69
rs587781688	11,108106492,A,G	N143D	Damaging	0.04	Pos-Damg	0.679	N	-1.38
rs587781698	11,108236062,C,G	Q3000E	T	0.465	Pro-Damg	0.995	N	-0.42
rs587781698	11,108236062,C,T	Not found	Not found	Not found	Not found	Not found	Not found	Not found
rs587781711	11,108236220,G,A	Not found	Not found	Not found	Not found	Not found	Not found	Not found
rs587781711	11,108236220,G,T	W3052C	Damaging	0	Pro-Damg	1	D	-11.19
rs587781712	11,108164101,C,T	T1558M	T	0.088	B	0.021	N	-1.55
rs587781741	11,108106444,A,G	T127A	T	0.219	Pos-Damg	0.679	N	-0.97
rs587781741	11,108106444,A,T	T127S	Damaging	0.044	Pos-Damg	0.912	N	-1.14
rs587781753	11,108124556,A,C	K638N	T	0.385	B	0.001	N	-0.23
rs587781753	11,108124556,A,T	K638N	T	0.385	B	0.001	N	-0.23
rs587781785	11,108158382,C,T	T1350M	T	0.116	Pro-Damg	0.993	D	-2.56
rs587781787	11,108155038,G,A	E1277E	T	0.899	Not found	Not found	N	0
rs587781787	11,108155038,G,C	E1277D	T	0.337	B	0.049	N	-1.39
rs587781789	11,108192052,T,G	C2159W	Damaging	0.001	Pro-Damg	0.996	D	-5.36
rs587781808	11,108137962,G,A	G844E	T	1	B	0	N	0.9
rs587781808	11,108137962,G,C	G844A	T	0.534	B	0	N	-0.67
rs587781812	11,108137953,A,C	D841A	Damaging	0.01	B	0.349	D	-2.6
rs587781812	11,108137953,A,G	D841G	Damaging	0.006	Pos-Damg	0.79	N	-2.44
rs587781814	11,108218086,G,A	D2889N	Damaging	0	Pro-Damg	1	D	-4.31
rs587781814	11,108218086,G,C	D2889H	Damaging	0	Pro-Damg	1	D	-6.03
rs587781815	11,108143579,G,A	R1095K	T	0.536	Pos-Damg	0.704	N	-0.24
rs587781829	11,108114799,A,C	N206H	T	0.246	B	0.001	N	-1.6
rs587781838	11,108199952,A,G	I2432V	T	1	B	0.001	N	0.14
rs587781838	11,108199952,A,T	I2432F	Damaging	0.014	B	0.005	D	-2.59
rs587781841	11,108121571,C,G	T460R	T	0.53	B	0.003	N	-0.21
rs587781841	11,108121571,C,T	T460M	T	0.21	B	0.007	N	-0.57
rs587781854	11,108202251,G,A	M2532I	T	0.204	B	0.016	N	-1.44
rs587781855	11,108141864,A,T	K971I	T	0.072	B	0.004	N	-2.41
rs587781857	11,108115661,G,A	R270K	T	0.169	Pos-Damg	0.939	N	-0.89
rs587781861	11,108192146,A,G	R2191G	T	0.11	Pos-Damg	0.854	D	-2.56
rs587781865	11,108180888,C,T	P1922S	T	0.229	B	0.007	D	-2.6
rs587781894	11,108236087,G,A	R3008H	Damaging	0.004	Pro-Damg	1	D	-4
rs587781894	11,108236087,G,C	R3008P	Damaging	0.004	Pro-Damg	1	D	-5.46
rs587781894	11,108236087,G,T	R3008L	Damaging	0.005	Pro-Damg	1	D	-5.56
rs587781897	11,108204615,G,A	G2644S	T	0.468	B	0.205	N	-0.35
rs587781897	11,108204615,G,C	G2644R	T	0.188	B	0.373	N	-1.58
rs587781907	11,108122713,A,T	E586V	T	0.209	B	0.085	N	-1.24
rs587781911	11,108150321,G,A	G1130R	Damaging	0.035	B	0.018	D	-2.66
rs587781911	11,108150321,G,T	Not found	Not found	Not found	Not found	Not found	Not found	Not found
rs587781937	11,108099970,C,T	A84V	T	0.083	B	0.041	N	-1.29
rs587781944	11,108163380,T,C	F1491L	T	0.66	B	0.001	N	-1.44
rs587781944	11,108163380,T,G	F1491V	T	0.508	B	0.01	N	-1.73
rs587781946	11,108206607,A,C	Q2729H	Damaging	0.001	Pro-Damg	1	D	-4.21
rs587781946	11,108206607,A,G	Q2729Q	T	1	Not found	Not found	N	0
rs587781946	11,108206607,A,T	Q2729H	Damaging	0.001	Pro-Damg	1	D	-4.21
rs587781963	11,108180982,C,G	T1953R	Damaging	0	Pro-Damg	1	D	-5.56
rs587781963	11,108180982,C,T	T1953I	Damaging	0	Pro-Damg	1	D	-5.63
rs587781967	11,108206605,C,G	Q2729E	T	0.069	Pro-Damg	0.972	N	-2.39
rs587781967	11,108206605,C,T	Not found	Not found	Not found	Not found	Not found	Not found	Not found
rs587781973	11,108115645,A,G	I265V	T	0.433	B	0.001	N	-0.22
rs587781990	11,108205809,T,A	D2708E	Damaging	0	Pro-Damg	1	D	-3.4
rs587781990	11,108205809,T,C	D2708D	T	1	Not found	Not found	N	0
rs587781992	11,108139334,A,C	M946L	T	0.316	B	0.077	N	-1.41
rs587781992	11,108139334,A,G	M946V	T	0.142	B	0.064	N	-1.81
rs587781993	11,108175542,A,C	Q1879H	T	0.142	B	0.003	N	-0.86
rs587781993	11,108175542,A,G	Q1879Q	T	0.827	Not found	Not found	N	0
rs587781994	11,108204636,C,A	Q2651K	T	0.115	Pro-Damg	0.959	N	-2.25
rs587781994	11,108204636,C,T	Not found	Not found	Not found	Not found	Not found	Not found	Not found
rs587782001	11,108205814,A,G	K2710R	T	0.674	B	0	N	-1.14
rs587782035	11,108154985,G,A	V1260M	Damaging	0.002	Pro-Damg	1	N	-1.47
rs587782037	11,108164095,A,C	Y1556S	T	0.325	B	0.002	D	-2.7
rs587782037	11,108164095,A,G	Y1556C	T	0.088	Pro-Damg	0.963	D	-3.85
rs587782049	11,108206593,G,C	D2725H	Damaging	0	Pro-Damg	1	D	-6.04
rs587782080	11,108115691,T,C	I280T	Damaging	0.003	B	0.376	N	-2.19
rs587782121	11,108121528,C,A	Q446K	T	0.47	B	0.1	N	-0.93
rs587782121	11,108121528,C,T	Not found	Not found	Not found	Not found	Not found	Not found	Not found
rs587782126	11,108160450,T,C	I1453T	Damaging	0.006	B	0.112	D	-2.81
rs587782126	11,108160450,T,G	I1453R	Damaging	0.003	B	0.306	D	-4.11
rs587782128	11,108128311,G,A	R785H	T	0.136	B	0.162	N	-0.69
rs587782141	11,108124647,T,C	C669R	T	0.368	B	0.011	N	-0.12
rs587782149	11,108225561,T,A	V2937E	T	0.124	Pro-Damg	0.988	D	-4.11
rs587782149	11,108225561,T,C	V2937A	Damaging	0.032	Pro-Damg	1	D	-2.98
rs587782153	11,108170474,C,G	P1680R	Damaging	0.003	Pro-Damg	1	D	-5.89
rs587782153	11,108170474,C,T	P1680L	Damaging	0.004	Pro-Damg	1	D	-6.58
rs587782163	11,108142096,G,A	A1014T	Damaging	0.025	Pro-Damg	0.981	N	-1.24
rs587782163	11,108142096,G,C	A1014P	Damaging	0.035	Pro-Damg	0.999	N	-2.09
rs587782178	11,108106426,T,A	L121I	T	0.165	Pro-Damg	0.966	N	-0.3
rs587782195	11,108153549,A,G	N1230S	T	1	B	0	N	0.26
rs587782202	11,108216597,G,A	R2849Q	Damaging	0	Pro-Damg	1	D	-3.18
rs587782202	11,108216597,G,C	R2849P	Damaging	0	Pro-Damg	1	D	-5.57
rs587782212	11,108121793,C,G	P534R	Damaging	0	Pro-Damg	1	D	-4.34
rs587782212	11,108121793,C,T	P534L	Damaging	0	Pro-Damg	1	D	-4.71
rs587782225	11,108199779,A,C	E2374A	T	0.402	B	0.016	N	-1.83
rs587782226	11,108123630,T,C	V630A	T	0.848	B	0	N	0.35
rs587782229	11,108115544,A,C	H231P	T	0.332	B	0.004	N	-1.71
rs587782229	11,108115544,A,G	H231R	T	0.359	B	0.138	N	-1.67
rs587782236	11,108175550,G,A	R1882Q	T	0.094	B	0.025	N	-1.44
rs587782236	11,108175550,G,C	R1882P	Damaging	0.012	Pos-Damg	0.918	D	-2.64
rs587782239	11,108175523,G,A	C1873Y	T	0.548	B	0.172	N	-2.22
rs587782239	11,108175523,G,T	C1873F	T	0.626	B	0.007	N	-2.45
rs587782255	11,108129750,G,A	R805Q	T	0.065	Pos-Damg	0.944	N	-0.84
rs587782257	11,108117725,A,C	L312F	Damaging	0	Pro-Damg	1	N	-2.4
rs587782257	11,108117725,A,G	L312L	T	1	Not found	Not found	N	0
rs587782264	11,108224563,T,G	I2914M	Damaging	0.008	Pro-Damg	0.997	N	-1.89
rs587782274	11,108183192,A,C	E1991D	T	0.201	Pos-Damg	0.539	N	-1.85
rs587782292	11,108236086,C,A	R3008S	Damaging	0.005	Pro-Damg	0.999	D	-4.53
rs587782292	11,108236086,C,G	R3008G	Damaging	0.004	Pro-Damg	0.999	D	-5.49
rs587782292	11,108236086,C,T	R3008C	Damaging	0.001	Pro-Damg	1	D	-6.32
rs587782298	11,108139269,G,A	R924Q	T	0.28	Pos-Damg	0.522	N	-0.78
rs587782310	11,108200961,G,A	R2443Q	Damaging	0.043	Pro-Damg	1	N	-1.71
rs587782317	11,108206608,C,A	Q2730K	Damaging	0	Pro-Damg	1	D	-3.45
rs587782327	11,108192083,T,C	Y2170H	Damaging	0	Pro-Damg	1	D	-3.96
rs587782328	11,108106498,C,A	L145I	T	0.166	Pro-Damg	1	N	-0.73
rs587782328	11,108106498,C,G	L145V	Damaging	0.012	Pro-Damg	1	N	-1.34
rs587782328	11,108106498,C,T	L145L	T	1	Not found	Not found	N	0
rs587782353	11,108106511,T,A	I149N	Damaging	0.001	Pro-Damg	1	D	-3.97
rs587782382	11,108139145,A,G	N883D	Damaging	0.046	B	0.049	N	-1.49
rs587782397	11,108137907,A,C	I826L	T	0.334	B	0.003	N	-0.26
rs587782399	11,108206584,C,G	L2722V	Damaging	0	Pro-Damg	1	D	-2.59
rs587782399	11,108206584,C,T	L2722L	T	1	Not found	Not found	N	0
rs587782417	11,108214033,G,A	D2785N	T	0.392	B	0	N	-0.22
rs587782442	11,108160359,T,A	C1423S	T	0.558	B	0.349	D	-2.62
rs587782442	11,108160359,T,C	C1423R	Damaging	0.039	Pro-Damg	0.997	D	-3.76
rs587782451	11,108218045,A,C	N2875T	Damaging	0	Pro-Damg	1	D	-5.17
rs587782451	11,108218045,A,G	N2875S	Damaging	0	Pro-Damg	1	D	-4.31
rs587782463	11,108122566,C,A	P537H	Damaging	0.009	B	0.412	N	-1.29
rs587782470	11,108151849,G,A	C1177Y	T	0.066	Pos-Damg	0.873	N	-1.47
rs587782470	11,108151849,G,C	C1177S	Damaging	0.02	Pro-Damg	0.988	N	-2.47
rs587782478	11,108196182,G,C	D2240H	Damaging	0.029	Pos-Damg	0.549	D	-2.77
rs587782487	11,108203627,A,G	K2643E	T	0.171	B	0.023	N	-1.47
rs587782497	11,108225596,G,A	V2949I	Damaging	0.04	Pro-Damg	0.986	N	0.01
rs587782503	11,108181003,T,A	I1960N	Damaging	0	Pro-Damg	1	D	-6
rs587782506	11,108165679,G,A	S1601N	T	0.139	B	0.009	N	-0.78
rs587782509	11,108106504,A,G	K147E	Damaging	0.006	Pro-Damg	1	N	-1.77
rs587782516	11,108178639,T,G	F1897C	T	0.225	B	0.003	N	-0.33
rs587782521	11,108141861,T,A	L970Q	Damaging	0.001	Pro-Damg	1	D	-3.48
rs587782521	11,108141861,T,C	L970P	Damaging	0.001	Pro-Damg	1	D	-3.46
rs587782526	11,108117819,A,T	N344Y	Damaging	0.008	Pro-Damg	0.989	D	-3.39
rs587782532	11,108172430,A,C	T1745P	Damaging	0.019	B	0.002	N	-2.22
rs587782544	11,108124598,T,G	F652L	Damaging	0.017	B	0.172	N	-2.41
rs587782551	11,108170516,C,G	A1694G	T	0.174	B	0.215	N	-1.42
rs587782551	11,108170516,C,T	A1694V	T	0.269	B	0.001	N	-0.59
rs587782652	11,108205832,T,C	V2716A	Damaging	0	Pro-Damg	0.994	D	-3.39
rs587782655	11,108173734,A,C	Q1825P	T	0.105	Pos-Damg	0.661	D	-2.64
rs587782655	11,108173734,A,G	Q1825R	T	1	B	0	N	-0.35
rs587782688	11,108153582,A,G	Y1241C	T	0.285	B	0.005	N	1.17
rs587782688	11,108153582,A,T	Y1241F	T	0.354	Pos-Damg	0.757	N	-1.4
rs587782692	11,108202214,T,G	M2520R	Damaging	0.001	Pro-Damg	1	D	-4.71
rs587782719	11,108205807,G,A	D2708N	Damaging	0	Pro-Damg	1	D	-4.15
rs587782719	11,108205807,G,C	D2708H	Damaging	0	Pro-Damg	1	D	-5.92
rs587782719	11,108205807,G,T	D2708Y	Damaging	0	Pro-Damg	1	D	-7.67
rs587782729	11,108121570,A,C	T460P	T	0.243	B	0.167	N	-1.31
rs587782741	11,108154979,C,A	H1258N	Damaging	0.009	Pos-Damg	0.811	D	-3.77
rs587782762	11,108151846,T,A	L1176Q	Damaging	0.002	Pro-Damg	0.997	D	-4
rs587782762	11,108151846,T,G	L1176R	Damaging	0.001	Pro-Damg	0.99	D	-4.24
rs587782802	11,108188197,A,G	H2099R	T	1	B	0	N	-0.1
rs587782896	11,108168025,G,C	D1641H	Damaging	0.013	Pro-Damg	0.981	D	-2.73
rs587782902	11,108115678,A,C	K276Q	Damaging	0.009	Pro-Damg	1	N	-1.52
rs587782902	11,108115678,A,G	K276E	Damaging	0.006	Pro-Damg	1	N	-1.34
rs730881311	11,108196068,T,G	Y2202D	Damaging	0.021	Pro-Damg	0.999	D	-4.93
rs730881312	11,108196107,A,G	S2215G	Damaging	0.006	Pro-Damg	0.998	N	-2.12
rs730881313	11,108196135,T,C	M2224T	Damaging	0.003	Pro-Damg	0.967	D	-3.4
rs730881314	11,108198472,C,A	T2359N	T	1	B	0.001	N	1.76
rs730881314	11,108198472,C,T	T2359I	Damaging	0.049	Pos-Damg	0.95	N	-2.34
rs730881315	11,108199881,C,A	Not found	Not found	Not found	Not found	Not found	Not found	Not found
rs730881315	11,108199881,C,T	S2408L	Damaging	0.003	Pro-Damg	0.999	D	-4.13
rs730881317	11,108200941,A,C	R2436S	Damaging	0.009	Pro-Damg	0.998	D	-2.62
rs730881318	11,108200969,G,A	E2446K	T	0.116	Pro-Damg	0.972	N	-1.46
rs730881319	11,108202748,G,A	S2591N	T	0.546	B	0.001	N	-0.46
rs730881320	11,108205729,A,C	T2682P	T	0.151	Pro-Damg	1	N	-2.41
rs730881321	11,108206648,C,G	T2743R	Damaging	0.015	Pos-Damg	0.883	N	-1.24
rs730881321	11,108206648,C,T	T2743M	Damaging	0.008	Pro-Damg	0.99	N	-2.07
rs730881322	11,108213976,G,A	V2766I	T	0.119	Pos-Damg	0.844	N	-0.1
rs730881323	11,108214075,T,A	F2799I	T	0.397	B	0	N	-0.24
rs730881323	11,108214075,T,G	F2799V	T	0.503	B	0	N	-0.13
rs730881324	11,108214085,A,G	Q2802R	T	0.931	B	0.029	N	1.59
rs730881325	11,108216479,A,C	K2810Q	T	0.059	B	0.063	N	-0.94
rs730881325	11,108216479,A,G	K2810E	Damaging	0.047	B	0.119	N	-1.43
rs730881327	11,108218038,G,A	V2873I	T	0.25	B	0.009	N	-0.22
rs730881328	11,108224538,T,C	V2906A	Damaging	0	Pro-Damg	1	D	-3.45
rs730881329	11,108224583,C,A	T2921K	Damaging	0.003	Pro-Damg	1	D	-3.01
rs730881329	11,108224583,C,T	T2921M	Damaging	0.001	Pro-Damg	1	D	-3.17
rs730881330	11,108106463,A,G	N133S	T	0.902	B	0	N	0.06
rs730881330	11,108106463,A,T	N133I	Damaging	0.043	B	0.213	N	-0.81
rs730881331	11,108235876,G,T	R2973M	Damaging	0.023	B	0.064	N	-1.16
rs730881332	11,108236215,G,C	G3051R	Damaging	0	Pro-Damg	1	D	-6.89
rs730881333	11,108114721,C,A	Q180K	T	0.311	B	0	N	-0.43
rs730881333	11,108114721,C,T	Not found	Not found	Not found	Not found	Not found	Not found	Not found
rs730881334	11,108114722,A,G	Q180R	T	0.283	B	0.002	N	-0.66
rs730881335	11,108114737,T,C	V185A	T	0.143	B	0.376	N	-0.89
rs730881337	11,108115625,T,A	I258N	Damaging	0.026	Pro-Damg	0.993	D	-2.53
rs730881337	11,108115625,T,G	I258S	T	0.284	Pos-Damg	0.872	N	-1.69
rs730881338	11,108115643,A,C	Y264S	T	0.051	Pos-Damg	0.843	N	-2.07
rs730881338	11,108115643,A,G	Y264C	T	0.053	B	0.011	N	-2.36
rs730881339	11,108115663,C,A	L271I	T	0.356	B	0.138	N	-0.37
rs730881339	11,108115663,C,G	L271V	T	0.262	B	0.062	N	-0.34
rs730881339	11,108115663,C,T	L271F	T	0.194	B	0.001	N	-0.91
rs730881340	11,108119804,C,G	Q404E	T	0.113	B	0.19	N	-0.82
rs730881341	11,108122627,G,A	M557I	T	0.438	B	0	N	-0.44
rs730881342	11,108122683,T,A	I576K	Damaging	0.002	Pro-Damg	0.998	D	-3.34
rs730881342	11,108122683,T,C	I576T	Damaging	0.004	Pro-Damg	0.979	N	-2.35
rs730881343	11,108122748,A,C	I598L	T	0.293	B	0.02	N	-0.57
rs730881343	11,108122748,A,G	I598V	T	0.839	B	0	N	-0.03
rs730881344	11,108124653,A,G	I671V	T	1	B	0	N	0.15
rs730881345	11,108127009,A,T	Y731F	T	0.217	B	0.203	N	-1.01
rs730881348	11,108129762,C,A	Not found	Not found	Not found	Not found	Not found	Not found	Not found
rs730881348	11,108129762,C,T	S809L	T	0.054	Pos-Damg	0.773	N	-1.5
rs730881349	11,108137932,A,G	E834G	T	0.066	Pos-Damg	0.883	N	-1.9
rs730881349	11,108137932,A,T	E834V	T	0.118	Pos-Damg	0.883	N	-1.59
rs730881351	11,108139153,A,T	L885F	Damaging	0.008	Pro-Damg	1	N	-2.17
rs730881352	11,108139203,A,C	K902T	Damaging	0.047	B	0.112	N	-1.97
rs730881352	11,108139203,A,G	K902R	T	0.58	B	0	N	-0.69
rs730881353	11,108139233,A,G	Q912R	T	0.177	Pro-Damg	0.974	N	-1.57
rs730881353	11,108139233,A,T	Q912L	T	0.236	B	0.003	N	-1.68
rs730881354	11,108141980,A,G	N975S	T	0.636	B	0	N	-1.41
rs730881355	11,108143266,A,T	T1029S	T	0.528	B	0.001	N	-0.34
rs730881356	11,108143309,T,G	V1043G	Damaging	0.002	Pos-Damg	0.828	D	-3.93
rs730881358	11,108143560,G,A	A1089T	T	0.531	B	0	N	-1.08
rs730881358	11,108143560,G,T	A1089S	T	0.257	B	0.004	N	-1.28
rs730881359	11,108098352,A,C	M1L	Damaging	0	Pos-Damg	0.55	N	-1.19
rs730881359	11,108098352,A,G	M1V	Damaging	0	Pos-Damg	0.737	N	-1.47
rs730881360	11,108098356,G,A	S2N	T	0.072	Pro-Damg	0.999	N	-0.79
rs730881360	11,108098356,G,C	S2T	Damaging	0.025	Pro-Damg	0.998	N	-0.85
rs730881361	11,108098506,G,C	E26Q	T	0.189	Pos-Damg	0.943	N	-0.61
rs730881362	11,108098584,G,A	G52R	Damaging	0.004	Pos-Damg	0.82	N	-2.4
rs730881362	11,108098584,G,T	Not found	Not found	Not found	Not found	Not found	Not found	Not found
rs730881363	11,108153588,A,C	N1243T	T	0.67	B	0	N	-0.23
rs730881363	11,108153588,A,G	N1243S	T	1	B	0	N	0.03
rs730881363	11,108153588,A,T	N1243I	Damaging	0.026	B	0.059	D	-2.93
rs730881365	11,108155039,G,A	D1278N	Damaging	0.046	Pro-Damg	0.999	N	-2.42
rs730881366	11,108155168,A,G	M1321V	T	0.758	B	0	N	-0.76
rs730881368	11,108159820,C,A	S1409Y	Damaging	0.003	Pro-Damg	0.997	D	-3.44
rs730881369	11,108160488,C,G	R1466G	Damaging	0.003	Pro-Damg	0.998	D	-5.66
rs730881369	11,108160488,C,T	Not found	Not found	Not found	Not found	Not found	Not found	Not found
rs730881370	11,108100041,G,A	A108T	Damaging	0.009	Pos-Damg	0.783	N	-1.8
rs730881371	11,108168036,G,A	M1644I	T	0.519	B	0	N	0.15
rs730881371	11,108168036,G,C	M1644I	T	0.519	B	0	N	0.15
rs730881372	11,108172391,G,A	A1732T	T	0.063	Pro-Damg	0.997	N	-2.32
rs730881373	11,108173622,G,A	G1788S	T	0.946	B	0	N	0.43
rs730881374	11,108173637,A,C	N1793H	T	0.078	Pos-Damg	0.533	N	-1.47
rs730881375	11,108175579,G,A	E1892K	T	0.25	B	0.053	N	-0.89
rs730881376	11,108178626,T,A	S1893T	T	0.28	B	0.083	N	-0.63
rs730881377	11,108181039,A,C	K1972T	T	0.332	B	0.112	N	-0.91
rs730881378	11,108186550,G,A	D2003N	Damaging	0.036	Pro-Damg	0.992	N	-1.13
rs730881379	11108188154,G,C	D2085H	Not found	Not found	B		Not found	Not found
rs730881379	11,108188154,G,T	D2085Y	Damaging	0.013	Pro-Damg	0.98	D	-2.71
rs730881380	11,108188158,A,G	Y2086C	T	0.155	Pos-Damg	0.619	N	-1.8
rs730881380	11,108188158,A,T	Y2086F	T	0.542	B	0.03	N	-1.2
rs730881381	11,108190707,A,G	H2125R	Damaging	0.003	Pro-Damg	1	D	-5.69
rs730881381	11,108190707,A,T	H2125L	Damaging	0.001	Pro-Damg	1	D	-7.98
rs730881382	11,108190776,A,C	K2148T	Damaging	0.015	B	0.193	D	-3.18
rs730881382	11,108190776,A,G	K2148R	T	0.376	B	0.004	N	-1.29
rs730881382	11,108190776,A,T	K2148I	Damaging	0.005	Pos-Damg	0.904	D	-5.36
rs730881383	11,108201008,C,A	R2459S	Damaging	0.002	Pro-Damg	1	D	-4.07
rs730881383	11,108201008,C,G	R2459G	Damaging	0.002	Pro-Damg	1	D	-5.44
rs730881383	11,108201008,C,T	R2459C	Damaging	0	Pro-Damg	1	D	-6.38
rs730881384	11,108204682,C,A	T2666N	Damaging	0	Pro-Damg	1	D	-3.91
rs730881385	11,108205831,G,T	V2716F	Damaging	0	Pro-Damg	1	D	-3.85
rs730881387	11,108117808,C,A	A340D	Damaging	0.028	Pro-Damg	0.995	N	-2.11
rs730881387	11,108117808,C,G	A340G	T	0.066	Pro-Damg	0.963	N	-1.7
rs730881387	11,108117808,C,T	A340V	Damaging	0.018	Pro-Damg	0.995	N	-1.13
rs730881389	11,108155055,T,C	L1283P	Damaging	0	Pro-Damg	1	D	-5.13
rs730881390	11,108158403,C,A	S1357Y	Damaging	0.031	B	0.148	N	-0.51
rs730881390	11,108158403,C,G	S1357C	Damaging	0.031	B	0.412	N	-1.18
rs730881391	11,108160486,T,C	L1465P	Damaging	0.001	Pro-Damg	1	D	-5.59
rs730881392	11,108160492,A,G	D1467G	Damaging	0	Pro-Damg	1	D	-6.02
rs730881393	11,108165733,G,A	R1619K	T	0.639	B	0.001	N	-0.46
rs730881394	11,108180949,C,T	A1942V	Damaging	0.004	Pro-Damg	1	D	-3.79
rs730882129	11,108142123,G,A	G1023R	T	0.208	B	0.331	N	-1.21
rs745351684	11,108163509,G,A	V1534I	T	0.57	B	0.004	N	-0.18
rs745351684	11,108163509,G,T	V1534F	Damaging	0.014	Pos-Damg	0.905	D	-2.72
rs745399310	11,108126985,T,C	V723A	T	0.118	B	0.278	N	-0.76
rs745467552	11,108153491,G,A	A1211T	T	1	B	0	N	-0.1
rs745467552	11,108153491,G,T	A1211S	T	0.976	B	0.002	N	0.32
rs745509434	11,108121620,A,C	Q476H	T	0.559	B	0	N	-0.61
rs745509434	11,108121620,A,G	Q476Q	T	0.361	Not found	Not found	N	0
rs745737218	11,108139284,T,C	M929T	T	0.166	B	0.116	N	-1.6
rs745737218	11,108139284,T,G	M929R	T	0.203	B	0.138	N	-1.42
rs745773225	11,108117717,A,G	S310G	T	0.119	Pos-Damg	0.682	N	-1.4
rs745775382	11,108204681,A,C	T2666P	Damaging	0	Pro-Damg	1	D	-4.91
rs745775382	11,108204681,A,G	T2666A	Damaging	0	Pro-Damg	1	D	-3.98
rs745863765	11,108150298,A,G	N1122S	T	0.282	B	0.004	N	-1.27
rs745890227	11,108106487,G,A	C141Y	T	1	B	0	N	-0.03
rs745977589	11,108188147,A,G	K2082K	T	1	Not found	Not found	N	0
rs745977589	11,108188147,A,T	K2082N	T	0.09	Pos-Damg	0.684	N	-1.86
rs746090916	11,108129779,A,G	I815V	Damaging	0.033	B	0.177	N	-0.45
rs746103632	11,108165693,C,G	L1606V	T	0.322	Pos-Damg	0.866	N	-0.59
rs746103632	11,108165693,C,T	L1606F	T	0.117	Pro-Damg	0.999	N	-1.4
rs746106249	11,108175570,T,A	L1889M	T	0.131	B	0.008	N	0.08
rs746106249	11,108175570,T,G	L1889V	T	0.316	B	0.054	N	-0.38
rs746133264	11,108142127,C,T	A1024V	T	0.127	B	0.003	N	-1.58
rs746220021	11,108170536,A,G	K1701E	T	0.755	B	0	N	0.11
rs746235533	11,108098418,C,G	R23G	Damaging	0	Pro-Damg	1	D	-3.25
rs746235533	11,108098418,C,T	Not found	Not found	Not found	Not found	Not found	Not found	Not found
rs746265230	11,108138067,T,C	I879T	T	0.503	B	0	N	-0.24
rs746351323	11,108225551,A,G	T2934A	Damaging	0	Pro-Damg	1	D	-4.14
rs746475628	11,108214007,T,A	I2776N	Damaging	0.001	Pro-Damg	1	D	-5.73
rs746475628	11,108214007,T,C	I2776T	Damaging	0.002	Pro-Damg	0.999	D	-3.98
rs746676271	11,108180952,A,G	K1943R	T	0.331	B	0.366	N	-1.45
rs746709782	11,108158331,A,T	D1333V	Damaging	0.01	Pro-Damg	0.985	D	-3.7
rs746815819	11,108196848,T,C	W2291R	Damaging	0	Pro-Damg	1	D	-6.56
rs746945284	11,108173629,A,G	D1790G	T	0.593	B	0	N	-1.13
rs746945284	11,108173629,A,T	D1790V	Damaging	0.016	B	0.021	D	-3.02
rs747053710	11,108114823,T,C	S214P	Damaging	0.016	B	0.098	N	-1.7
rs747079458	11,108143287,T,C	F1036L	T	0.11	B	0.007	N	-0.3
rs747108452	11,108129802,A,C	L822F	T	0.105	Pro-Damg	1	N	-1.71
rs747108452	11,108129802,A,G	L822L	T	1	Not found	Not found	N	0
rs747242300	11,108123575,C,A	L612I	Damaging	0.013	Pro-Damg	0.983	N	-1.2
rs747242300	11,108123575,C,G	L612V	Damaging	0.048	Pos-Damg	0.816	N	-1.77
rs747242300	11,108123575,C,T	L612F	Damaging	0.007	Pro-Damg	0.999	N	-2.49
rs747317946	11,108168106,C,A	L1668I	T	0.163	Pro-Damg	0.97	N	-0.89
rs747317946	11,108168106,C,G	L1668V	T	0.095	Pro-Damg	0.985	N	-1.26
rs747317946	11,108168106,C,T	L1668L	T	1	Not found	Not found	N	0
rs747372355	11,108199847,C,G	Q2397E	Damaging	0	Pro-Damg	1	D	-2.55
rs747372355	11,108199847,C,T	Not found	Not found	Not found	Not found	Not found	Not found	Not found
rs747445236	11,108235908,C,A	L2984M	T	0.253	B	0.011	N	0.07
rs747445236	11,108235908,C,G	L2984V	T	0.529	B	0.054	N	-0.56
rs747448699	11,108204642,A,G	I2653V	Damaging	0.025	Pro-Damg	0.959	N	-0.86
rs747448699	11,108204642,A,T	I2653F	Damaging	0.014	Pro-Damg	0.979	D	-2.85
rs747563556	11,108119802,C,A	Not found	Not found	Not found	Not found	Not found	Not found	Not found
rs747563556	11,108119802,C,T	S403L	T	0.148	B	0.418	N	-0.97
rs747696133	11,108139184,C,G	L896V	T	0.161	B	0.445	N	-1.12
rs747727055	11,108115727,C,G	P292R	Damaging	0	Pro-Damg	1	D	-5.41
rs747727055	11,108115727,C,T	P292L	Damaging	0	Pro-Damg	1	D	-6.04
rs747764678	11,108216501,A,G	Y2817C	Damaging	0.004	Pro-Damg	1	D	-2.69
rs747800057	11,108170579,T,C	L1715P	Damaging	0.002	Pro-Damg	1	D	-4.45
rs748016261	11,108205805,C,G	S2707C	Damaging	0.001	Pro-Damg	1	D	-3.25
rs748054311	11,108192081,T,C	L2169P	Damaging	0.002	Pro-Damg	1	D	-5.24
rs748054311	11,108192081,T,G	L2169R	Damaging	0.002	Pro-Damg	1	D	-4.9
rs748125666	11,108128253,A,C	K766Q	Damaging	0.017	Pro-Damg	1	N	-1.37
rs748125666	11,108128253,A,G	K766E	Damaging	0.044	Pro-Damg	0.993	N	-1.29
rs748144169	11,108160383,A,C	N1431H	T	0.162	Pos-Damg	0.74	N	-2.24
rs748192003	11,108224493,G,A	G2891D	Damaging	0	Pro-Damg	1	D	-6.03
rs748192003	11,108224493,G,C	G2891A	Damaging	0	Pro-Damg	1	D	-5.17
rs748192003	11,108224493,G,T	G2891V	Damaging	0	Pro-Damg	1	D	-7.76
rs748203812	11,108137983,A,G	D851G	T	0.469	B	0	N	-1.63
rs748544160	11,108190771,T,A	S2146R	T	0.322	B	0.064	N	-1.73
rs748634900	11,108213973,G,A	G2765S	Damaging	0	Pro-Damg	1	D	-5.17
rs748752687	11,108143302,G,A	A1041T	Damaging	0.05	Pro-Damg	0.978	N	-1.28
rs748752687	11,108143302,G,T	A1041S	T	0.158	B	0.445	N	-0.61
rs748855312	11,108218026,G,A	G2869S	Damaging	0	Pro-Damg	1	D	-5.17
rs748898098	11,108163485,C,A	P1526T	Damaging	0.005	Pro-Damg	0.989	D	-5.4
rs748898098	11,108163485,C,T	P1526S	Damaging	0.013	Pro-Damg	0.978	D	-4.9
rs748900588	11,108172459,G,T	K1754N	Damaging	0.004	Pro-Damg	1	D	-2.52
rs749036865	11,108121561,C,A	R457R	T	1	Not found	Not found	N	0
rs749036865	11,108121561,C,G	R457G	T	0.061	Pos-Damg	0.589	D	-2.55
rs749036865	11,108121561,C,T	Not found	Not found	Not found	Not found	Not found	Not found	Not found
rs749193688	11,108216623,A,G	T2858A	T	0.071	Pro-Damg	0.988	D	-3.71
rs749215545	11,108159714,C,T	P1374S	Damaging	0	Pro-Damg	1	D	-5.44
rs749216212	11,108122670,T,A	L572I	Damaging	0.014	Pos-Damg	0.835	N	-0.82
rs749216212	11,108122670,T,G	L572V	T	0.082	B	0.176	N	-1.24
rs749261367	11,108196116,A,C	S2218R	T	0.219	B	0.004	N	-2.02
rs749471737	11,108142001,G,A	R982H	T	0.13	Pos-Damg	0.875	N	-1.74
rs749471737	11,108142001,G,C	R982P	Damaging	0.007	Pro-Damg	0.999	D	-3.18
rs749471737	11,108142001,G,T	R982L	Damaging	0.01	Pro-Damg	0.986	D	-3.59
rs749737164	11,108213988,T,G	C2770G	Damaging	0	Pro-Damg	1	D	-9.68
rs749770110	11,108160489,G,A	R1466Q	T	0.196	Pro-Damg	0.973	N	-2.47
rs749770110	11,108160489,G,T	R1466L	Damaging	0.004	Pro-Damg	0.998	D	-5.42
rs749776879	11,108098392,A,G	Q14R	T	0.552	B	0.001	N	-0.72
rs749844591	11,108137994,A,T	M855L	T	0.525	B	0.001	N	-0.67
rs749933079	11,108151821,T,A	C1168S	Damaging	0	Pro-Damg	1	D	-5.37
rs749933079	11,108151821,T,C	C1168R	Damaging	0	Pro-Damg	1	D	-6.7
rs749950833	11,108117827,T,A	I346I	T	1	Not found	Not found	N	0
rs749950833	11,108117827,T,G	I346M	Damaging	0.004	Pos-Damg	0.938	N	-1.27
rs750093937	11,108141867,C,T	P972L	Damaging	0.047	Pro-Damg	0.981	D	-3.55
rs750224234	11,108202720,A,G	R2582G	Damaging	0.006	Pos-Damg	0.917	N	-2.2
rs750224234	11,108202720,A,T	Not found	Not found	Not found	Not found	Not found	Not found	Not found
rs750280306	11,108121669,C,T	R493C	Damaging	0.024	B	0.357	D	-5.02
rs750285816	11,108196927,A,C	K2317T	T	0.091	Pos-Damg	0.934	N	-2.05
rs750306932	11,108160441,T,C	L1450P	Damaging	0.001	Pro-Damg	0.988	D	-4.74
rs750322758	11,108138034,A,G	D868G	T	0.18	B	0.002	N	-1.67
rs750322758	11,108138034,A,T	D868V	Damaging	0.026	B	0.059	D	-2.55
rs750441954	11,108235900,A,G	H2981R	T	0.352	B	0.015	N	-1.51
rs750506930	11,108126945,A,G	T710A	T	0.069	B	0.089	N	-1.98
rs750561317	11,108178674,A,G	M1909V	Damaging	0.009	Pos-Damg	0.536	D	-2.59
rs750597831	11,108099957,C,T	P80S	T	0.661	B	0.001	N	-0.99
rs750771205	11,108159727,C,T	P1378L	Damaging	0	Pro-Damg	1	D	-7.31
rs750815208	11,108122644,T,G	M563R	T	0.252	B	0.011	N	-1.02
rs750896881	11,108172419,T,C	L1741S	Damaging	0.001	Pro-Damg	1	D	-4.49
rs750897021	11,108124654,T,A	I671K	T	0.306	B	0.005	N	0.09
rs750897021	11,108124654,T,G	I671R	T	0.304	B	0.011	N	-0.6
rs750969764	11,108106460,C,G	S132C	T	0.181	Pos-Damg	0.854	N	-1.11
rs750969764	11,108106460,C,T	S132F	T	0.735	B	0	N	0.22
rs751169467	11,108158424,A,G	D1364G	Damaging	0.027	Pos-Damg	0.578	D	-2.71
rs751218526	11,108129744,T,C	F803S	Damaging	0.006	Pos-Damg	0.553	N	-2.35
rs751234924	11,108202176,C,A	D2507E	T	0.514	B	0.007	N	-0.55
rs751234924	11,108202176,C,T	D2507D	T	1	Not found	Not found	N	0
rs751327903	11,108175536,C,A	F1877L	T	0.659	B	0	N	-1.44
rs751327903	11,108175536,C,G	F1877L	T	0.659	B	0	N	-1.44
rs751515818	11,108124717,G,A	R692H	T	0.416	B	0.002	N	0.76
rs751515818	11,108124717,G,T	R692L	T	0.205	B	0.208	N	-2.22
rs751678973	11,108155148,C,T	T1314I	T	0.313	B	0	N	-1.08
rs751714261	11,108143500,C,A	P1069T	T	0.072	Pro-Damg	0.978	D	-2.5
rs751714261	11,108143500,C,T	P1069S	T	0.164	B	0.437	N	-2.15
rs751792004	11,108180889,C,A	P1922H	Damaging	0.001	Pro-Damg	0.984	D	-3.57
rs751800302	11,108117801,A,C	N338H	T	0.176	B	0.006	N	-1.13
rs751800302	11,108117801,A,G	N338D	T	0.491	B	0.024	N	-0.53
rs752053874	11,108139332,A,G	H945R	Damaging	0.02	Pos-Damg	0.932	N	-2.33
rs752069869	11,108190745,A,C	R2138R	T	1	Not found	Not found	N	0
rs752069869	11,108190745,A,G	R2138G	T	0.085	B	0.117	N	-1.3
rs752099312	11,108141819,G,A	G956E	T	0.661	B	0.005	N	-1.58
rs752459491	11,108168020,C,G	P1639R	Damaging	0.031	Pro-Damg	0.998	D	-3.31
rs752459491	11,108168020,C,T	P1639L	T	0.111	Pos-Damg	0.694	D	-3.47
rs752460436	11,108159739,C,T	P1382L	Damaging	0.012	B	0.021	D	-2.76
rs752527112	11,108098605,G,T	A59S	T	0.09	Pro-Damg	0.965	N	-0.45
rs752559455	11,108163353,T,C	C1482R	T	0.672	B	0	N	-0.03
rs752652869	11,108216571,G,C	L2840F	Damaging	0.041	Pro-Damg	0.993	N	-2.11
rs752886000	11,108203587,A,G	I2629M	T	0.099	B	0.208	N	0.69
rs753109010	11,108121730,A,C	Q513P	Damaging	0.006	Pos-Damg	0.938	D	-2.71
rs753109010	11,108121730,A,G	Q513R	Damaging	0.008	Pos-Damg	0.883	N	-1.43
rs753109010	11,108121730,A,T	Q513L	Damaging	0.003	Pos-Damg	0.883	D	-2.75
rs753262623	11,108201101,C,T	L2490F	Damaging	0	Pro-Damg	1	D	-3.56
rs753269143	11,108164130,C,T	H1568Y	T	1	B	0	N	-0.66
rs753384717	11,108186770,G,T	G2043V	Damaging	0.008	Pos-Damg	0.892	D	-4.57
rs753389616	11,108196804,T,A	F2276Y	T	0.132	B	0.236	N	-0.67
rs753389616	11,108196804,T,G	F2276C	Damaging	0.007	Pro-Damg	1	D	-3.58
rs753717865	11,108154967,G,A	V1254I	T	0.185	B	0.003	N	-0.57
rs753806542	11,108114773,G,A	G197E	Damaging	0	Pro-Damg	1	D	-3.22
rs753806542	11,108114773,G,T	G197V	Damaging	0	Pro-Damg	1	D	-3.62
rs753808755	11,108121635,A,C	L481F	T	0.7	B	0.112	N	0.04
rs753870656	11,108165786,G,A	D1637N	T	0.137	B	0.215	N	-1.07
rs753870656	11,108165786,G,C	D1637H	Damaging	0.047	Pos-Damg	0.661	N	-1.53
rs753870656	11,108165786,G,T	D1637Y	Damaging	0.023	Pos-Damg	0.856	D	-3.13
rs753903558	11,108124753,A,C	N704T	T	0.775	B	0.146	N	-0.31
rs753903558	11,108124753,A,G	N704S	T	1	B	0.005	N	0.23
rs753951063	11,108198467,G,A	M2357I	T	0.209	B	0.155	N	-0.06
rs753951063	11,108198467,G,T	M2357I	T	0.209	B	0.155	N	-0.06
rs754002355	11,108203604,C,A	A2635D	Damaging	0.011	Pro-Damg	0.998	D	-2.58
rs754002355	11,108203604,C,G	A2635G	T	0.171	Pos-Damg	0.482	N	-1.92
rs754002355	11,108203604,C,T	A2635V	T	0.245	Pos-Damg	0.539	N	-0.56
rs754008850	11,108115698,A,T	L282F	T	0.623	B	0.006	N	0.35
rs754033733	11,108099919,A,G	Y67C	Damaging	0.005	Pro-Damg	0.999	D	-3.04
rs754058482	11,108163458,C,T	L1517F	Damaging	0.007	Pro-Damg	1	D	-2.5
rs754181173	11,108163374,C,T	R1489C	Damaging	0.007	Pro-Damg	1	D	-3.16
rs754245181	11,108201125,T,C	S2498P	T	0.417	B	0	N	-0.97
rs754245181	11,108201125,T,G	S2498A	T	0.903	B	0	N	-0.87
rs754267376	11,108128333,G,A	K792K	T	1	Not found	Not found	N	0
rs754267376	11,108128333,G,C	K792N	T	0.117	Pro-Damg	0.997	N	-1.27
rs754275014	11,108115564,A,G	I238V	T	0.399	B	0.002	N	-0.27
rs754395517	11,108202177,G,A	G2508R	T	0.357	Pro-Damg	0.989	N	-0.67
rs754555043	11,108196041,G,A	V2193I	T	0.507	B	0.001	N	-0.14
rs754562056	11,108175459,C,A	Q1852K	T	0.577	B	0.231	N	-1.35
rs754562056	11,108175459,C,T	Not found	Not found	Not found	Not found	Not found	Not found	Not found
rs754738085	11,108139221,T,C	V908A	T	1	B	0	N	-0.61
rs754770960	11,108098509,G,A	V27I	T	0.874	B	0.001	N	-0.17
rs754770960	11,108098509,G,C	V27L	T	0.073	B	0.019	N	-0.84
rs754770960	11,108098509,G,T	V27F	Damaging	0.012	Pos-Damg	0.681	N	-1.81
rs754800755	11,108124609,C,T	T656I	T	0.075	Pos-Damg	0.728	N	-1.74
rs755009196	11,108202751,C,G	S2592C	Damaging	0.001	Pro-Damg	1	D	-2.52
rs755055090	11,108180898,G,A	G1925E	T	0.077	B	0.024	N	-2
rs755055090	11,108180898,G,T	G1925V	Damaging	0.016	B	0.409	D	-2.95
rs755074633	11,108114827,A,C	K215T	T	0.11	B	0.02	N	-1.53
rs755074633	11,108114827,A,G	K215R	T	0.138	B	0.011	N	-0.82
rs755074633	11,108114827,A,T	K215M	Damaging	0.007	Pro-Damg	0.992	N	-2.04
rs755237639	11,108143507,A,G	N1071S	T	1	B	0	N	0.46
rs755274980	11,108163483,T,C	I1525T	T	0.15	B	0.084	N	-2.14
rs755326770	11,108099976,C,T	T86I	Damaging	0.003	Pos-Damg	0.664	N	-2.12
rs755397489	11,108172448,G,C	E1751Q	Damaging	0.026	Pos-Damg	0.892	N	-1.6
rs755418571	11,108200990,C,T	R2453C	T	0.056	Pro-Damg	0.996	D	-4.18
rs755531586	11,108196219,C,A	T2252N	Damaging	0.011	Pos-Damg	0.955	D	-2.63
rs755531586	11,108196219,C,G	T2252S	T	0.14	B	0.19	N	-1.69
rs755561691	11,108235913,T,C	N2985N	T	1	Not found	Not found	N	0
rs755561691	11,108235913,T,G	N2985K	T	0.325	B	0.236	N	-1.91
rs755618506	11,108106490,G,A	S142N	Damaging	0.045	Pro-Damg	1	N	-1.2
rs755656958	11,108196077,T,C	W2205R	Damaging	0	Pro-Damg	1	D	-11.13
rs755694394	11,108186596,T,C	L2018S	Damaging	0.003	Pro-Damg	0.979	D	-3.77
rs755706903	11,108204654,A,C	K2657Q	Damaging	0.04	B	0.037	N	-2.04
rs755706903	11,108204654,A,G	K2657E	Damaging	0.01	Pos-Damg	0.54	N	-2.31
rs755896387	11,108141998,G,A	R981H	Damaging	0.022	B	0.108	N	-1.91
rs755973863	11,108188127,A,G	I2076V	T	0.399	B	0.044	N	-0.29
rs755991658	11,108119737,T,A	S381R	T	0.075	B	0.09	N	-1.31
rs755991658	11,108119737,T,C	S381S	T	1	Not found	Not found	N	0
rs756197350	11,108170515,G,A	A1694T	T	0.905	B	0.001	N	0.25
rs756230327	11,108216581,A,C	I2844L	T	0.334	B	0.003	N	-0.86
rs756230327	11,108216581,A,G	I2844V	T	1	B	0	N	0.39
rs756522395	11,108128211,C,G	L752V	Damaging	0.018	Pro-Damg	0.999	N	-1.17
rs756522395	11,108128211,C,T	L752L	T	1	Not found	Not found	N	0
rs756626462	11,108192057,G,A	R2161H	T	0.073	Pos-Damg	0.503	N	-0.61
rs756782634	11,108123633,C,A	P631Q	Damaging	0.009	B	0.001	N	-2.07
rs756898113	11,108196812,A,G	K2279E	Damaging	0.003	Pro-Damg	1	N	-2.31
rs756899044	11,108224558,G,C	D2913H	Damaging	0	Pro-Damg	1	D	-5.33
rs756899044	11,108224558,G,T	D2913Y	Damaging	0	Pro-Damg	1	D	-7.16
rs756969590	11,108099993,A,G	K92E	Damaging	0.012	Pro-Damg	0.999	N	-1.2
rs756979112	11,108178652,G,A	L1901L	T	1	Not found	Not found	N	0
rs756979112	11,108178652,G,C	L1901F	T	0.099	Pos-Damg	0.52	N	-1.66
rs757151992	11,108137934,G,T	V835L	T	0.286	B	0.001	N	-0.73
rs757172522	11,108159745,A,C	H1384P	Damaging	0.025	Pos-Damg	0.557	D	-3.42
rs757172522	11,108159745,A,G	H1384R	Damaging	0.033	Pos-Damg	0.557	D	-2.79
rs757201878	11,108151832,G,A	Q1171Q	T	1	Not found	Not found	N	0
rs757201878	11,108151832,G,T	Q1171H	Damaging	0.008	Pro-Damg	0.998	N	-1.81
rs757260641	11,108124755,T,A	Y705N	T	0.13	Pro-Damg	0.989	N	-2.13
rs757260641	11,108124755,T,C	Y705H	T	0.239	Pro-Damg	0.989	N	-1.54
rs757293178	11,108198484,A,T	K2363M	Damaging	0.001	Pro-Damg	1	D	-4.85
rs757381170	11,108168037,G,T	V1645L	T	0.222	B	0.005	N	-0.92
rs757486696	11,108119760,T,C	I389T	Damaging	0.004	B	0.321	D	-2.7
rs757486696	11,108119760,T,G	I389R	Damaging	0.001	B	0.089	D	-3.42
rs757617016	11,108143534,A,T	D1080V	Damaging	0	Pro-Damg	1	D	-5.55
rs758038580	11,108186805,A,G	I2055V	T	0.322	B	0.028	N	-0.45
rs758056561	11,108121747,G,A	V519I	T	0.442	B	0.001	N	-0.38
rs758056561	11,108121747,G,T	V519F	T	0.3	B	0.306	N	-1.41
rs758180727	11,108160339,A,G	Q1416R	Damaging	0.005	Pro-Damg	0.982	D	-3.17
rs758351633	11,108199887,T,A	F2410Y	T	0.266	Pro-Damg	0.984	N	-1.28
rs758351633	11,108199887,T,C	F2410S	Damaging	0.001	Pro-Damg	1	D	-7.08
rs758405529	11,108154977,C,T	P1257L	Damaging	0	Pro-Damg	1	D	-7.02
rs758446561	11,108190733,T,C	S2134P	Damaging	0.035	Pro-Damg	0.994	D	-2.85
rs758483894	11,108100020,G,A	V101I	T	0.222	B	0.042	N	-0.02
rs758609900	11,108213958,C,G	L2760V	Damaging	0.012	Pro-Damg	0.997	N	-2.32
rs758609900	11,108213958,C,T	L2760F	T	0.189	Pos-Damg	0.735	N	-2.38
rs758614348	11,108199923,A,G	E2422G	T	0.053	Pos-Damg	0.928	N	-2.45
rs758708495	11,108143273,A,G	E1031G	T	0.142	B	0.007	D	-2.87
rs758708495	11,108143273,A,T	E1031V	Damaging	0.02	Pos-Damg	0.704	D	-3.03
rs758843096	11,108203614,G,T	W2638C	Damaging	0.047	Pro-Damg	0.999	D	-3.68
rs758864982	11,108126960,C,G	L715V	T	0.107	B	0.174	N	-0.95
rs758864982	11,108126960,C,T	L715F	T	0.053	B	0.037	N	-1.53
rs758908522	11,108175538,C,T	S1878L	Damaging	0.047	Pos-Damg	0.867	N	-2.37
rs758924620	11,108172424,A,C	T1743P	Damaging	0.006	Pro-Damg	1	D	-4.11
rs758924620	11,108172424,A,G	T1743A	T	0.055	Pos-Damg	0.907	D	-2.87
rs758955717	11,108139252,T,A	F918L	T	0.189	Pos-Damg	0.915	N	-1.88
rs758955717	11,108139252,T,C	F918F	T	1	Not found	Not found	N	0
rs758962678	11,108099960,A,G	N81D	T	0.155	B	0.379	N	-1.15
rs759029705	11,108188231,C,G	D2110E	Damaging	0.03	B	0.092	N	-2.39
rs759029705	11,108188231,C,T	D2110D	T	1	Not found	Not found	N	0
rs759289039	11,108165738,C,G	L1621V	Damaging	0	Pro-Damg	1	D	-2.72
rs759289039	11,108165738,C,T	L1621L	T	1	Not found	Not found	N	0
rs759340881	11,108163414,G,T	C1502F	Damaging	0.001	Pro-Damg	0.992	D	-5.61
rs759392666	11,108203571,G,C	C2624S	T	0.173	Pro-Damg	0.966	D	-2.67
rs759439613	11,108199748,G,C	A2364P	Damaging	0.005	Pro-Damg	1	D	-3.58
rs759655842	11,108216555,G,A	C2835Y	T	0.479	Pro-Damg	0.992	N	-0.41
rs759673348	11,108106433,A,G	Y123C	Damaging	0.031	Pro-Damg	0.998	D	-2.95
rs759753186	11,108186763,A,G	M2041V	T	1	B	0	N	-1.35
rs759779781	11,108205751,A,G	E2689G	T	0.085	B	0.215	N	-1.99
rs759951393	11,108151786,C,T	T1156M	T	0.338	B	0.001	N	-0.31
rs760060843	11,108173716,C,A	T1819K	Damaging	0.007	B	0.357	N	-1.77
rs760060843	11,108173716,C,T	T1819I	T	0.488	B	0	N	0.53
rs760191806	11,108121584,G,A	L464L	T	1	Not found	Not found	N	0
rs760191806	11,108121584,G,T	L464F	T	0.342	Pos-Damg	0.949	N	-1.42
rs760471526	11,108099913,A,C	Q65P	Damaging	0.038	Pro-Damg	0.987	N	-1.98
rs760471526	11,108099913,A,G	Q65R	T	0.482	Pos-Damg	0.497	N	-0.56
rs760542469	11,108163425,G,A	V1506M	Damaging	0.006	Pro-Damg	0.993	N	-0.79
rs760542469	11,108163425,G,T	V1506L	T	0.365	B	0.022	N	-0.29
rs760676955	11,108121532,G,A	R447Q	Damaging	0.013	Pro-Damg	0.999	N	-1.44
rs760676955	11,108121532,G,T	R447L	Damaging	0.006	Pro-Damg	0.999	D	-2.54
rs760880388	11,108098606,C,T	A59V	Damaging	0.028	Pro-Damg	0.965	N	-1.2
rs760928285	11,108153473,C,T	R1205C	T	0.131	B	0.001	N	-0.7
rs760955058	11,108218084,T,C	I2888T	Damaging	0	Pro-Damg	1	D	-4.31
rs761005590	11,108115684,G,A	V278I	T	0.476	B	0.001	N	-0.32
rs761005590	11,108115684,G,T	V278F	T	0.088	Pos-Damg	0.528	N	-0.47
rs761123780	11,108158411,A,T	S1360C	Damaging	0.021	Pos-Damg	0.953	N	-1.5
rs761137313	11,108106438,A,G	M125V	T	0.231	B	0.013	N	-0.65
rs761170769	11,108106543,T,C	S160P	Damaging	0.029	B	0.002	N	-1.64
rs761170769	11,108106543,T,G	S160A	T	0.151	B	0.003	N	-0.81
rs761197886	11,108165702,A,G	T1609A	T	0.155	B	0.084	N	-1.84
rs761225071	11,108160427,T,C	F1445F	T	1	Not found	Not found	N	0
rs761225071	11,108160427,T,G	F1445L	Damaging	0	Pos-Damg	0.855	D	-4.84
rs761251711	11,108138010,A,G	D860G	T	0.117	B	0.01	D	-3.31
rs761251711	11,108138010,A,T	D860V	Damaging	0.005	B	0.061	D	-4.26
rs761352263	11,108196912,T,C	L2312P	Damaging	0.001	Pro-Damg	1	D	-6.34
rs761491947	11,108124545,C,T	H635Y	T	0.303	B	0	N	-1.16
rs761587154	11,108198376,A,G	N2327S	Damaging	0.025	Pos-Damg	0.587	N	-0.92
rs761587154	11,108198376,A,T	N2327I	Damaging	0.001	Pos-Damg	0.953	N	-2.31
rs761590782	11,108143471,C,T	A1059V	Damaging	0.007	Pos-Damg	0.912	N	-1.75
rs761625350	11,108213949,G,A	V2757M	Damaging	0	Pro-Damg	1	D	-2.52
rs761625350	11,108213949,G,C	V2757L	Damaging	0	Pro-Damg	1	N	-2.45
rs761629908	11,108214069,A,G	S2797G	T	0.239	B	0.009	N	-2.12
rs761790685	11,108202715,G,A	R2580K	T	0.283	B	0.002	N	-0.39
rs761850075	11,108121660,A,G	I490V	T	0.927	B	0	N	-0.14
rs761936549	11,108100018,T,A	Not found	Not found	Not found	Not found	Not found	Not found	Not found
rs761936549	11,108100018,T,C	L100S	Damaging	0.006	Pro-Damg	0.997	N	-1.97
rs762001297	11,108186563,A,C	E2007A	Damaging	0.008	Pos-Damg	0.842	D	-4.95
rs762001297	11,108186563,A,G	E2007G	Damaging	0.003	Pro-Damg	0.974	D	-5.48
rs762018538	11,108123579,T,C	V613A	T	0.417	Pro-Damg	0.976	N	-1.6
rs762018538	11,108123579,T,G	V613G	T	0.273	B	0.355	D	-3.05
rs762078586	11,108139317,A,C	K940T	Damaging	0.007	Pos-Damg	0.79	N	-2.41
rs762078586	11,108139317,A,G	K940R	T	0.105	B	0.008	N	-1.17
rs762078586	11,108139317,A,T	K940I	Damaging	0.003	Pos-Damg	0.884	D	-3.41
rs762083530	11,108165729,C,G	R1618G	Damaging	0.009	B	0.418	D	-4.04
rs762083530	11,108165729,C,T	Not found	Not found	Not found	Not found	Not found	Not found	Not found
rs762132832	11,108163462,A,C	H1518P	Damaging	0.02	Pos-Damg	0.883	D	-3.73
rs762132832	11,108163462,A,G	H1518R	T	0.137	B	0.003	N	-2.47
rs762154857	11,108206609,A,C	Q2730P	Damaging	0	Pro-Damg	1	D	-5.18
rs762154857	11,108206609,A,G	Q2730R	Damaging	0	Pro-Damg	1	D	-3.45
rs762179829	11,108117778,G,A	G330E	Damaging	0.03	Pro-Damg	1	N	-2.28
rs762179829	11,108117778,G,C	G330A	T	0.282	Pro-Damg	0.998	N	-1.33
rs762304746	11,108175529,G,A	R1875Q	T	0.38	B	0.044	N	-0.34
rs762304746	11,108175529,G,C	R1875P	T	0.053	Pos-Damg	0.918	N	-2.25
rs762382111	11,108098564,G,A	R45Q	T	0.308	B	0.011	N	-0.59
rs762394404	11,108124713,G,C	D691H	T	0.066	B	0.257	N	-1.05
rs762427092	11,108198390,C,G	L2332V	T	0.298	B	0.005	N	-0.64
rs762427092	11,108198390,C,T	L2332F	T	0.072	Pos-Damg	0.841	N	-1.51
rs762557654	11,108119700,C,T	S369F	T	0.117	Pos-Damg	0.807	N	-1
rs762744146	11,108214098,G,A	M2806I	T	0.269	B	0.001	N	-1.4
rs762744146	11,108214098,G,T	M2806I	T	0.269	B	0.001	N	-1.4
rs762765902	11,108203547,T,C	M2616T	Damaging	0.003	Pro-Damg	0.964	D	-2.82
rs762810180	11,108143489,G,A	G1065E	T	0.259	B	0.001	N	-1.18
rs762810180	11,108143489,G,T	G1065V	Damaging	0.02	Pos-Damg	0.498	D	-2.65
rs762998620	11,108115532,C,G	Not found	Not found	Not found	Not found	Not found	Not found	Not found
rs762998620	11,108115532,C,T	S227L	Damaging	0.045	B	0	N	-0.81
rs763020528	11,108173678,A,G	I1806M	Damaging	0.011	Pos-Damg	0.892	N	-2.11
rs763064034	11,108141800,C,G	L950V	T	0.277	Pos-Damg	0.849	N	-0.69
rs763064034	11,108141800,C,T	L950F	Damaging	0.009	Pro-Damg	1	N	-2.04
rs763152094	11,108236143,A,C	S3027R	Damaging	0	Pro-Damg	1	D	-3.94
rs763152094	11,108236143,A,G	S3027G	Damaging	0	Pro-Damg	1	D	-3.41
rs763161651	11,108205700,A,C	D2672A	Damaging	0	Pro-Damg	1	D	-4.14
rs763161651	11,108205700,A,G	D2672G	Damaging	0	Pro-Damg	1	D	-3.77
rs763457172	11,108168014,A,G	D1637G	T	0.176	B	0	N	-0.66
rs763457172	11,108168014,A,T	D1637V	Damaging	0.047	B	0.215	D	-2.73
rs763730862	11,108154958,T,C	C1251R	T	0.447	B	0.393	D	-2.79
rs763773991	11,108235873,A,G	Q2972R	T	0.163	B	0.185	N	-1.31
rs763839047	11,108196902,C,G	L2309V	Damaging	0.03	Pro-Damg	0.984	N	-1.62
rs763839047	11,108196902,C,T	L2309L	T	1	Not found	Not found	N	0
rs764003317	11,108206651,A,C	E2744A	Damaging	0.009	Pos-Damg	0.879	D	-4.11
rs764048041	11,108115690,A,G	I280V	T	0.431	B	0.001	N	-0.19
rs764080545	11,108114772,G,A	G197R	Damaging	0	Pro-Damg	1	D	-3.25
rs764389018	11,108172385,C,A	R1730R	T	1	Not found	Not found	N	0
rs764389018	11,108172385,C,G	R1730G	T	0.288	Pro-Damg	1	D	-4.05
rs764389018	11,108172385,C,T	Not found	Not found	Not found	Not found	Not found	Not found	Not found
rs764409952	11,108139232,C,G	Q912E	T	0.253	Pos-Damg	0.836	N	-1.04
rs764409952	11,108139232,C,T	Not found	Not found	Not found	Not found	Not found	Not found	Not found
rs764478418	11,108201120,G,A	G2496E	T	0.589	B	0.384	N	-0.66
rs764478418	11,108201120,G,C	G2496A	T	0.577	B	0.004	N	-0.71
rs764522350	11,108175433,C,G	P1843R	Damaging	0	Pro-Damg	1	D	-7.57
rs764522350	11,108175433,C,T	P1843L	Damaging	0	Pro-Damg	1	D	-8.51
rs764538548	11,108128326,G,C	C790S	T	0.316	B	0.012	N	-2.26
rs764564211	11,108158412,G,A	S1360N	T	0.198	B	0	N	-0.78
rs764564211	11,108158412,G,T	S1360I	T	0.074	Pos-Damg	0.468	N	-0.71
rs764713766	11,108192125,A,G	S2184G	T	0.062	B	0.109	N	-1.91
rs764778912	11,108224560,T,C	D2913D	T	1	Not found	Not found	N	0
rs764778912	11,108224560,T,G	D2913E	Damaging	0	Pro-Damg	1	D	-3.15
rs764784077	11,108173730,C,T	L1824F	Damaging	0	Pro-Damg	1	N	-2.32
rs764787081	11,108160439,A,C	L1449F	Damaging	0.006	Pos-Damg	0.543	D	-3.17
rs764842086	11,108138021,A,C	S864R	Damaging	0.026	B	0.001	N	-1.65
rs764842086	11,108138021,A,G	S864G	T	0.156	B	0	N	-1.23
rs764859160	11,108196919,A,C	Q2314H	Damaging	0.042	Pro-Damg	0.973	N	-1.05
rs764906663	11,108213955,C,G	P2759A	Damaging	0	Pro-Damg	1	D	-6.9
rs764906663	11,108213955,C,T	P2759S	Damaging	0	Pro-Damg	1	D	-6.9
rs765027485	11,108178656,A,G	K1903E	Damaging	0.025	Pos-Damg	0.941	N	-1.82
rs765195241	11,108163467,A,C	I1520L	Damaging	0.01	Pos-Damg	0.937	N	-1.69
rs765195241	11,108163467,A,T	I1520F	Damaging	0.002	B		D	-3.55
rs765538231	11,108154975,T,A	I1256I	T	1	B		N	0
rs765538231	11,108154975,T,G	I1256M	Damaging	0.003	B		N	-1.93
rs765548443	11,108200955,T,C	V2441A	Damaging	0.003	Pro-Damg	0.996	N	-1.41
rs765654550	11,108202250,T,C	M2532T	T	1	B	0.001	N	-0.46
rs765713557	11,108160463,A,C	L1457F	T	0.064	Pos-Damg	0.937	N	-2
rs765713557	11,108160463,A,G	L1457L	T	1	Not found	Not found	N	0
rs765759912	11,108165730,G,A	R1618Q	Damaging	0.025	B	0.026	N	-1.88
rs765759912	11,108165730,G,T	R1618L	Damaging	0.011	B	0.264	D	-3.16
rs765847854	11,108122746,C,T	P597L	T	0.063	Pos-Damg	0.779	D	-3.14
rs765848319	11,108141981,T,A	N975K	T	0.842	B	0	N	-1.39
rs765848319	11,108141981,T,C	N975N	T	0.715	Not found	Not found	N	0
rs765965513	11,108124716,C,T	R692C	T	0.129	B	0.01	N	-2.16
rs766034066	11,108106454,A,G	D130G	Damaging	0.013	Pro-Damg	0.997	D	-2.69
rs766053182	11,108170497,A,G	I1688V	T	0.205	B	0	N	-0.73
rs766226370	11,108153603,A,C	Y1248S	Damaging	0.002	Pro-Damg	1	D	-5.75
rs766226370	11,108153603,A,G	Y1248C	Damaging	0.001	Pro-Damg	1	D	-5.48
rs766226370	11,108153603,A,T	Y1248F	T	0.225	Pos-Damg	0.66	N	-1.69
rs766342338	11,108143494,G,T	D1067Y	Damaging	0.006	Pos-Damg	0.859	D	-3.61
rs766351395	11,108203565,C,G	A2622G	T	0.398	B	0.007	N	-0.59
rs766351395	11,108203565,C,T	A2622V	T	0.151	B	0.384	N	-1.52
rs766595156	11,108121697,C,G	A502G	T	0.372	B	0.039	N	-0.95
rs766730487	11,108205717,G,A	G2678R	T	0.07	B	0.001	N	0.13
rs766757573	11,108123615,A,T	N625I	T	0.106	B	0.028	N	-1.27
rs766901049	11,108178632,C,A	H1895N	T	0.34	B	0	N	-0.47
rs766901049	11,108178632,C,G	H1895D	T	0.246	B	0.017	N	-1.05
rs766901049	11,108178632,C,T	H1895Y	T	1	B	0.038	N	-1.16
rs766951228	11,108100042,C,G	A108G	Damaging	0.017	Pos-Damg	0.783	N	-1.64
rs767123895	11,108202284,T,C	N2543N	T	1	Not found	Not found	N	0
rs767406075	11,108188118,C,G	L2073V	Damaging	0.012	Pro-Damg	0.998	N	-2.23
rs767406075	11,108188118,C,T	L2073F	Damaging	0.011	Pro-Damg	1	D	-3.12
rs767466937	11,108163419,A,G	T1504A	T	0.712	B	0	N	0.21
rs767494363	11,108199766,A,G	N2370D	T	0.741	B	0	N	-1.01
rs767507047	11,108235819,A,G	Y2954C	Damaging	0	Pro-Damg	1	D	-7.92
rs767670019	11,108203580,A,C	Y2627S	Damaging	0	Pro-Damg	1	D	-5.41
rs767670019	11,108203580,A,G	Y2627C	Damaging	0	Pro-Damg	1	D	-5.08
rs767841041	11,108170511,A,C	K1692N	Damaging	0.016	B	0.215	N	-1.52
rs767845728	11,108216568,C,A	F2839L	Damaging	0.007	Pro-Damg	0.999	D	-4.61
rs767845728	11,108216568,C,G	F2839L	Damaging	0.007	Pro-Damg	0.999	D	-4.61
rs767939328	11,108186769,G,A	G2043S	T	0.097	Pos-Damg	0.54	N	-1.79
rs767981230	11,108164106,A,C	K1560Q	T	0.112	B	0.363	N	-0.74
rs767981230	11,108164106,A,G	K1560E	T	0.252	B	0.022	N	-0.55
rs768038315	11,108121760,T,A	F523Y	Damaging	0.018	Pos-Damg	0.671	N	-0.95
rs768038315	11,108121760,T,C	F523S	Damaging	0.011	Pos-Damg	0.671	N	-2.36
rs768038315	11,108121760,T,G	F523C	Damaging	0.01	Pro-Damg	0.988	N	-1.94
rs768155385	11,108192075,A,G	Y2167C	T	0.067	Pos-Damg	0.722	D	-2.55
rs768318076	11,108100011,A,C	S98R	T	0.196	Pos-Damg	0.906	N	-1.05
rs768362411	11,108143542,C,T	H1083Y	Damaging	0.004	Pro-Damg	1	N	-2.24
rs768461085	11,108201015,G,A	R2461H	Damaging	0.028	Pro-Damg	1	N	-1.75
rs768461085	11,108201015,G,C	R2461P	Damaging	0.027	Pro-Damg	1	D	-2.9
rs768480943	11,108117836,G,A	M349I	T	0.247	B	0.007	N	-0.86
rs768490475	11,108151726,A,G	H1136R	T	0.585	B	0	N	-0.51
rs768720856	11,108117766,T,C	I326T	Damaging	0.022	Pro-Damg	0.961	N	-1.19
rs768720856	11,108117766,T,G	I326R	Damaging	0.006	Pro-Damg	0.994	N	-1.97
rs768726324	11,108159801,A,G	S1403G	Damaging	0.006	B	0.963	D	-2.55
rs768726324	11,108159801,A,T	S1403C	Damaging	0.005	Pos-Damg	1	D	-2.64
rs768791795	11,108196167,A,G	M2235V	T	0.878	B	0.002	N	-0.35
rs768820804	11,108173583,T,G	L1775V	T	0.366	B	0.932	N	-0.31
rs768874297	11,108126967,G,A	R717Q	T	0.344	Pro-Damg	0.008	N	-0.6
rs768874297	11,108126967,G,C	R717P	Damaging	0.01	Pro-Damg	0.895	D	-2.6
rs769106895	11,108153474,G,A	R1205H	T	0.253	Pro-Damg	0.001	N	-0.1
rs769142993	11,108202225,G,C	A2524P	Damaging	0	Pro-Damg	1	D	-4.35
rs769142993	11,108202225,G,T	A2524S	Damaging	0	Pro-Damg	1	D	-2.66
rs769166447	11,108115595,G,A	R248Q	Damaging	0	Pro-Damg	1	D	-2.5
rs769166447	11,108115595,G,T	R248L	Damaging	0	B	1	D	-4.4
rs769207177	11,108203541,C,A	P2614H	Damaging	0.022	Pos-Damg	0.533	N	-1.16
rs769207177	11,108203541,C,T	P2614L	T	0.096	Pro-Damg	0.032	N	-1.44
rs769214234	11,108121465,G,A	A425T	T	0.671	Pro-Damg	0.004	N	0.2
rs769214234	11,108121465,G,T	A425S	T	0.813	Pro-Damg	0	N	0.32
rs769338089	11,108124704,G,A	E688K	T	0.178	Pro-Damg	0.098	N	-1.1
rs769338089	11,108124704,G,C	E688Q	T	0.099	Pos-Damg	0.895	N	-0.53
rs769548726	11,108236132,G,A	G3023D	Damaging	0.013	Pro-Damg	1	D	-5.76
rs769548726	11,108236132,G,T	G3023V	Damaging	0.001	Pro-Damg	1	D	-7.45
rs769606850	11,108198378,C,A	P2328T	T	0.255	Pro-Damg	0.109	N	-1.17
rs769606850	11,108198378,C,G	P2328A	T	0.579	Pro-Damg	0.002	N	-0.9
rs769606850	11,108198378,C,T	P2328S	T	0.761	Pro-Damg	0	N	-0.76
rs769722643	11,108201032,G,A	V2467I	T	0.128	B	0.906	N	-0.07
rs769731317	11,108115524,G,C	K224N	Damaging	0.006	Pos-Damg	0.989	N	-1.57
rs769731317	11,108115524,G,T	K224N	Damaging	0.006	Pro-Damg	0.989	N	-1.57
rs769853739	11,108151758,A,G	I1147V	T	0.3	Pro-Damg	0.003	N	0.12
rs769857066	11,108143552,G,A	R1086H	Damaging	0.024	Pro-Damg	0.994	D	-3.04
rs769857066	11,108143552,G,T	R1086L	Damaging	0.045	Pro-Damg	0.577	D	-4.11
rs769872474	11,108173670,A,T	I1804F	T	0.069	B	0.07	N	-0.56
rs769959260	11,108224595,G,A	G2925D	Damaging	0	Pos-Damg	1	D	-6.03
rs769959260	11,108224595,G,C	G2925A	Damaging	0	Pos-Damg	1	D	-5.17
rs769959260	11,108224595,G,T	G2925V	Damaging	0	Pro-Damg	1	D	-7.76
rs769980220	11,108160396,A,C	K1435T	Damaging	0.005	B	0.232	D	-3.74
rs769980220	11,108160396,A,G	K1435R	T	0.527	Pro-Damg	0.001	N	-0.75
rs770028453	11,108121589,A,G	Q466R	Damaging	0.042	Pos-Damg	0.993	N	-1.62
rs770183693	11,108155034,A,C	Q1276P	T	0.067	Pos-Damg	0.203	N	-2.37
rs770183693	11,108155034,A,G	Q1276R	Damaging	0.041	B	0.112	N	-1.18
rs770377706	11,108123582,G,C	S614T	T	0.287	Pos-Damg	0.988	N	-0.79
rs770377706	11,108123582,G,T	S614I	T	0.115	Pro-Damg	0.999	D	-2.67
rs770565353	11,108139279,G,T	L927F	Damaging	0	Pro-Damg	1	D	-2.77
rs770573462	11,108121506,A,C	I438I	T	1	B		N	0
rs770573462	11,108121506,A,G	I438M	Damaging	0.033	Pos-Damg	0.855	N	-0.8
rs770590652	11,108163486,C,A	P1526H	Damaging	0.001	B	1	D	-6.21
rs770590652	11,108163486,C,T	P1526L	Damaging	0.003	Pos-Damg	0.978	D	-7.19
rs770610463	11,108139191,T,C	L898S	Damaging	0.001	Pro-Damg	1	D	-2.81
rs770641163	11,108235935,C,G	R2993G	Damaging	0.008	B	0.005	D	-2.53
rs770722380	11,108183170,C,A	T1984K	T	0.109	Pro-Damg	0.698	N	-2.44
rs770722380	11,108183170,C,G	T1984R	T	0.096	Pro-Damg	0.698	D	-2.72
rs770911276	11,108122676,G,C	E574Q	Damaging	0.043	Pos-Damg	0.993	N	-0.94
rs770911662	11,108115615,G,A	G255R	Damaging	0	Pos-Damg	1	D	-3.62
rs770911662	11,108115615,G,C	G255R	Damaging	0	Pro-Damg	1	D	-3.62
rs771166271	11,108106466,G,A	G134D	T	0.286	Pos-Damg	0.119	N	-1.47
rs771554153	11,108164058,T,C	Y1544H	Damaging	0	Pos-Damg	0.959	D	-4.06
rs771685059	11,108114838,T,C	C219R	T	0.398	B	0	N	-0.16
rs771781881	11,108213992,C,G	T2771R	Damaging	0.036	Pro-Damg	0.863	N	-1.05
rs771781881	11,108213992,C,T	T2771I	Damaging	0.037	Pos-Damg	0.978	D	-2.54
rs771877351	11,108123555,A,G	H605R	T	0.396	Pro-Damg	0.704	N	-1.33
rs772054979	11,108139298,A,G	S934G	T	0.088	Pos-Damg	0.084	N	-1.47
rs772173522	11,108106497,A,G	I144M	Damaging	0.007	Pro-Damg	0.997	N	-1.54
rs772261410	11,108175500,T,A	H1865Q	T	0.667	Pro-Damg	0	N	-1.29
rs772261410	11,108175500,T,C	H1865H	T	1			N	0
rs772376652	11,108170543,T,C	F1703S	T	0.13	Pos-Damg	0.605	D	-2.88
rs772393149	11,108124693,A,G	Q684R	T	0.073	B	0.971	N	-1.26
rs772555314	11,108160507,T,C	L1472S	Damaging	0.001	Pos-Damg	1	D	-4.86
rs772591447	11,108098557,C,A	L43I	Damaging	0	Pro-Damg	1	N	-0.73
rs772591447	11,108098557,C,G	L43V	Damaging	0	Pro-Damg	1	N	-1.2
rs772591447	11,108098557,C,T	L43L	T	1			N	0
rs772621438	11,108225556,G,A	M2935I	T	0.053	Pro-Damg	0.995	N	-2.49
rs772724024	11,108153479,G,C	E1207Q	T	0.268	B	0.751	N	-0.56
rs772833802	11,108163397,C,G	D1496E	T	0.077	B	0.866	N	-2.05
rs772850740	11,108163397,C,T	D1496D	T	1			N	0
rs772850740	11,108192097,C,A	S2174R	T	0.18	B	0.027	N	-1.89
rs772850740	11,108192097,C,T	S2174S	T	0.919			N	0
rs772874616	11,108122584,C,G	T543S	T	0.449	B	0	N	-0.79
rs772874616	11,108122584,C,T	T543I	Damaging	0.029	B	0.181	N	-1.71
rs772992098	11,108214073,C,A	A2798D	T	0.111	Pos-Damg	0.25	N	-1.94
rs772992098	11,108214073,C,T	A2798V	T	0.103	Pos-Damg	0.025	N	-2.1
rs773159296	11,108203543,C,G	Q2615E	T	0.652	Pro-Damg	0.001	N	-0.06
rs773546064	11,108173677,T,C	I1806T	Damaging	0.002	Pro-Damg	0.892	D	-3.99
rs773891864	11,108188224,A,C	Q2108P	T	0.178	Pos-Damg	0.999	D	-3.43
rs773891864	11,108188224,A,G	Q2108R	T	0.252	B	0.999	N	-2.01
rs773891864	11,108188224,A,T	Q2108L	T	1	B	0.854	D	-3.47
rs773895161	11,108121511,C,A	S440Y	T	0.696	B	0	N	0.58
rs773895161	11,108121511,C,T	S440F	T	0.181	B	0	N	-0.53
rs773944604	11,108201090,G,A	R2486Q	Damaging	0	B	1	D	-3.62
rs773964990	11,108150225,C,G	Q1098E	T	0.128	Pro-Damg	0.972	N	-0.89
rs774118570	11,108203567,C,A	L2623I	Damaging	0	Pro-Damg	1	N	-1.33
rs774118570	11,108203567,C,G	L2623V	Damaging	0	B	1	N	-2.03
rs774118570	11,108203567,C,T	L2623F	Damaging	0	B	1	D	-3.06
rs774171813	11,108216548,T,C	Y2833H	T	0.554	B	0.56	N	0.97
rs774185390	11,108098570,C,T	S47L	Damaging	0.029	B	0.044	N	-2.14
s774197372	11,108143570,C,T	S1092L	Damaging	0.034	Pro-Damg	0.004	D	-2.5
rs774260725	11,108183183,C,G	S1988R	Damaging	0.016	B	0.974	N	-2.32
rs774260725	11,108183183,C,T	S1988S	T	1			N	0
rs774281788	11,108201096,G,A	C2488Y	Damaging	0.001	Pos-Damg	1	D	-5.39
rs774281788	11,108201096,G,T	C2488F	Damaging	0.001	B	1	D	-5.19
rs774312539	11,108202202,T,G	F2516C	Damaging	0	B	1	D	-7
rs774334667	11,108205834,A,C	K2717Q	Damaging	0	B	1	D	-3.45
rs774395596	11,108139192,A,C	L898F	Damaging	0.007	B	1	N	-2.09
rs774395596	11,108139192,A,T	L898F	Damaging	0.007	B	1	N	-2.09
rs774886013	11,108160413,A,C	I1441L	T	0.207	B	0.001	N	-0.42
rs774886013	11,108160413,A,G	I1441V	T	0.52	B	0.001	N	-0.05
rs774935453	11,108143332,G,C	E1051Q	T	0.174	Pos-Damg	0.7	N	-0.77
rs774993357	11,108186756,C,A	H2038Q	Damaging	0	B	1	D	-5.38
rs774993357	11,108186756,C,G	H2038Q	Damaging	0	Pro-Damg	1	D	-5.38
rs774993357	11,108186756,C,T	H2038H	T	1			N	0
rs775045299	11,108151774,C,A	S1152Y	Damaging	0.002	B	0.859	N	-2.34
rs775045299	11,108151774,C,G	S1152C	Damaging	0.007	B	0.668	N	-1.32
rs775185939	11,108218074,C,T	L2885F	Damaging	0	B	1	D	-2.91
rs775248597	11,108099912,C,G	Q65E	T	0.068	B	0.299	N	-0.75
rs775266056	11,108126993,C,A	L726I	Damaging	0.015	Pro-Damg	0.993	N	-0.9
rs775266056	11,108126993,C,T	L726F	Damaging	0.008	B	0.999	N	-2
rs775293524	11,108213995,G,A	G2772E	Damaging	0.045	B	0.999	D	-3.63
rs775293524	11,108213995,G,C	G2772A	Damaging	0.006	B	1	D	-3.51
rs775371838	11,108139218,G,A	C907Y	T	0.124	B	0.836	D	-3.38
rs775371838	11,108139218,G,T	C907F	T	0.285	Pos-Damg	0.836	D	-3.19
rs775621333	11,108202221,A,G	Q2522Q	T	1			N	0
rs775621333	11,108202221,A,T	Q2522H	Damaging	0	B	1	D	-4.65
rs775644968	11,108129791,T,C	C819R	Damaging	0.013	B	0.956	D	-3.11
rs775688446	11,108159773,C,A	I1393I	T	1			N	0
rs775688446	11,108159773,C,G	I1393M	T	0.1	B	0.55	N	-0.97
rs775688446	11,108159773,C,T	I1393I	T	1			N	0
rs775767808	11,108119673,A,G	D360G	T	0.318	Pos-Damg	0.297	N	-1.58
rs775767808	11,108119673,A,T	D360V	Damaging	0.005	B	0.857	D	-2.85
rs775823407	11,108225571,C,G	N2940K	Damaging	0.014	B	0.273	N	-2.05
rs775823407	11,108225571,C,T	N2940N	T	1			N	0
rs775890872	11,108124694,G,C	Q684H	Damaging	0.023	Pos-Damg	0.991	N	-1.6
rs775921052	11,108183218,G,A	S2000N	T	0.311	B	0.816	N	-1.12
rs776227830	11,108115520,A,G	E223G	Damaging	0	B	1	D	-3.2
rs776266049	11,108200949,T,C	V2439A	T	0.156	B	0.196	N	-1.47
rs776309355	11,108173635,T,C	I1792T	T	0.611	B	0	N	1.02
rs776309355	11,108173635,T,G	I1792R	T	0.515	Pro-Damg	0	N	0.75
rs776349773	11,108114845,G,A	R221K	Damaging	0.021	B	0.993	N	-1
rs776349773	11,108114845,G,C	R221T	Damaging	0.006	B	0.998	N	-2.44
rs776412334	11,108121658,G,A	C489Y	T	0.1	Pro-Damg	0.013	N	-1.39
rs776412334	11,108121658,G,T	C489F	T	0.104	B	0	N	-1.43
rs776429506	11,108196908,A,G	I2311V	Damaging	0.019	B	0.981	N	-0.87
rs776581499	11,108159829,C,T	P1412L	Damaging	0.017	Pro-Damg	0.995	D	-6.54
rs776761757	11,108164090,C,A	N1554K	T	0.465	Pro-Damg	0.002	N	-0.86
rs776761757	11,108164090,C,T	N1554N	T	1			N	0
rs776911505	11,108122731,G,A	S592N	T	0.26	Pos-Damg	0	N	-0.62
rs776911505	11,108122731,G,T	S592I	T	0.087	Pro-Damg	0.257	N	-1.49
rs776938735	11,108117775,G,A	R329K	T	0.162	B	0.999	N	-0.9
rs776938735	11,108117775,G,C	R329T	Damaging	0.004	B	1	N	-2.38
rs777164914	11,108196874,C,G	F2299L	Damaging	0.016	B	0.998	D	-3.33
rs777164914	11,108196874,C,T	F2299F	T	1			N	0
rs777301065	11,108122665,T,C	F570S	T	0.466	Pro-Damg	0	N	-0.73
rs777423778	11,108199856,A,C	R2400R	T	1			N	0
rs777423778	11,108199856,A,G	R2400G	T	0.239	Pos-Damg	0.083	D	-3.01
rs777481236	11,108172455,A,C	Y1753S	T	0.097	B	0.203	D	-3.68
rs777481236	11,108172455,A,G	Y1753C	T	0.097	Pro-Damg	0.01	D	-3.92
rs777648248	11,108216617,G,A	V2856I	Damaging	0.013	Pro-Damg	0.994	N	-0.56
rs777705500	11,108150274,A,G	K1114R	T	0.143	B	0.879	N	-1.53
rs777705500	11,108150274,A,T	K1114M	Damaging	0.013	B	0.999	D	-2.99
rs777755997	11,108119746,C,G	C384W	Damaging	0.006	B	0.973	D	-2.69
rs777812804	11,108165661,A,C	N1595T	T	0.105	Pro-Damg	0.002	N	-2.48
rs777812804	11,108165661,A,G	N1595S	T	0.21	B	0.005	N	-1.55
rs777986229	11,108121742,T,A	V517D	Damaging	0.001	Pro-Damg	0.857	D	-3.88
rs777986229	11,108121742,T,C	V517A	Damaging	0.005	Pro-Damg	0.457	N	-2.12
rs777986229	11,108121742,T,G	V517G	Damaging	0.001	B	0.857	D	-4.17
rs778123057	11,108155185,C,A	N1326K	T	0.371	Pro-Damg	0.002	N	-1.56
rs778123895	11,108137992,C,A	S854Y	T	0.078	B	0.001	N	-1.76
rs778123895	11,108137992,C,G	S854C	Damaging	0.047	Pro-Damg	0.911	N	-1.38
rs778201041	11,108098389,G,A	R13H	T	0.195	Pro-Damg	0.022	N	-1.53
rs778201041	11,108098389,G,T	R13L	T	0.152	B	0.768	N	-2.31
rs778233602	11,108143531,C,G	A1079G	T	0.108	B	0.434	N	-1.49
rs778267979	11,108236213,C,T	P3050L	Damaging	0.005	Pos-Damg	0.909	D	-4.03
rs778442248	11,108117694,C,G	A302G	T	0.084	B	0.007	N	-2.19
rs778442248	11,108117694,C,T	A302V	T	0.065	B	0.943	N	-2
rs778482902	11,108201003,A,C	E2457A	T	0.16	B	0.018	N	-2.26
rs778550056	11,108201062,G,A	G2477R	Damaging	0.003	B	1	D	-4.91
rs778601472	11,108205785,A,C	K2700N	Damaging	0	Pro-Damg	1	D	-4.31
rs778601472	11,108205785,A,G	K2700K	T	1			N	0
rs778601472	11,108205785,A,T	K2700N	Damaging	0	B	1	D	-4.31
rs778622948	11,108164046,G,A	D1540N	T	0.449	Pro-Damg	0.04	N	-0.75
rs778622948	11,108164046,G,T	D1540Y	Damaging	0.03	Pro-Damg	0.958	D	-4.15
rs778632065	11,108168079,A,G	I1659V	T	1	Pos-Damg	0	N	0.13
rs778670498	11,108236057,T,C	I2998T	T	1	Pos-Damg	0	N	0.06
rs778882461	11,108150289,C,A	A1119D	Damaging	0.003	Pro-Damg	0.964	D	-3.16
rs778882461	11,108150289,C,T	A1119V	T	0.152	Pro-Damg	0.61	N	-0.7
rs778888033	11,108199793,C,G	L2379V	Damaging	0.016	Pro-Damg	0.951	N	-0.42
rs778890679	11,108121679,G,A	S496N	T	0.084	B	0.041	N	-0.86
rs778890679	11,108121679,G,T	S496I	Damaging	0.004	Pro-Damg	0.977	D	-3.15
rs779004090	11,108124759,C,T	S706L	T	0.056	B	0.002	N	-1.85
rs779035681	11,108119769,G,T	G392V	Damaging	0.004	Pro-Damg	0.986	D	-3.97
rs779095853	11,108153563,C,T	P1235S	Damaging	0.012	Pos-Damg	1	D	-5.61
rs779145081	11,108206666,A,G	K2749R	Damaging	0	Pro-Damg	0.994	N	-2.19
rs779145081	11,108206666,A,T	K2749I	Damaging	0	Pos-Damg	1	D	-6.04
rs779148780	11,108153437,G,A	V1193I	T	0.088	B	0.445	N	-0.7
rs779156037	11,108175496,C,G	T1864R	T	0.472	Pro-Damg	0.074	N	-1.48
rs779156037	11,108175496,C,T	T1864I	T	0.172	B	0.032	N	-2.07
rs779297339	11,108098545,A,G	T39A	T	0.203	Pos-Damg	0.39	N	-0.88
rs779400418	11,108203525,A,G	I2609V	T	0.521	B	0.001	N	-0.39
rs779400418	11,108203525,A,T	I2609F	Damaging	0.007	Pos-Damg	0.52	N	-2.39
rs779611511	11,108192129,T,C	I2185T	T	0.056	B	0.023	N	-2.49
rs779611511	11,108192129,T,G	I2185S	T	0.168	Pos-Damg	0.008	D	-3.32
rs779718362	11,108164059,A,G	Y1544C	Damaging	0.001	B	0.989	D	-6.29
rs779720793	11,108173750,G,A	M1830I	T	0.531	B	0.004	N	0.46
rs779780896	11,108123566,G,C	E609Q	T	0.382	Pos-Damg	0.006	N	-0.18
rs779810877	11,108201132,T,C	V2500A	Damaging	0.003	B	0.994	D	-3.49
rs779946941	11,108151833,G,C	A1172P	Damaging	0.01	Pos-Damg	1	D	-2.94
rs779946941	11,108151833,G,T	A1172S	T	0.091	Pos-Damg	0.929	N	-1.47
rs780097986	11,108121562,G,A	R457Q	T	0.135	Pos-Damg	0.09	N	-0.99
rs780097986	11,108121562,G,T	R457L	Damaging	0.044	Pos-Damg	0.589	D	-2.74
rs780247224	11,108204614,A,T	K2643N	T	0.144	Pro-Damg	0.004	N	-1.55
rs780299607	11,108190744,C,G	D2137E	Damaging	0.01	Pos-Damg	0.973	N	-1.07
rs780303327	11,108224562,T,C	I2914T	Damaging	0.002	Pro-Damg	1	D	-3.81
rs780495319	11,108206589,A,G	R2723R	T	1			N	0
rs780495319	11,108206589,A,T	R2723S	Damaging	0	Pos-Damg	1	D	-5.18
rs780603110	11,108163479,C,A	L1524I	Damaging	0.041	B	0.089	N	-1.45
rs780603110	11,108163479,C,G	L1524V	T	0.115	Pro-Damg	0.295	N	-2.18
rs780603110	11,108163479,C,T	L1524F	Damaging	0.006	B	0.979	D	-3.44
rs780619951	11,108129749,C,G	R805G	Damaging	0.021	B	0.94	N	-1.93
rs780816003	11,108170565,G,T	W1710C	T	0.128	Pos-Damg	0.003	N	-1.14
rs780865776	11,108158334,A,G	H1334R	T	0.425	Pro-Damg	0.003	N	-0.8
rs780867575	11,108183149,T,C	F1977S	T	0.15	B	0.999	D	-2.79
rs780905851	11,108216616,T,A	S2855R	Damaging	0	Pro-Damg	1	D	-4.31
rs780905851	11,108216616,T,C	S2855S	T	1			N	0
rs780905851	11,108216616,T,G	S2855R	Damaging	0	Pro-Damg	1	D	-4.31
rs780931855	11,108201140,A,G	M2503V	Damaging	0.047	B	0.546	N	-1.42
rs780931855	11,108201140,A,T	M2503L	T	0.529	Pro-Damg	0.179	N	-0.23
rs780946471	11,108196047,C,T	H2195Y	T	0.665	B	0.005	N	-1.11
rs781023264	11,108115589,A,C	N246T	Damaging	0.006	Pos-Damg	0.997	N	-2.25
rs781023264	11,108115589,A,G	N246S	Damaging	0.014	B	0.95	N	-1.62
rs781275128	11,108164181,A,G	R1585G	T	0.506	Pro-Damg	0	N	-0.86
rs781357995	11,108155007,A,T	E1267V	T	0.065	Pro-Damg	0.363	D	-2.84
rs781404312	11,108098354,G,A	M1I	Damaging	0	Pro-Damg	0.872	N	-1.54
rs781448339	11,108180900,A,G	T1926A	Damaging	0.006	B	1	D	-2.89
rs781519408	11,108143301,G,C	M1040I	T	0.474	Pro-Damg	0.001	N	-0.37
rs781578507	11,108121573,G,A	E461K	T	0.108	B	0.015	N	-1.09
rs786201131	11,108119791,C,G	H399Q	T	0.218	B	0	N	-1.51
rs786201131	11,108119791,C,T	H399H	T	0.874			N	0
rs786201215	11,108168068,C,A	S1655Y	T	0.072	Pos-Damg	0.929	D	-2.93
rs786201297	11,108168057,G,A	L1651L	T	1			N	0
rs786201297	11,108168057,G,T	L1651F	Damaging	0	Pro-Damg	1	D	-3.42
rs786201469	11,108124568,A,G	E642E	T	1			N	0
rs786201469	11,108124568,A,T	E642D	T	0.203	Pro-Damg	0.016	N	-0.36
rs786201608	11,108114697,T,C	F172L	T	0.601	Pos-Damg	0	N	-0.62
rs786201670	11,108139262,G,C	D922H	Damaging	0.008	Pro-Damg	1	D	-2.54
rs786201807	11,108114715,C,G	P178A	Damaging	0.028	Pro-Damg	0.709	N	-2.1
rs786201807	11,108114715,C,T	P178S	T	0.152	Pro-Damg	0.305	N	-1.73
rs786201832	11,108159804,A,G	I1404V	T	0.253	Pro-Damg	0.017	N	-0.42
rs786201866	11,108127035,G,A	A740T	Damaging	0.03	Pro-Damg	0.999	N	-1.44
rs786201866	11,108127035,G,C	A740P	Damaging	0.012	B	1	N	-2.39
rs786201911	11,108218009,G,T	G2863V	Damaging	0	B	1	D	-7.76
rs786201956	11,108150288,G,T	A1119S	T	0.096	B	0.349	N	-1.46
rs786201969	11,108121675,A,G	I495V	T	0.425	Pro-Damg	0.003	N	-0.36
rs786202025	11,108202750,T,C	S2592P	Damaging	0.005	Pro-Damg	0.998	D	-2.7
rs786202067
rs786202089	11,108181041,A,C	R1973R	T	1			N	0
rs786202089	11,108181041,A,G	R1973G	Damaging	0.025	Pro-Damg	0.179	N	-2.24
rs786202094	11,108196240,C,G	S2259C	T	0.243	Pro-Damg	0.169	N	-0.86
rs786202096	11,108115580,T,C	L243S	T	0.066	Pro-Damg	0.008	N	-1.74
rs786202174	11,108202630,C,A	H2552N	Damaging	0	Pro-Damg	1	D	-6.1
rs786202195	11,108121739,T,C	L516S	Damaging	0.001	Pro-Damg	1	N	-2.09
rs786202219	11,108204633,G,A	D2650N	T	0.372	Pro-Damg	0.005	N	-0.78
rs786202223	11,108218014,A,G	I2865V	T	0.448	Pro-Damg	0.863	N	-0.46
rs786202233	11,108121673,G,A	G494D	Damaging	0.039	Pos-Damg	0.1	N	-1.43
rs786202233	11,108121673,G,T	G494V	T	0.207	Pro-Damg	0.02	N	-1.93
rs786202270	11,108128233,G,A	S759N	T	0.141	Pro-Damg	0.965	N	-0.61
rs786202372	11,108216485,T,C	S2812P	T	0.255	B	0.179	N	-2.24
rs786202372	11,108216485,T,G	S2812A	T	0.69	B	0.036	N	-1.32
rs786202399	11,108142118,T,G	V1021G	Damaging	0.001	Pro-Damg	0.999	D	-3.73
rs786202406	11,108159721,C,G	P1376R	Damaging	0	Pro-Damg	1	D	-5.37
rs786202469	11108122645,G,A
rs786202469	11,108122645,G,T	M563I	T	0.814	B	0	N	-0.4
rs786202470	11,108142120,A,G	I1022V	T	0.447	Pro-Damg	0	N	-0.43
rs786202470	11,108142120,A,T	I1022F	Damaging	0.012	Pos-Damg	0.001	N	-2.08
rs786202473	11,108164187,C,A	P1587T	T	0.377	Pro-Damg	0.716	N	-0.74
rs786202473	11,108164187,C,G	P1587A	T	0.396	B	0.001	N	-0.94
rs786202511	11,108124587,G,A	E649K	T	0.059	B	0.002	N	-1.87
rs786202583	11,108196186,A,C	N2241T	T	0.217	Pos-Damg	0.983	N	-2.02
rs786202583	11,108196186,A,G	N2241S	T	0.476	Pos-Damg	0.109	N	-1.16
rs786202605	11,108137950,A,G	D840G	T	0.115	B	0.001	D	-2.5
rs786202605	11,108137950,A,T	D840V	T	0.177	Pro-Damg	0.22	N	-1.37
rs786202644	11,108106542,A,G	I159M	Damaging	0.005	B	0.124	N	-0.73
rs786202673	11,108163471,T,C	V1521A	Damaging	0.002	Pos-Damg	0.515	D	-3.38
rs786202686	11,108119753,A,C	K387Q	Damaging	0.017	Pro-Damg	0.748	N	-1.14
rs786202686	11,108119753,A,G	K387E	Damaging	0.01	B	0.181	N	-1.58
rs786202728	11,108181016,G,C	K1964N	Damaging	0.02	B	0.1	N	-1.95
rs786202730	11,108198379,C,T	P2328L	T	0.111	B	0.684	N	-1.4
rs786202770	11,108122626,T,C	M557T	T	0.391	Pro-Damg	0.229	N	-0.72
rs786202770	11,108122626,T,G	M557R	Damaging	0.037	Pro-Damg	0	N	-1.67
rs786202781	11,108114691,G,T	V170L	T	1	Pro-Damg	0.005	N	0.1
rs786202826	11,108224532,A,G	E2904G	Damaging	0	Pos-Damg	0	D	-6.03
rs786202826	11,108224532,A,T	E2904V	Damaging	0	Pos-Damg	1	D	-6.03
rs786202856	11,108199947,A,G	H2430R	T	0.297	Pos-Damg	1	N	-2.07
rs786202859	11,108205711,G,A	E2676K	T	1	B	0.007	N	0.19
rs786202895	11,108137898,G,A	A823T	T	0.225	Pro-Damg	0.003	N	-0.98
rs786202895	11,108137898,G,T	A823S	T	0.333	B	0.049	N	-0.74
rs786202897	11,108153570,T,G	I1237S	T	0.988	B	0.005	N	0.39
rs786202928	11,108123554,C,G	H605D	Damaging	0.04	Pro-Damg	0.012	N	-1.79
rs786202928	11,108123554,C,T	H605Y	T	0.232	Pos-Damg	0.543	N	-1.71
rs786202953	11,108098508,A,T	E26D	T	0.069	B	0.003	N	-0.88
rs786202973	11,108164204,G,C	E1592D	T	0.055	B	0.698	N	-1.69
rs786202977	11,108138046,C,T	P872L	T	0.39	B	0.376	N	-1.5
rs786202978	11,108139195,C,G	D899E	T	0.42	Pro-Damg	0.001	N	-0.52
rs786202978	11,108139195,C,T	D899D	T	1	B	0.007	N	0
rs786203011	11,108100009,T,C	I97T	T	0.088	Pos-Damg	0.984	N	-1.1
rs786203013	11,108216572,G,C	D2841H	Damaging	0.003	Pro-Damg	1	D	-3.7
rs786203013	11,108216572,G,T	D2841Y	Damaging	0.002	Pro-Damg	1	D	-5.06
rs786203017	11,108165745,T,C	L1623P	T	0.204	Pro-Damg	0.002	N	0.24
rs786203048	11,108151734,G,A	E1139K	T	0.742	Pos-Damg	0	N	-0.76
rs786203048	11,108151734,G,C	E1139Q	T	0.527	B	0.001	N	-0.61
rs786203052	11,108196834,G,A	C2286Y	T	1	B	0	N	-1.34
rs786203054	11,108141801,T,A	L950H	Damaging	0.001	Pro-Damg	1	D	-4.19
rs786203054	11,108141801,T,G	L950R	Damaging	0.001	B	1	D	-3.68
rs786203055	11,108224589,T,A	V2923D	Damaging	0	Pro-Damg	1	D	-5.8
rs786203063	11,108098612,T,C	F61S	Damaging	0	Pro-Damg	1	D	-3.79
rs786203066	11,108153471,G,A	R1204K	T	0.669	Pro-Damg	0	N	-0.18
rs786203086	11,108175541,A,G	Q1879R	T	0.495	Pro-Damg	0.13	N	-1.1
rs786203094	11,108206654,C,T	T2745I	Damaging	0.002	Pos-Damg	1	D	-4.74
rs786203106	11:08139241,A,G
rs786203114	11,108154981,T,A	H1258Q	T	0.055	B	0.811	D	-3.87
rs786203175	11,108139223,A,T	T909S	T	0.423	Pro-Damg	0.076	N	-0.38
rs786203183	11,108236135,C,T	T3024I	T	0.358	B	0.412	N	-0.57
rs786203230	11,108122656,A,G	N567S	T	0.153	B	0.001	N	-0.86
rs786203254	11,108170592,T,A	N1719K	T	0.156	Pos-Damg	0.852	N	-2.31
rs786203254	11,108170592,T,C	N1719N	T	1			N	0
rs786203271	11,108224552,A,C	T2911P	Damaging	0.004	B	0.993	D	-4.42
rs786203271	11,108224552,A,G	T2911A	Damaging	0.008	B	0.909	D	-3.37
rs786203287	11,108155103,C,T	A1299V	T	0.076	B	0.473	N	-1.8
rs786203306	11,108155172,T,A	L1322H	Damaging	0.001	Pro-Damg	1	D	-4.06
rs786203306	11,108155172,T,C	L1322P	Damaging	0.001	Pro-Damg	0.999	D	-4.28
rs786203311	11,108199893,A,C	N2412T	Damaging	0.042	Pro-Damg	0.981	D	-2.57
rs786203311	11,108199893,A,G	N2412S	T	0.075	B	0.993	N	-1.61
rs786203321	11,108213998,C,A	T2773N	Damaging	0	B	1	D	-4.31
rs786203321	11,108213998,C,T	T2773I	Damaging	0	Pro-Damg	1	D	-5.17
rs786203332	11,108196222,A,C	K2253T	T	0.248	Pro-Damg	0.234	N	-1.22
rs786203332	11,108196222,A,G	K2253R	T	0.151	Pro-Damg	0.024	N	-1.01
rs786203341	11,108186840,G,A	Q2066Q	T	0.918			N	0
rs786203341	11,108186840,G,C	Q2066H	T	0.173	Pro-Damg	0.046	N	-1.3
rs786203352	11,108163365,G,C	V1486L	T	0.209	Pos-Damg	0.819	N	-1.48
rs786203352	11,108163365,G,T	V1486L	T	0.209	Pos-Damg	0.819	N	-1.48
rs786203369	11,108172464,C,G	T1756R	T	0.433	Pro-Damg	0.054	N	-0.34
rs786203394	11,108199965,G,A	R2436K	T	0.174	Pro-Damg	0.964	N	-0.9
rs786203404	11,108183190,G,A	E1991K	T	0.165	B	0.482	N	-2.12
rs786203410	11,108115633,A,T	T261S	T	0.549	B	0.012	N	-0.43
rs786203502	11,108115547,T,C	I232T	T	0.188	Pos-Damg	0.376	N	-1.22
rs786203502	11,108115547,T,G	I232S	Damaging	0.003	Pos-Damg	0.679	N	-1.7
rs786203505	11,108225584,C,G	L2945V	Damaging	0.006	B	0.999	N	-1.05
rs786203505	11,108225584,C,T	L2945L	T	1			N	0
rs786203520	11,108165691,C,T	A1605V	T	0.114	Pos-Damg	0.242	N	-1.86
rs786203542	11,108216627,C,G	S2859C	Damaging	0.004	B	0.997	D	-3.58
rs786203542	11,108216627,C,T	S2859F	Damaging	0.002	Pro-Damg	1	D	-4.37
rs786203572	11,108122596,C,T	T547I	Damaging	0.031	B	0.02	N	-2.42
rs786203595	11,108127055,C,G	F746L	Damaging	0.041	B	0.993	N	-2.47
rs786203595	11,108127055,C,T	F746F	T	1			N	0
rs786203602	11,108119735,A,G	S381G	T	0.619	Pro-Damg	0	N	-0.49
rs786203606	11,108098353,T,C	M1T	Damaging	0	B	0.872	N	-1.87
rs786203618	11,108154992,G,A	R1262K	T	0.639	B	0.85	N	-0.62
rs786203618	11,108154992,G,T	R1262I	Damaging	0.046	Pro-Damg	0.873	N	-2.31
rs786203621	11,108204646,C,T	T2654I	T	0.575	B	0.001	N	-0.74
rs786203651	11,108202639,C,A	H2555N	Damaging	0	Pos-Damg	1	D	-6.1
rs786203651	11,108202639,C,T	H2555Y	Damaging	0	B	1	D	-5.18
rs786203654	11,108124548,C,T	H636Y	T	1	B	0.861	N	-1.12
rs786203667	11,108121434,G,A	Q414Q	T	1			N	0
rs786203667	11,108121434,G,T	Q414H	Damaging	0.002	B	1	D	-3.04
rs786203668	11,108180936,T,A	Y1938N	Damaging	0	Pro-Damg	1	D	-8.44
rs786203697	11,108199815,C,A	A2386E	Damaging	0	B	1	D	-3.28
rs786203697	11,108199815,C,G	A2386G	Damaging	0	B	1	D	-3.11
rs786203721	11,108235896,C,A	L2980I	T	0.056	Pro-Damg	0.148	N	-0.84
rs786203721	11,108235896,C,G	L2980V	Damaging	0.033	Pro-Damg	0.013	N	-1.18
rs786203761	11,108159790,C,A	T1399N	T	0.089	Pos-Damg	0.704	N	-1.34
rs786203761	11,108159790,C,G	T1399S	T	0.68	Pos-Damg	0.004	N	-0.3
rs786203764	11,108202248,G,A	M2531I	T	0.143	B	0.126	N	-0.86
rs786203764	11,108202248,G,T	M2531I	T	0.143	B	0.126	N	-0.86
rs786203765	11,108183157,G,A	G1980R	T	0.426	B	0.011	N	-1.41
rs786203767	11,108186787,T,G	Y2049D	Damaging	0	B	1	D	-6.96
rs786203783	11,108123585,T,C	L615P	Damaging	0	B	0.976	D	-3.85
rs786203785	11,108163360,T,C	M1484T	T	0.466	B	0	N	0.42
rs786203789	11,108163408,A,G	Q1500R	T	0.431	B	0	N	0.04
rs786203815	11,108119819,C,A	L409I	T	0.468	Pro-Damg	0.002	N	0.01
rs786203815	11,108119819,C,T	L409F	Damaging	0.018	Pro-Damg	0.679	N	-1.45
rs786203851	11,108106459,T,C	S132P	T	0.221	Pro-Damg	0.658	N	-1.46
rs786203855	11,108119733,A,G	Y380C	T	0.173	B	0.507	N	-2.35
rs786203857	11,108165757,A,T	Q1627L	Damaging	0.005	Pro-Damg	0.999	D	-4.18
rs786203910	11,108170597,C,T	T1721I	T	0.177	B	0.554	N	-0.52
rs786203917	11,108225560,G,A	V2937M	Damaging	0.006	Pro-Damg	1	N	-1.92
rs786203953	11,108164144,G,C	K1572N	Damaging	0.027	Pro-Damg	0.947	D	-2.6
rs786203975	11,108213979,C,T	L2767F	Damaging	0.008	Pro-Damg	1	D	-3.18
rs786204124	11,108121550,C,T	P453L	T	0.198	Pro-Damg	0.037	N	-1.32
rs786204141	11,108186749,A,G	Y2036C	Damaging	0.001	B	1	D	-8.29
rs786204173	11,108188134,C,T	S2078F	Damaging	0.004	B	0.998	D	-3.85
rs786204177	11,108106474,T,G	Y137D	Damaging	0.001	B	0.89	D	-4.46
rs786204217	11,108143261,A,C	H1027P	T	0.243	Pos-Damg	0.13	N	-2.44
rs786204217	11,108143261,A,G	H1027R	T	0.584	B	0	N	-1.25
rs786204218	11,108236114,T,C	L3017P	Damaging	0	Pro-Damg	1	D	-6.16
rs786204219	11,108114731,A,C	H183P	Damaging	0.009	Pos-Damg	0.058	N	-1.61
rs794728018	11,108224553,C,T	T2911I	Damaging	0.002	B	0.993	D	-4.61
rs797045319	11,108124632,A,G	T664A	T	0.072	B	0.003	N	-0.93
rs863224440	11,108203626,A,C	R2642S	Damaging	0.027	B	0.925	N	-1.22
rs863224462	11,108199898,C,A	Q2414K	T	0.277	B	0.716	N	-0.99
rs863224463	11,108204670,T,A	V2662D	Damaging	0.001	B	1	D	-5.51
rs863224555	11,108119822,G,A	V410M	Damaging	0.043	B	0.098	N	-0.73
rs863224556	11,108121441,A,G	T417A	T	0.347	B	0.002	N	-1.16
rs863224557	11,108123611,A,G	M624V	T	0.087	B	0.073	N	-1.05
rs863224558	11,108139197,T,C	M900T	T	0.315	Pos-Damg	0.003	N	-1.1
rs863224559	11,108139199,C,T	L901F	Damaging	0.016	Pro-Damg	0.79	N	-1.73
rs863224560	11,108142111,C,G	L1019V	Damaging	0.011	B	1	N	-1.22
rs863224561	11,108143269,A,G	K1030E	Damaging	0.045	Pos-Damg	0.025	N	-0.82
rs863224562	11,108151776,G,C	V1153L	T	0.27	Pro-Damg	0.025	N	-0.85
rs863224563	11,108153525,T,C	L1222P	Damaging	0.001	B	1	D	-3.46
rs863224564	11,108155009,G,A	V1268M	Damaging	0	B	1	N	-1.71
rs863224565	11,108155050,T,G	S1281R	T	0.357	Pro-Damg	0.001	N	-1.17
rs863224566	11,108155200,G,A	Q1331Q	T	1			N	0
rs863224566	11,108155200,G,C	Q1331H	Damaging	0.01	B	0.997	D	-2.56
rs863224568	11,108158336,T,G	L1335V	T	0.225	B	0.023	N	-1.54
rs863224569	11,108158350,T,G	N1339K	Damaging	0.012	Pro-Damg	0.973	D	-2.81
rs863224570	11,108158416,G,A	Q1361Q	T	1			N	0
rs863224570	11,108158416,G,T	Q1361H	T	0.106	B	0	N	-0.57
rs863224571	11,108159720,C,G	P1376A	Damaging	0	B	0.962	D	-4.79
rs863224572	11,108163351,C,T	S1481F	Damaging	0.045	Pro-Damg	0.514	N	-2.14
rs863224573	11,108114680,A,G	E166G	Damaging	0.017	Pro-Damg	0.201	D	-2.79
rs863224573	11,108114680,A,T	E166V	Damaging	0.004	Pro-Damg	0.553	D	-3.48
rs863224574	11,108170504,A,G	H1690R	T	0.1	Pro-Damg	0.036	D	-3.05
rs863224575	11,108186629,C,T	P2029L	T	0.282	Pro-Damg	0.714	D	-3.39
rs863224576	11,108186760,G,A	A2040T	T	0.058	B	0.937	N	-1.58
rs863224576	11,108186760,G,C	A2040P	T	0.055	B	0.991	N	-2.29
rs863224577	11,108188168,A,C	K2089N	T	0.481	Pro-Damg	0.062	N	-0.62
rs863224578	11,108196221,A,C	K2253Q	T	0.084	Pos-Damg	0.922	N	-1
rs863224579	11,108196822,A,G	N2282S	Damaging	0.041	Pos-Damg	0.357	N	-2.05
rs863224580	11,108115606,T,A	C252S	T	0.053	Pro-Damg	0.689	D	-6.17
rs863224580	11,108115606,T,G	C252G	Damaging	0.014	B	0.996	D	-7.43
rs863224581	11,108115630,C,A	P260T	T	1	B	0.978	N	-1.57
rs863224581	11,108115630,C,G	P260A	T	0.366	B	0.928	N	-2
rs863224582	11,108235917,G,C	D2987H	Damaging	0.003	B	0.814	D	-2.8
rs863224582	11,108235917,G,T	D2987Y	Damaging	0.002	B	0.34	D	-3.39
rs863224583	11,108098523,G,A	K31K	T	1			N	0
rs863224583	11,108098523,G,C	K31N	Damaging	0.006	Pro-Damg	0.565	N	-1.67
rs864622125	11,108172497,T,G	F1767C	Damaging	0.001	B	1	D	-6.4
rs864622131	11,108137972,G,A	M847I	T	0.117	B	0.002	N	-1.37
rs864622137	11,108155141,A,G	R1312G	Damaging	0.002	Pro-Damg	0.983	D	-3.74
rs864622148	11,108181011,G,A	D1963N	T	0.21	Pro-Damg	0.966	N	-2.22
rs864622159	11,108142010,A,G	D985G	Damaging	0.012	B	0.376	D	-3.12
rs864622159	11,108142010,A,T	D985V	Damaging	0.007	Pos-Damg	0.679	D	-3.34
rs864622163	11,108115637,T,C	L262S	Damaging	0.002	Pro-Damg	0.901	D	-2.6
rs864622163	11,108115637,T,G	L262W	Damaging	0.001	Pro-Damg	0.991	D	-3.01
rs864622173	11,108218081,A,C	H2887P	Damaging	0	Pos-Damg	1	D	-8.62
rs864622173	11,108218081,A,G	H2887R	Damaging	0	Pro-Damg	1	D	-6.9
rs864622251	11,108186757,G,A	E2039K	Damaging	0.006	B	1	D	-2.53
rs864622259	11,108126942,A,G	I709V	T	0.758	Pos-Damg	0	N	0.13
rs864622259	11,108126942,A,T	I709F	T	0.284	B	0.055	N	-1.45
rs864622262	11,108121771,T,C	F527L	T	0.398	Pos-Damg	0.051	N	-2.07
rs864622285	11,108122605,T,G	I550R	T	0.176	B	0.055	N	-1
rs864622294	11,108126964,T,A	V716D	Damaging	0.003	Pos-Damg	0.943	D	-2.87
rs864622294	11,108126964,T,C	V716A	Damaging	0.009	B	0.7	N	-1.45
rs864622294	11,108126964,T,G	V716G	T	0.117	Pos-Damg	0.943	D	-2.67
rs864622368	11,108202634,C,A	P2553H	Damaging	0	B	1	D	-7.79
rs864622368	11,108202634,C,G	P2553R	Damaging	0	B	1	D	-7.78
rs864622368	11,108202634,C,T	P2553L	Damaging	0	B	1	D	-8.61
rs864622412	11,108129799,T,G	S821R	T	0.509	Pro-Damg	0.25	N	-0.45
rs864622462	11,108165697,C,G	P1607R	Damaging	0.029	B	0.923	D	-2.82
rs864622462	11,108165697,C,T	P1607L	T	0.071	Pro-Damg	0.047	D	-2.99
rs864622471	11,108199927,A,T	E2423D	T	0.085	B	0.964	N	-1.25
rs864622508	11,108100038,T,C	C107R	T	0.116	Pos-Damg	0.002	N	-2.4
rs864622515	11,108099940,G,A	C74Y	T	1	Pro-Damg	0	N	-1.39
rs864622548	11,108119816,G,A	D408N	T	0.133	Pro-Damg	0.969	N	-1.21
rs864622563	11,108199949,A,G	K2431E	T	0.151	B	0.063	N	-1.69
rs864622587	11,108143262,T,A	H1027Q	T	0.47	Pos-Damg	0.003	N	-0.9
rs864622587	11,108143262,T,C	H1027H	T	0.857			N	0
rs864622605	11,108115706,T,C	L285P	Damaging	0.002	Pro-Damg	1	D	-3.77
rs864622605	11,108115706,T,G	L285R	Damaging	0.001	B	1	D	-3.3
rs864622606	11,108139313,A,G	T939A	T	0.243	B	0	N	-1.44
rs864622650	11,108119741,C,T	P383S	T	0.156	Pro-Damg	0.001	D	-3.04
rs864622654	11,108155093,C,G	P1296A	Damaging	0	Pro-Damg	1	D	-4.63
rs864622654	11,108155093,C,T	P1296S	Damaging	0	B	1	D	-4.23
rs864622688	11,108202253,G,A	G2533E	T	0.166	Pos-Damg	0.319	N	-1.01
rs864622742	11,108106548,G,A	Q161Q	T	1			N	0
rs864622742	11,108106548,G,C	Q161H	T	0.221	Pro-Damg	0.082	N	-0.88
rs864622758	11,108099999,A,G	M94V	T	0.104	B	0.515	N	-1.07
rs866290641	11,108186830,G,A	G2063E	Damaging	0.004	Pro-Damg	0.998	D	-3.82
rs866290641	11,108186830,G,C	G2063A	Damaging	0.006	B	0.987	D	-3.45
rs866290641	11,108186830,G,T	G2063V	Damaging	0.001	Pro-Damg	0.998	D	-5.23
rs866402530	11,108206638,C,A	Q2740K	T	0.209	Pro-Damg	0.619	N	-0.78
rs866521873	11,108121432,C,A	Q414K	Damaging	0.016	Pro-Damg	0.966	N	-2.3
rs866740291	11,108198439,C,A	T2348K	Damaging	0.002	B	1	D	-4.67
rs866740291	11,108198439,C,T	T2348M	Damaging	0.001	B	1	D	-4.87
rs866769874	11,108236167,C,A	L3035I	Damaging	0	B	1	N	-1.66
rs866769874	11,108236167,C,T	L3035F	Damaging	0	B	1	D	-3.51
rs866824608	11,108183191,A,G	E1991G	Damaging	0.049	B	0.984	D	-4.04
rs867360777	11,108151815,C,T	P1166S	Damaging	0.043	Pro-Damg	0.998	D	-2.71
rs867760244	11,108188228,G,T	W2109C	Damaging	0	Pro-Damg	1	D	-12.37
rs867893961	11,108236192,A,G	K3043R	T	0.064	Pos-Damg	0.847	N	-1.23
rs868748140	11,108099987,A,G	R90G	Damaging	0.008	B	0.916	N	-1.94
rs876658149	11,108129716,A,C	S794R	Damaging	0.012	Pro-Damg	0.059	N	-1.32
rs876658159	11,108106532,G,C	W156S	Damaging	0	Pro-Damg	1	D	-6.02
rs876658161	11,108098400,C,A	H17N	T	0.553	B	0	N	0.44
rs876658175	11,108172439,A,C	S1748R	T	0.491	Pos-Damg	0.001	N	-0.46
rs876658180	11,108121726,A,G	I512V	T	0.454	Pro-Damg	0.06	N	-0.42
rs876658208	11,108203546,A,G	M2616V	Damaging	0.015	Pro-Damg	0.179	N	-0.96
rs876658236	11,108218087,A,G	D2889G	Damaging	0	Pos-Damg	1	D	-6.03
rs876658239	11,108159769,A,G	Y1392C	Damaging	0.004	B	1	D	-5.8
rs876658242	11,108235895,G,A	E2979E	T	1			N	0
rs876658242	11,108235895,G,T	E2979D	T	0.604	B	0	N	-0.31
rs876658263	11,108106456,T,C	S131P	T	0.464	B	0.001	N	-0.01
rs876658300	11,108188233,A,G	H2111R	T	0.346	B	0.032	N	-0.96
rs876658322	11,108117720,A,G	I311V	T	0.426	Pro-Damg	0.176	N	-0.15
rs876658324	11,108106403,C,T	P113L	Damaging	0	B	1	D	-4.42
rs876658363	11,108150265,T,C	L1111P	Damaging	0.006	Pos-Damg	0.997	D	-2.66
rs876658373	11,108139188,T,C	F897S	T	0.301	Pos-Damg	0	N	-1.2
rs876658385	11,108205757,G,A	R2691H	T	0.222	B	0.039	N	-0.87
rs876658385	11,108205757,G,C	R2691P	Damaging	0.012	Pro-Damg	0.992	D	-2.55
rs876658415	11,108186599,A,G	Y2019C	Damaging	0	B	1	D	-5.47
rs876658435	11,108196066,T,C	V2201A	T	0.117	B	0.01	D	-2.75
rs876658454	11,108196900,C,T	A2308V	Damaging	0.005	Pro-Damg	1	D	-3.66
rs876658463	11,108150318,G,A	E1129K	Damaging	0.01	B	0.992	N	-1.79
rs876658491	11,108150224,C,G	F1097L	Damaging	0.009	B	0.997	D	-3.94
rs876658496	11,108202270,G,A	E2539K	T	0.333	Pro-Damg	0.102	N	-1.18
rs876658507	11,108198424,A,G	N2343S	T	0.482	Pro-Damg	0.007	N	-1.76
rs876658517	11,108198462,A,G	I2356V	Damaging	0	Pro-Damg	1	N	-0.62
rs876658517	11,108198462,A,T	I2356F	Damaging	0	Pos-Damg	1	D	-3.69
rs876658519	11,108224594,G,A	G2925S	Damaging	0	Pro-Damg	1	D	-5.17
rs876658519	11,108224594,G,C	G2925R	Damaging	0	B	1	D	-6.9
rs876658520	11,108098519,T,A	F30Y	Damaging	0.02	Pro-Damg	0.999	N	-0.97
rs876658520	11,108098519,T,G	F30C	Damaging	0.003	B	1	N	-2.42
rs876658529	11,108236153,G,A	G3030E	Damaging	0	Pos-Damg	1	D	-6.19
rs876658529	11,108236153,G,T	G3030V	Damaging	0	Pos-Damg	1	D	-7.15
rs876658542	11,108190718,T,C	Y2129H	T	0.066	B	0.957	D	-3.81
rs876658542	11,108190718,T,G	Y2129D	Damaging	0.004	B	1	D	-7.74
rs876658559	11,108206668,T,A	L2750I	Damaging	0	B	1	N	-1.73
rs876658559	11,108206668,T,C	L2750L	T	1			N	0
rs876658563	11,108198406,G,A	C2337Y	Damaging	0.002	B	0.999	D	-3.56
rs876658567	11,108119773,G,C	W393C	Damaging	0	B	1	D	-5.51
rs876658607	11,108196205,T,G	I2247M	Damaging	0.048	Pos-Damg	0.675	N	-1.11
rs876658628	11,108141846,A,T	D965V	Damaging	0.005	B	0.679	D	-2.99
rs876658647	11,108121774,A,G	T528A	T	0.371	Pos-Damg	0.004	N	-0.47
rs876658669	11,108155199,A,G	Q1331R	Damaging	0.023	Pro-Damg	0.965	N	-1.62
rs876658688	11,108129772,G,A	M812I	T	0.44	Pro-Damg	0.002	N	-0.31
rs876658711	11,108163377,A,G	S1490G	T	0.101	Pos-Damg	0.618	N	-2.11
rs876658715	11,108199948,T,A	H2430Q	T	0.171	B	0.163	N	-2.36
rs876658715	11,108199948,T,C	H2430H	T	0.436			N	0
rs876658715	11,108199948,T,G	H2430Q	T	0.171	B	0.163	N	-2.36
rs876658716	11,108216600,T,C	L2850S	Damaging	0	B	1	D	-4.71
rs876658753	11,108115571,T,G	L240R	Damaging	0.021	B	0.991	N	-1.88
rs876658767	11,108236080,G,A	A3006T	Damaging	0.005	Pro-Damg	1	D	-3.34
rs876658767	11,108236080,G,C	A3006P	Damaging	0.007	Pro-Damg	1	D	-4.2
rs876658772	11,108121556,T,C	V455A	Damaging	0.003	B	0.996	N	-1.9
rs876658804	11,108137928,G,A	G833R	T	0.193	Pos-Damg	0.008	N	-1.05
rs876658823	11,108224582,A,T	T2921S	Damaging	0.02	Pos-Damg	0.961	N	-0.75
rs876658831	11,108180895,C,T	S1924L	T	0.322	B	0	N	-1.99
rs876658833	11,108119786,G,A	D398N	Damaging	0.009	B	0.958	N	-2.09
rs876658870	11,108160381,A,G	N1430S	T	0.079	B	0.105	N	-1.59
rs876658886	11,108200965,G,C	E2444D	Damaging	0.032	Pos-Damg	0.999	N	-2.18
rs876658890	11,108173628,G,A	D1790N	T	0.411	Pro-Damg	0.411	N	-0.48
rs876658893	11,108099934,C,G	T72R	Damaging	0.029	B	0.047	N	-1.51
rs876658893	11,108099934,C,T	T72I	T	0.815	Pro-Damg	0.001	N	-0.32
rs876658907	11,108175436,A,G	Y1844C	Damaging	0.002	B	1	D	-4.27
rs876658913	11,108137988,T,C	S853P	T	0.107	B	0.682	N	-1.6
rs876658925	11,108202640,A,G	H2555R	Damaging	0	Pro-Damg	1	D	-7.01
rs876658933	11,108202277,T,G	L2541R	Damaging	0	Pro-Damg	1	D	-5.04
rs876658958	11,108216566,T,A	F2839I	Damaging	0.003	B	1	D	-4.64
rs876658963	11,108150267,C,G	P1112A	T	0.094	Pro-Damg	0.991	D	-2.58
rs876658963	11,108150267,C,T	P1112S	T	0.098	B	0.997	N	-2.11
rs876658966	11,108196228,T,G	L2255R	Damaging	0	Pro-Damg	1	D	-4
rs876658989	11,108180991,T,A	L1956H	Damaging	0	Pro-Damg	1	D	-6.59
rs876659066	11,108206581,G,C	D2721H	Damaging	0	Pos-Damg	1	D	-6.04
rs876659069	11,108164127,G,A	D1567N	T	0.072	Pro-Damg	0.257	N	-1.46
rs876659078	11,108098587,A,C	K53Q	Damaging	0.024	Pos-Damg	0.987	N	-1.11
rs876659083	11,108199833,G,A	R2392Q	Damaging	0.008	B	1	D	-3.06
rs876659083	11,108199833,G,T	R2392L	Damaging	0.008	Pro-Damg	1	D	-5.84
rs876659084	11,108128274,A,C	I773L	T	0.163	B	0.004	N	-0.63
rs876659092	11,108117840,G,A	D351N	Damaging	0	Pos-Damg	0.999	N	-2.33
rs876659092	11,108117840,G,C	D351H	Damaging	0	Pro-Damg	0.99	D	-3.26
rs876659101	11,108196114,T,A	F2217Y	T	0.09	B	0.984	N	-2.22
rs876659150	11,108172460,A,G	M1755V	T	0.286	Pro-Damg	0	N	-0.79
rs876659183	11,108196942,G,T	S2322I	T	0.097	B	0.009	N	-1.3
rs876659199	11,108117740,T,G	D317E	T	0.178	Pro-Damg	0.998	N	-0.97
rs876659217	11,108143333,A,C	E1051A	Damaging	0.013	B	0.963	D	-2.68
rs876659217	11,108143333,A,G	E1051G	Damaging	0.005	B	0.989	D	-3.38
rs876659240	11,108121613,G,A	S474N	T	0.331	B	0	N	-0.44
rs876659240	11,108121613,G,T	S474I	T	0.261	B	0.003	N	-1.4
rs876659275	11,108119712,C,G	T373R	Damaging	0.003	Pro-Damg	0.189	N	-2.09
rs876659283	11,108122724,G,C	E590Q	T	0.058	Pro-Damg	0.981	N	-0.86
rs876659283	11,108122724,G,T	Not found	Not found	Not found	Not found	Not found	Not found	Not found
rs876659292	11,108160333,C,A	S1414Y	Damaging	0.002	Pro-Damg	1	D	-3.76
rs876659292	11,108160333,C,G	S1414C	Damaging	0.001	B	1	D	-3.2
rs876659323	11,108202232,G,A	R2526K	Damaging	0	Pos-Damg	1	N	-2.26
rs876659323	11,108202232,G,C	R2526T	Damaging	0	B	1	D	-4.51
rs876659324	11,108098534,G,A	R35Q	T	0.232	B	0.011	N	-0.85
rs876659325	11,108188204,A,C	Q2101H	Damaging	0.002	Pro-Damg	1	D	-3.33
rs876659325	11,108188204,A,G	Q2101Q	T	1	Not found	Not found	N	0
rs876659351	11,108205823,G,A	R2713K	T	0.104	Pro-Damg	0.972	N	-1.52
rs876659351	11,108205823,G,C	R2713T	Damaging	0.004	Pro-Damg	1	D	-3.04
rs876659365	11,108201041,T,G	Y2470D	Damaging	0	Pro-Damg	1	D	-9.36
rs876659370	11,108160520,C,G	I1476M	T	0.189	Pro-Damg	0.314	N	-1.54
rs876659392	11,108199814,G,C	A2386P	Damaging	0	Pro-Damg	1	D	-3.61
rs876659392	11,108199814,G,T	A2386S	Damaging	0	B	1	N	-1.68
rs876659401	11,108128241,C,G	L762V	T	0.318	Pos-Damg	0.025	N	-0.5
rs876659401	11,108128241,C,T	L762L	T	0.36	Not found	Not found	N	0
rs876659407	11,108098614,A,G	R62G	Damaging	0.008	Pro-Damg	0.907	N	-1.97
rs876659412	11,108141830,C,A	P960T	T	0.356	Pro-Damg	0.124	N	-1.75
rs876659412	11,108141830,C,T	P960S	T	0.561	Pro-Damg	0	N	-1.29
rs876659425	11,108122658,A,G	R568G	T	0.218	Pro-Damg	0	N	-1.07
rs876659429	11,108198414,G,A	V2340I	T	0.515	Pos-Damg	0.002	N	0.24
rs876659429	11,108198414,G,T	V2340F	Damaging	0.015	Pro-Damg	0.824	D	-2.6
rs876659454	11,108186625,C,A	Q2028K	T	0.17	Pro-Damg	0.339	N	-1.52
rs876659454	11,108186625,C,G	Q2028E	T	0.323	Pro-Damg	0.543	N	0.05
rs876659454	11,108186625,C,T	Not found	Not found	Not found	Not found	Not found	Not found	Not found
rs876659486	11,108138000,C,G	L857V	Damaging	0.02	Pro-Damg	0.993	N	-1.14
rs876659487	11,108178686,G,A	V1913M	Damaging	0.005	Pro-Damg	0.974	N	-2.16
rs876659487	11,108178686,G,C	V1913L	T	0.08	B	0.065	N	-1.87
rs876659494	11,108115541,A,C	N230T	T	0.066	Pos-Damg	0.124	N	-1.07
rs876659494	11,108115541,A,G	N230S	T	0.587	Pro-Damg	0.001	N	-0.47
rs876659505	11,108216575,C,T	P2842S	Damaging	0	Pro-Damg	1	D	-6.03
rs876659516	11,108225594,T,C	I2948T	Damaging	0.002	Pro-Damg	1	D	-3.64
rs876659531	11,108115639,C,T	L263F	Damaging	0	Pro-Damg	1	N	-2.27
rs876659555	11,108186745,A,G	T2035A	Damaging	0.008	B	0.994	D	-2.79
rs876659556	11,108200954,G,T	V2441F	Damaging	0.006	Pos-Damg	0.999	N	-2.28
rs876659557	11,108202741,A,G	K2589E	T	0.068	Pos-Damg	0.968	N	-1.24
rs876659558	11,108186758,A,G	E2039G	Damaging	0.004	Pro-Damg	0.999	D	-4.91
rs876659558	11,108186758,A,T	E2039V	Damaging	0.003	B	0.996	D	-3.98
rs876659559	11,108160389,T,G	Y1433D	Damaging	0.005	Pro-Damg	0.983	D	-5.26
rs876659561	11,108202744,C,G	Q2590E	T	0.682	Pos-Damg	0	N	-0.32
rs876659561	11,108202744,C,T	Not found	Not found	Not found	Not found	Not found	Not found	Not found
rs876659567	11,108117804,A,G	I339V	T	0.542	Pos-Damg	0.001	N	-0.13
rs876659570	11,108119756,A,G	K388E	Damaging	0.011	B	0.1	N	-1.69
rs876659605	11,108153562,T,A	F1234L	T	0.209	Pos-Damg	0.929	D	-3.98
rs876659605	11,108153562,T,G	F1234L	T	0.209	Pro-Damg	0.929	D	-3.98
rs876659619	11,108206614,T,C	F2732L	Damaging	0	Pro-Damg	1	D	-5.18
rs876659619	11,108206614,T,G	F2732V	Damaging	0	Pos-Damg	1	D	-6.04
rs876659633	11,108151729,G,A	S1137N	T	0.593	B	0.001	N	0.01
rs876659667	11,108143572,A,G	I1093V	T	0.93	Pos-Damg	0	N	-0.19
[truncated: 2,651 more rows]
