# Supplementary material for: Pathogenic Genetic Variants From Highly Connected Cancer Susceptibility Genes Confer the Loss of Structural Stability
Source: Research Square preprint supplement (doi:10.21203/rs.3.rs-480522/v1), 2021-05-05
Supplement: Supplementary file 2 [file a5d36f5e90777d3518576095.xlsx]

## Sheet: Sheet1
Here, D=Deleterious, N=Neutral
RS ID	Chromosome loci	Mutation position	PhD-SNP	PANTHER	SNPs&GO	SNAP2	PredictSNP
rs11540652	17,7577538,C,A	R248L	D	D	D	N	D
rs11540652	17,7577538,C,G	R248P	D	D	D	N	D
rs11540652	17,7577538,C,T	R248Q	D	D	D	N	D
rs11540654	17,7579358,C,A	R110L	D	Not found	N	N	D
rs11540654	17,7579358,C,G	R110P	D	Not found	N	N	D
rs17849781	17,7577106,G,A	P278S	D	D	D	N	D
rs17849781	17,7577106,G,C	P278A	D	D	D	N	D
rs17849781	17,7577106,G,T	P278T	D	D	D	N	D
rs17881470	17,7573931,A,G	S366P	N	N	N	N	N
rs17882252	17,7574012,C,G	E339Q	D	N	N	N	D
rs17882252	17,7574012,C,T	E339K	D	D	D	N	D
rs28934571	17,7577534,C,A	R249S	D	D	D	N	D
rs28934571	17,7577534,C,G	R249S	D	D	D	N	D
rs28934573	17,7577559,G,A	S241F	D	D	D	N	D
rs28934573	17,7577559,G,C	S241C	D	D	D	N	D
rs28934573	17,7577559,G,T	S241Y	D	D	D	N	D
rs28934574	17,7577094,G,A	R282W	D	D	D	N	D
rs28934574	17,7577094,G,C	R282G	D	D	D	N	D
rs28934575	17,7577548,C,A	G245C	D	D	D	N	D
rs28934575	17,7577548,C,G	G245R	D	D	D	N	D
rs28934575	17,7577548,C,T	G245S	D	D	D	N	D
rs28934576	17,7577120,C,A	R273L	Not found	Not found	Not found	N	D
rs28934576	17,7577120,C,G	R273P	Not found	Not found	Not found	N	D
rs28934576	17,7577120,C,T	R273H	Not found	Not found	Not found	N	D
rs28934577	17,7577511,A,C	L257R	D	D	D	N	D
rs28934577	17,7577511,A,G	L257P	D	D	D	N	D
rs28934577	17,7577511,A,T	L257Q	D	D	D	N	D
rs28934578	17,7578406,C,A	R175L	D	D	D	N	D
rs28934578	17,7578406,C,T	R175H	D	D	D	N	D
rs28934873	17,7578532,A,G	M133T	Not found	Not found	Not found	Not found	Not found
rs28934874	17,7578479,G,A	P151S	D	D	D	N	D
rs28934874	17,7578479,G,C	P151A	D	D	D	N	D
rs28934874	17,7578479,G,T	P151T	D	D	D	N	D
rs28934875	17,7578518,C,G	A138P	D	D	D	N	D
rs55832599	17,7577139,G,A	R267W	D	D	D	N	D
rs72661119	17,7577151,T,C	N263D	N	N	N	N	N
rs112431538	17,7577085,C,T	E285K	D	D	N	N	D
rs121912651	17,7577539,G,A	R248W	D	D	D	N	D
rs121912651	17,7577539,G,C	R248G	D	D	D	N	D
rs121912652	17,7577509,C,T	E258K	D	D	D	N	D
rs121912653	17,7577526,A,G	L252P	D	D	D	N	D
rs121912654	17,7578461,C,A	V157F	D	D	N	N	D
rs121912655	17,7577556,C,A	C242F	D	D	D	N	D
rs121912655	17,7577556,C,G	C242S	D	D	D	N	D
rs121912655	17,7577556,C,T	C242Y	D	D	D	N	D
rs121912656	17,7577547,C,A	G245V	D	D	D	N	D
rs121912656	17,7577547,C,G	G245A	D	D	D	N	D
rs121912656	17,7577547,C,T	G245D	D	D	D	N	D
rs121912657	17,7577124,C,A	V272L	D	N	N	N	D
rs121912657	17,7577124,C,G	V272L	D	N	N	N	D
rs121912657	17,7577124,C,T	V272M	D	D	N	N	D
rs121912658	17,7579329,T,C	K120E	D	D	D	N	D
rs121912658	17,7579329,T,G	K120Q	D	D	D	N	D
rs121912659	17,7576872,C,A	G325V	D	D	D	N	D
rs121912660	17,7577099,C,A	R280I	D	D	D	N	D
rs121912660	17,7577099,C,T	R280K	D	D	D	N	D
rs121912660	17,7577099,C,G	R280T	D	D	D	N	D
rs121912662	17,7573996,A,G	L344P	D	D	D	N	D
rs121912663	17,7577063,T,A	K292I	N	D	N	N	D
rs121912664	17,7574017,C,A	R337L	D	N	N	N	D
rs121912664	17,7574017,C,G	R337P	D	D	N	N	N
rs121912664	17,7574017,C,T	R337H	N	D	N	N	D
rs121912666	17,7578190,T,C	Y220C	D	D	D	N	D
rs121912666	17,7578190,T,G	Y220S	D	D	D	N	D
rs121912667	17,7577084,T,A	E285V	N	D	N	N	D
rs121913343	17,7577121,G,A	R273C	Not found	Not found	Not found	Not found	Not found
rs121913343	17,7577121,G,C	R273G	Not found	Not found	Not found	Not found	Not found
rs121913343	17,7577121,G,T	R273S	Not found	Not found	Not found	Not found	Not found
rs137852789	17,7578470,C,G	G154R	D	D	D	N	D
rs137852789	17,7578470,C,T	G154S	D	N	D	N	D
rs138729528	17,7578407,G,A	R175C	D	D	D	N	D
rs138729528	17,7578407,G,C	R175G	D	D	D	N	D
rs138983188	17,7578181,G,A	P223L	D	D	D	N	D
rs138983188	17,7578181,G,T	P223H	D	D	D	N	D
rs144340710	17,7577577,T,A	N235I	D	D	D	N	D
rs145760222	17,7592153,G,A	V63M	Not found	Not found	Not found	Not found	Not found
rs146340390	17,7578184,G,A	P222L	N	D	N	N	N
rs147002414	17,7578401,G,A	P177S	D	D	D	N	D
rs147002414	17,7578401,G,T	P177T	D	D	D	N	D
rs148924904	17,7578442,T,C	Y163C	D	D	D	N	D
rs149633775	17,7577091,G,A	R283C	D	D	N	N	D
rs149633775	17,7577091,G,C	R283G	D	D	N	N	D
rs149633775	17,7577091,G,T	R283S	N	D	N	N	D
rs150293825	17,7574013,G,C	F338L	D	N	N	N	D
rs193920774	17,7577141,C,A	G266V	D	D	D	N	D
rs193920774	17,7577141,C,T	G266E	D	D	D	N	D
rs193920789	17,7577567,A,C	C238W	D	D	D	N	D
rs193920817	17,7578449,C,T	A161T	N	D	N	N	D
rs200579969	17,7577154,C,A	G262C	D	D	D	N	D
rs200579969	17,7577154,C,T	G262S	D	D	D	N	D
rs201340741	17,7592361,C,A	T132N	Not found	Not found	Not found	Not found	Not found
rs201382018	17,7579882,C,G	E11Q	N	Not found	N	N	N
rs267605076	17,7578177,C,A	E224D	N	N	N	N	N
rs267605077	17,7578530,A,G	F134L	D	N	N	N	D
rs267605077	17,7578530,A,T	F134I	D	D	N	N	D
rs281865547	17,7592602,C,A	F164L	Not found	Not found	Not found	Not found	Not found
rs368771578	17,7579368,A,C	Y107D	D	Not found	N	N	D
rs368771578	17,7579368,A,T	Y107N	D	Not found	N	N	D
rs371409680	17,7577090,C,G	R283P	D	D	D	N	D
rs371409680	17,7577090,C,T	R283H	N	D	N	N	D
rs371524413	17,7578463,C,T	R156H	N	N	N	N	N
rs372613518	17,7577065,C,G	K291N	N	D	N	N	N
rs375444154	17,7574024,G,A	R335C	D	N	N	N	D
rs375874539	17,7577555,G,C	C242W	D	D	D	N	D
rs397514495	17,7578388,C,G	R181P	D	D	D	N	D
rs397516434	17,7573987,G,A	A347V	N	N	N	N	D
rs397516435	17,7578263,G,C	R196G	D	D	D	N	D
rs397516436	17,7578212,G,C	R213G	D	D	D	N	D
rs483352695	17,7577545,T,C	M246V	D	N	N	N	D
rs483352697	17,7578262,C,A	R196L	D	D	D	N	D
rs483352697	17,7578262,C,G	R196P	D	D	D	N	D
rs483352697	17,7578262,C,T	R196Q	D	D	D	N	D
rs530941076	17,7578191,A,C	Y220D	D	D	D	N	D
rs530941076	17,7578191,A,T	Y220N	D	D	D	N	D
rs573154688	17,7574029,C,T	R333H	D	N	N	N	D
rs587778718	17,7578277,G,A	P191L	N	D	N	N	N
rs587778718	17,7578277,G,T	P191H	N	D	N	N	D
rs587778719	17,7578244,C,G	R202P	D	N	D	N	D
rs587778720	17,7578211,C,A	R213L	D	D	D	N	D
rs587778720	17,7578211,C,G	R213P	D	D	D	N	D
rs587778720	17,7578211,C,T	R213Q	D	D	D	N	D
rs587780068	17,7578458,G,A	R158C	D	D	D	N	D
rs587780069	17,7578445,A,C	I162S	D	D	D	N	D
rs587780070	17,7578395,G,A	H179Y	D	D	D	N	D
rs587780070	17,7578395,G,C	H179D	D	D	D	N	D
rs587780070	17,7578395,G,T	H179N	D	D	D	N	D
rs587780071	17,7578269,G,A	L194F	N	D	N	N	D
rs587780072	17,7578245,G,A	R202C	D	D	N	N	D
rs587780072	17,7578245,G,C	R202G	D	N	N	N	D
rs587780073	17,7577580,T,C	Y234C	D	D	D	N	D
rs587780073	17,7577580,T,G	Y234S	D	D	D	N	D
rs587780074	17,7577544,A,C	M246R	D	D	D	N	D
rs587780074	17,7577544,A,G	M246T	D	D	D	N	D
rs587780074	17,7577544,A,T	M246K	D	D	D	N	D
rs587780075	17,7577138,C,G	R267P	D	D	D	N	D
rs587780075	17,7577138,C,T	R267Q	D	D	D	N	D
rs587781288	17,7578508,C,A	C141F	D	D	D	N	D
rs587781288	17,7578508,C,T	C141Y	D	D	D	N	D
rs587781371	17,7579359,G,A	R110C	D	Not found	N	N	D
rs587781371	17,7579359,G,C	R110G	N	Not found	N	N	D
rs587781433	17,7577515,T,C	T256A	D	D	D	N	D
rs587781433	17,7577515,T,G	T256P	D	D	D	N	D
rs587781495	17,7579323,C,T	V122M	N	D	N	N	D
rs587781504	17,7579373,C,A	G105V	D	Not found	D	N	D
rs587781504	17,7579373,C,T	G105D	D	Not found	D	N	D
rs587781525	17,7577096,T,A	D281V	D	D	D	N	D
rs587781525	17,7577096,T,C	D281G	D	D	D	N	D
rs587781525	17,7577096,T,G	D281A	D	D	D	N	D
rs587781589	17,7577586,A,C	I232S	D	D	D	N	D
rs587781589	17,7577586,A,G	I232T	D	D	D	N	D
rs587781642	17,7579350,A,C	F113V	D	Not found	N	N	D
rs587781845	17,7578419,C,T	E171K	D	D	D	N	D
rs587781991	17,7578526,C,A	C135F	D	D	D	N	D
rs587781991	17,7578526,C,T	C135Y	D	D	D	N	D
rs587782082	17,7577536,T,A	R249W	D	D	D	N	D
rs587782082	17,7577536,T,C	R249G	D	D	D	N	D
rs587782144	17,7578457,C,A	R158L	D	D	D	N	D
rs587782144	17,7578457,C,G	R158P	D	D	D	N	D
rs587782144	17,7578457,C,T	R158H	D	D	D	N	D
rs587782160	17,7578539,T,A	N131Y	D	D	N	N	D
rs587782177	17,7578205,C,A	S215I	D	D	D	N	D
rs587782177	17,7578205,C,G	S215T	D	D	D	N	D
rs587782177	17,7578205,C,T	S215N	D	D	D	N	D
rs587782197	17,7578496,A,G	L145P	D	D	D	N	D
rs587782197	17,7578496,A,T	L145Q	D	D	N	N	D
rs587782289	17,7577575,A,C	Y236D		Not found		N	D
rs587782289	17,7577575,A,G	Y236H	D	D	N	N	D
rs587782289	17,7577575,A,T	Y236N	D	D	D	N	D
rs587782329	17,7577535,C,A	R249M	D	D	D	N	D
rs587782329	17,7577535,C,G	R249T	D	D	D	N	D
rs587782329	17,7577535,C,T	R249K	D	D	D	N	D
rs587782447	17,7579367,T,C	Y107C	D	Not found	N	N	D
rs587782447	17,7579367,T,G	Y107S	D	Not found	N	N	D
rs587782461	17,7579365,C,A	G108C	D	Not found	N	N	D
rs587782461	17,7579365,C,G	G108R	D	Not found	N	N	D
rs587782529	17,7574018,G,A	R337C	D	D	N	N	N
rs587782529	17,7574018,G,T	R337S	N	N	N	N	D
rs587782664	17,7577570,C,A	M237I	D	D	D	N	D
rs587782664	17,7577570,C,G	M237I	D	D	D	N	D
rs587782664	17,7577570,C,T	M237I	D	D	D	N	D
rs587782705	17,7578475,G,A	P152L	D	D	D	N	D
rs587782705	17,7578475,G,C	P152R	D	D	D	N	D
rs730881995	17,7579397,A,T	V97D	D	Not found	N	N	D
rs730881996	17,7579343,T,C	H115R	N	Not found	N	N	N
rs730881999	17,7578550,G,A	S127F	D	D	D	N	D
rs730881999	17,7578550,G,C	S127C	D	D	D	N	D
rs730881999	17,7578550,G,T	S127Y	D	D	D	N	D
rs730882000	17,7578455,C,G	A159P	D	D	D	N	D
rs730882000	17,7578455,C,T	A159T	D	D	D	N	D
rs730882003	17,7578242,C,G	V203L	N	N	N	N	N
rs730882003	17,7578242,C,T	V203M	N	N	N	N	N
rs730882004	17,7577572,T,C	M237V	D	D	D	N	D
rs730882005	17,7577568,C,A	C238F	D	D	D	N	D
rs730882005	17,7577568,C,G	C238S	D	D	D	N	D
rs730882005	17,7577568,C,T	C238Y	D	D	D	N	D
rs730882006	17,7577553,A,G	M243T	D	D	D	N	D
rs730882008	17,7577093,C,A	R282L	D	D	D	N	D
rs730882008	17,7577093,C,G	R282P	D	D	D	N	D
rs730882008	17,7577093,C,T	R282Q	D	D	D	N	D
rs730882009	17,7572959,T,C	M384V	N	N	N	N	N
rs730882023	17,7579398,C,A	V97F	N	Not found	N	N	D
rs730882023	17,7579398,C,G	V97L	N	Not found	N	N	N
rs730882025	17,7578203,C,A	V216L	D	D	D	N	D
rs730882025	17,7578203,C,G	V216L	D	D	D	N	D
rs730882025	17,7578203,C,T	V216M	D	D	D	N	D
rs730882026	17,7577574,T,C	Y236C	D	D	D	N	D
rs730882026	17,7577574,T,G	Y236S	D	D	D	N	D
rs730882027	17,7577529,A,C	I251S	D	D	D	N	D
rs730882027	17,7577529,A,G	I251T	D	D	D	N	D
rs730882027	17,7577529,A,T	I251N	D	D	D	N	D
rs730882028	17,7574027,C,A	G334W	D	D	D	N	D
rs730882028	17,7574027,C,G	G334R	D	N	N	N	D
rs730882028	17,7574027,C,T	G334R	D	D	D	N	D
rs746504075	17,7577608,C,T	V225I	N	N	N	N	N
rs747342068	17,7578536,T,C	K132E	D	D	D	N	D
rs747342068	17,7578536,T,G	K132Q	D	D	D	N	D
rs750600586	17,7578517,G,A	A138V	D	D	D	N	D
rs750600586	17,7578517,G,T	A138D	D	D	D	N	D
rs751477326	17,7578400,G,C	P177R	D	D	D	N	D
rs753660142	17,7577100,T,C	R280G	D	D	D	N	D
rs757282628	17,7579886,G,C	S9R	N	Not found	N	N	D
rs758781593	17,7578522,T,A	Q136H	N	D	N	N	D
rs758781593	17,7578522,T,G	Q136H	D	D	D	N	D
rs760043106	17,7578265,A,C	I195S	D	D	D	N	D
rs760043106	17,7578265,A,G	I195T	D	D	D	N	D
rs760043106	17,7578265,A,T	I195N	D	D	D	N	D
rs762846821	17,7578469,C,A	G154V	D	D	D	N	D
rs762846821	17,7578469,C,T	G154D	D	D	D	N	D
rs763098116	17,7577108,C,A	C277F	D	D	D	N	D
rs763098116	17,7577108,C,G	C277S	D	D	D	N	D
rs763098116	17,7577108,C,T	C277Y	D	D	D	N	D
rs764146326	17,7577097,C,A	D281Y	D	D	D	N	D
rs764146326	17,7577097,C,G	D281H	D	D	D	N	D
rs764146326	17,7577097,C,T	D281N	D	D	D	N	D
rs764342812	17,7577561,A,C	S240R	D	D	D	N	D
rs765848205	17,7577571,A,C	M237R	D	D	D	N	D
rs765848205	17,7577571,A,G	M237T	D	D	D	N	D
rs765848205	17,7577571,A,T	M237K	D	D	D	N	D
rs767328513	17,7578476,G,A	P152S	D	D	D	N	D
rs768046010	17,7573979,G,A	L350F	N	N	N	N	N
rs769934890	17,7574030,G,A	R333C	D	D	D	N	D
rs769934890	17,7574030,G,C	R333G	D	N	N	N	D
rs770374782	17,7577070,G,A	R290C	N	D	N	N	D
rs770374782	17,7577070,G,C	R290G	N	N	N	N	N
rs771939956	17,7574023,C,T	R335H	D	N	N	N	D
rs779000871	17,7578421,G,A	T170M	N	D	N	N	N
rs779000871	17,7578421,G,C	T170R	D	D	N	N	D
rs779761818	17,7577512,G,C	L257V	D	D	D	N	D
rs780442292	17,7578529,A,C	F134C	D	D	D	N	D
rs786201057	17,7579313,G,A	T125M	D	D	D	N	D
rs786201057	17,7579313,G,C	T125R	D	D	D	N	D
rs786201057	17,7579313,G,T	T125K	D	D	D	N	D
rs786201059	17,7577082,C,G	E286Q	D	D	D	N	D
rs786201059	17,7577082,C,T	E286K	D	D	D	N	D
rs786201419	17,7578498,C,A	Q144H	N	D	N	N	D
rs786201592	17,7578188,C,T	E221K	D	D	D	N	D
rs786201762	17,7577541,T,A	N247I	D	D	D	N	D
rs786201762	17,7577541,T,C	N247S	D	D	D	N	D
rs786201838	17,7578271,T,A	H193L	D	D	D	N	D
rs786201838	17,7578271,T,C	H193R	D	D	D	N	D
rs786201838	17,7578271,T,G	H193P	D	D	D	N	D
rs786202082	17,7577111,G,C	A276G	D	D	D	N	D
rs786202082	17,7577111,G,T	A276D	D	D	D	N	D
rs786202561	17,7578511,G,T	T140N	D	D	N	N	D
rs786202962	17,7578403,C,A	C176F	D	D	D	N	D
rs786202962	17,7578403,C,T	C176Y	D	D	D	N	D
rs786203071	17,7578499,T,G	Q144P	D	D	N	N	D
rs786203436	17,7578443,A,C	Y163D	D	D	D	N	D
rs786203436	17,7578443,A,G	Y163H	D	D	D	N	D
rs786203436	17,7578443,A,T	Y163N	D	D	D	N	D
rs786204145	17,7577578,T,A	N235Y	D	D	D	N	D
rs863224451	17,7577114,C,A	C275F	D	D	D	N	D
rs863224451	17,7577114,C,G	C275S	D	D	D	N	D
rs863224451	17,7577114,C,T	C275Y	D	D	D	N	D
rs863224683	17,7578542,G,A	L130F	D	D	D	N	D
rs863224683	17,7578542,G,C	L130V	D	D	D	N	D
rs863224685	17,7577087,G,A	T284I	N	N	N	N	D
rs864622115	17,7578410,T,C	R174G	D	D	N	N	D
rs864622237	17,7577581,A,C	Y234D	D	D	D	N	D
rs864622237	17,7577581,A,G	Y234H	D	D	D	N	D
rs864622237	17,7577581,A,T	Y234N	D	D	D	N	D
rs866775781	17,7578534,C,A	K132N	D	D	D	N	D
rs866775781	17,7578534,C,G	K132N	D	D	D	N	D
rs867114783	17,7578427,T,C	H168R	D	D	D	N	D
rs876658468	17,7578272,G,A	H193Y	D	D	D	N	D
rs876658468	17,7578272,G,C	H193D	D	D	D	N	D
rs876658468	17,7578272,G,T	H193N	D	D	D	N	D
rs876658876	17,7572994,T,G	K372T	N	N	N	N	D
rs876659459	17,7573928,T,C	S367G	N	N	N	N	D
rs876659675	17,7577517,A,C	I255S	D	D	D	N	D
rs876659675	17,7577517,A,G	I255T	D	D	N	N	D
rs876659675	17,7577517,A,T	I255N	D	D	D	N	D
rs876659802	17,7577105,G,A	P278L	D	D	D	N	D
rs876659802	17,7577105,G,C	P278R	D	D	D	N	D
rs876659802	17,7577105,G,T	P278H	D	D	D	N	D
rs876660254	17,7578281,G,A	P190S	N	D	D	N	D
rs876660254	17,7578281,G,T	P190T	N	D	D	N	D
rs876660333	17,7577123,A,T	V272E	D	D	D	N	D
rs876660754	17,7578413,C,A	V173L	D	D	D	N	D
rs876660754	17,7578413,C,T	V173M	D	D	D	N	D
rs876660807	17,7577566,T,C	N239D	D	D	D	N	D
rs876660821	17,7578393,A,C	H179Q	D	D	D	N	D
rs876660821	17,7578393,A,T	H179Q	D	D	D	N	D
rs876660825	17,7578280,G,A	P190L	D	D	D	N	D
rs876660825	17,7578280,G,C	P190R	D	D	D	N	D
rs878854070	17,7579875,G,A	P13L	N	Not found	N	N	D
rs878854070	17,7579875,G,C	P13R	N	Not found	N	N	D
rs878854072	17,7578197,C,T	V218M	D	D	D	N	D
rs878854074	17,7577528,G,C	I251M	D	D	D	N	D
rs879253894	17,7578194,G,A	P219S	D	D	D	N	D
rs879253911	17,7578392,C,T	E180K	D	D	N	N	D
rs879253942	17,7577144,A,G	L265P	D	D	D	N	D
rs879254249	17,7578440,T,C	K164E	D	D	D	N	D
rs886039483	17,7578554,A,C	Y126D	D	D	D	N	D
rs886039483	17,7578554,A,T	Y126N	D	D	D	N	D
rs886039484	17,7578206,T,C	S215G	D	D	D	N	D
rs886039484	17,7578206,T,G	S215R	D	D	D	N	D
rs942158624	17,7578266,T,A	I195F	D	D	N	N	D
rs967461896	17,7578404,A,C	C176G	D	D	D	N	D
rs967461896	17,7578404,A,G	C176R	D	D	D	N	D
rs967461896	17,7578404,A,T	C176S	D	D	D	N	D
rs970212462	17,7577604,C,A	G226V	D	D	D	N	D
rs985033810	17,7577550,C,A	G244V	D	D	D	N	D
rs985033810	17,7577550,C,G	G244A	D	D	D	N	D
rs985033810	17,7577550,C,T	G244D	D	D	D	N	D
rs1019340046	17,7577543,C,T	M246I	D	N	N	N	D
rs1057519747	17,7578412,A,C	V173G	D	D	D	N	D
rs1057519747	17,7578412,A,G	V173A	D	D	D	N	D
rs1057519747	17,7578412,A,T	V173E	D	D	D	N	D
rs1057519975	17,7578527,A,C	C135G	D	D	D	N	D
rs1057519975	17,7578527,A,G	C135R	D	D	D	N	D
rs1057519975	17,7578527,A,T	C135S	D	D	D	N	D
rs1057519976	17,7578525,G,C	C135W	D	D	D	N	D
rs1057519977	17,7578507,G,C	C141W	D	D	D	N	D
rs1057519978	17,7578509,A,C	C141G	D	D	D	N	D
rs1057519978	17,7578509,A,G	C141R	D	D	D	N	D
rs1057519980	17,7578402,G,C	C176W	D	D	D	N	D
rs1057519981	17,7577569,A,C	C238G	Not found	Not found	Not found	N	D
rs1057519981	17,7577569,A,G	C238R	Not found	Not found	Not found	N	D
rs1057519981	17,7577569,A,T	C238S	Not found	Not found	Not found	N	D
rs1057519982	17,7577557,A,C	C242G	D	D	D	N	D
rs1057519982	17,7577557,A,G	C242R	D	D	D	N	D
rs1057519982	17,7577557,A,T	C242S	D	D	D	N	D
rs1057519983	17,7577115,A,G	C275R	D	D	D	N	D
rs1057519984	17,7577095,G,C	D281E	D	D	D	N	D
rs1057519984	17,7577095,G,T	D281E	D	D	D	N	D
rs1057519985	17,7577081,T,A	E286V	D	D	D	N	D
rs1057519985	17,7577081,T,C	E286G	D	D	D	N	D
rs1057519985	17,7577081,T,G	E286A	D	D	D	N	D
rs1057519986	17,7577129,A,C	F270C	D	D	D	N	D
rs1057519986	17,7577129,A,G	F270S	D	D	D	N	D
rs1057519987	17,7577128,A,C	F270L	D	D	D	N	N
rs1057519988	17,7577130,A,G	F270L	D	D	D	N	D
rs1057519988	17,7577130,A,T	F270I	D	D	D	N	D
rs1057519989	17,7577551,C,A	G244C	D	D	D	N	D
rs1057519989	17,7577551,C,G	G244R	D	D	D	N	D
rs1057519989	17,7577551,C,T	G244S	D	D	D	N	D
rs1057519990	17,7577142,C,G	G266R	D	D	D	N	D
rs1057519990	17,7577142,C,T	G266R	D	D	D	N	D
rs1057519991	17,7578394,T,A	H179L	D	D	D	N	D
rs1057519991	17,7578394,T,C	H179R	D	D	D	N	D
rs1057519991	17,7578394,T,G	H179P	D	D	D	N	D
rs1057519992	17,7578208,T,A	H214L	D	D	D	N	D
rs1057519992	17,7578208,T,C	H214R	D	D	D	N	D
rs1057519992	17,7578208,T,G	H214P	D	D	D	N	D
rs1057519996	17,7578535,T,A	K132M	D	D	D	N	D
rs1057519996	17,7578535,T,C	K132R	D	D	N	N	D
rs1057519996	17,7578535,T,G	K132T	D	D	D	N	D
rs1057519997	17,7579355,A,C	L111R	D	Not found	N	N	D
rs1057519997	17,7579355,A,G	L111P	D	Not found	D	N	D
rs1057519997	17,7579355,A,T	L111Q	D	Not found	N	N	D
rs1057519998	17,7578268,A,C	L194R	D	D	D	N	D
rs1057519998	17,7578268,A,G	L194P	D	D	D	N	D
rs1057519998	17,7578268,A,T	L194H	D	D	D	N	D
rs1057519999	17,7577565,T,C	N239S	D	D	D	N	D
rs1057519999	17,7577565,T,G	N239T	D	D	D	N	D
rs1057520000	17,7578478,G,C	P151R	D	D	D	N	D
rs1057520000	17,7578478,G,T	P151H	D	D	D	N	D
rs1057520001	17,7578204,A,C	S215R	D	D	D	N	D
rs1057520002	17,7577560,A,C	S241A	D	D	D	N	D
rs1057520002	17,7577560,A,G	S241P	D	D	D	N	D
rs1057520003	17,7579314,T,G	T125P	D	D	D	N	D
rs1057520004	17,7578202,A,C	V216G	D	D	D	N	D
rs1057520004	17,7578202,A,T	V216E	D	D	D	N	D
rs1057520005	17,7577118,C,A	V274F	D	D	D	N	D
rs1057520006	17,7577117,A,C	V274G	D	D	D	N	D
rs1057520006	17,7577117,A,G	V274A	D	D	N	N	D
rs1057520006	17,7577117,A,T	V274D	D	D	D	N	D
rs1057520007	17,7578235,T,A	Y205F	D	N	N	N	D
rs1057520007	17,7578235,T,C	Y205C	D	D	D	N	D
rs1057520007	17,7578235,T,G	Y205S	D	D	D	N	D
rs1057520008	17,7578236,A,C	Y205D	D	D	D	N	D
rs1057520008	17,7578236,A,G	Y205H	D	D	D	N	D
rs1057520008	17,7578236,A,T	Y205N	D	D	D	N	D
rs1057522275	17,7577564,G,C	N239K	D	D	D	N	D
rs1057523496	17,7579362,A,C	F109V	D	Not found	D	N	D
rs1060501191	17,7577127,C,T	E271K	D	D	D	N	D
rs1060501193	17,7573985,A,C	L348V	N	N	N	N	D
rs1060501195	17,7579374,C,G	G105R	D	Not found	D	N	D
rs1060501195	17,7579374,C,T	G105S	D	Not found	D	N	D
rs1060501198	17,7578218,T,C	T211A	D	N	N	N	D
rs1060501198	17,7578218,T,G	T211P	D	D	D	N	D
rs1060501201	17,7577508,T,C	E258G	D	D	D	N	D
rs1060501201	17,7577508,T,G	E258A	D	D	D	N	D
rs1060501208	17,7579876,G,A	P13S	N	Not found	N	N	D
rs1060501209	17,7578379,T,C	D184G	N	N	N	N	N
rs1064793881	17,7577102,C,T	G279E	D	D	D	N	D
rs1064794141	17,7579334,G,A	T118I	D	D	D	N	D
rs1064794311	17,7577532,G,A	P250L	D	D	D	N	D
rs1064794810	17,7576876,C,A	D324Y	D	D	N	N	D
rs1064794810	17,7576876,C,G	D324H	D	N	N	N	D
rs1064794810	17,7576876,C,T	D324N	N	N	N	N	D
rs1064795203	17,7578398,G,C	H178D	D	D	D	N	D
rs1064795369	17,7577109,A,C	C277G	D	D	D	N	D
rs1064795369	17,7577109,A,G	C277R	D	D	D	N	D
rs1064795691	17,7578448,G,T	A161D	D	D	D	N	D
rs1064796257	17,7578384,G,C	C182W	N	D	N	N	D
rs1064796401	17,7574014,A,C	F338C	D	D	N	N	D
rs1064796401	17,7574014,A,G	F338S	D	N	N	N	D
rs1064796722	17,7579361,A,C	F109C	D	Not found	N	N	D
rs1064796722	17,7579361,A,G	F109S	D	Not found	D	N	D
rs1131691013	17,7578541,A,G	L130P	D	D	D	N	D
rs1131691013	17,7578541,A,T	L130H	D	D	D	N	D
rs1131691021	17,7578415,A,C	V172G	D	D	D	N	D
rs1131691021	17,7578415,A,G	V172A	N	D	N	N	D
rs1131691023	17,7578460,A,G	V157A	N	N	N	N	D
rs1131691023	17,7578460,A,T	V157D	D	D	D	N	D
rs1131691025	17,7577153,C,A	G262V	D	D	D	N	D
rs1131691026	17,7578492,C,A	W146C	D	D	D	N	D
rs1131691028	17,7578178,T,C	E224G	D	N	N	N	D
rs1131691028	17,7578178,T,G	E224A	N	N	N	N	N
rs1131691029	17,7577112,C,G	A276P	D	D	D	N	D
rs1131691029	17,7577112,C,T	A276T	D	D	D	N	D
rs1131691034	17,7578438,C,G	K164N	D	D	D	N	D
rs1131691037	17,7578538,T,A	N131I	D	D	N	N	D
rs1131691043	17,7578416,C,A	V172F	D	D	N	N	D
rs1131691043	17,7578416,C,T	V172I	N	N	N	N	N
rs1192921623	17,7572932,C,A	D393Y	N	D	N	N	D
rs1192921623	17,7572932,C,G	D393H	N	N	N	N	D
rs1192921623	17,7572932,C,T	D393N	N	N	N	N	D
rs1204379654	17,7577088,T,G	T284P	D	D	N	N	D
rs1212996409	17,7578515,T,C	K139E	D	D	D	N	D
rs1237829645	17,7574011,T,A	E339V	D	N	N	N	D
rs1237829645	17,7574011,T,C	E339G	D	N	N	N	D
rs1245723119	17,7579394,G,A	P98L	D	Not found	N	N	D
rs1319163924	17,7578430,T,G	Q167P	D	N	D	N	D
rs1330865474	17,7577520,A,C	I254S	D	D	D	N	D
rs1420675064	17,7578193,G,A	P219L	D	D	D	N	D
rs1464727668	17,7578226,T,A	D208V	D	D	D	N	D
rs1464727668	17,7578226,T,C	D208G	D	D	D	N	D
rs1482497533	17,7579878,G,T	P12H	N	Not found	N	N	D
rs1555524130	17,7572976,G,C	S378C	N	D	N	N	N
rs1555524394	17,7573973,C,A	D352Y	D	D	N	N	D
rs1555525248	17,7577103,C,T	G279R	D	D	D	N	D
rs1555525279	17,7577113,A,C	C275W	D	D	D	N	D
rs1555525353	17,7577147,A,G	L264P	D	D	D	N	D
rs1555525465	17,7577523,G,T	T253N	D	D	D	N	D
rs1555525564	17,7577589,G,A	T231I	D	D	D	N	D
rs1555525743	17,7578196,A,C	V218G	D	D	D	N	D
rs1555525857	17,7578253,C,A	G199V	D	D	D	N	D
rs1555525857	17,7578253,C,T	G199E	D	D	D	N	D
rs1555526001	17,7578396,G,T	H178Q	N	D	D	N	D
rs1555526004	17,7578397,T,G	H178P	D	D	D	N	D
rs1555526131	17,7578454,G,A	A159V	D	D	D	N	D
rs1555526214	17,7578484,G,A	S149F	D	D	D	N	N
rs1555526214	17,7578484,G,C	S149C	N	D	N	N	D
rs1555526241	17,7578502,A,C	V143G	N	D	N	N	D
rs1555526241	17,7578502,A,G	V143A	N	D	N	N	D
rs1555526268	17,7578524,G,C	Q136E	N	N	N	N	D
rs1555526335	17,7578553,T,C	Y126C	D	D	D	N	D
rs1555526486	17,7579319,G,A	T123I	D	N	N	N	D
rs1555526506	17,7579332,C,G	A119P	D	D	D	N	D
rs1555526518	17,7579338,C,T	G117R	D	D	D	N	D
rs1555526589	17,7579380,A,G	Y103H	D	Not found	N	N	D
rs1567540133	17,7572936,G,C	D391E	N	N	N	N	D
rs1567541975	17,7573982,C,G	E349Q	D	N	N	N	D
rs1567542019	17,7573991,C,T	E346K	D	N	N	N	D
rs1567547687	17,7577098,T,G	R280S	D	D	D	N	D
rs1567549584	17,7577563,T,G	S240R	D	D	D	N	D
rs1567551121	17,7578187,T,G	E221A	D	D	D	N	D
rs1567551903	17,7578259,A,C	V197G	D	D	D	N	D
rs1567551903	17,7578259,A,T	V197E	D	D	D	N	D
rs1567553114	17,7578424,A,C	M169R	D	D	N	N	D
rs1567554121	17,7578513,C,A	K139N	D	D	D	N	D
rs1567554216	17,7578523,T,G	Q136P	D	D	N	N	D
rs1567555667	17,7579349,A,C	F113C	D	Not found	N	N	D
rs1567555667	17,7579349,A,G	F113S	D	Not found	N	N	D
rs1567556019	17,7579391,G,A	S99F	D	Not found	N	N	D
rs1567556019	17,7579391,G,C	S99C	D	Not found	N	N	D
rs1567558112	17,7579873,G,C	L14V	N	Not found	N	N	N
rs1597345314	17,7572952,T,C	K386R	N	N	N	N	N
rs1597349147	17,7573988,C,T	A347T	N	N	N	N	D
rs1597349348	17,7574008,A,T	M340K	D	N	N	N	D
rs1597359140	17,7576857,A,G	L330P	D	D	D	N	D
rs1597359175	17,7576863,A,G	F328S	D	N	N	N	D
rs1597362155	17,7577133,T,G	S269R	D	D	N	N	D
rs1597362182	17,7577136,T,A	N268Y	N	N	N	N	D
rs1597364185	17,7577524,T,C	T253A	N	N	N	N	N
rs1597365543	17,7577605,C,T	G226S	D	N	D	N	D
rs1597368376	17,7578227,C,G	D208H	D	D	D	N	D
rs1597368777	17,7578270,A,T	H193Q	D	D	D	N	D
rs1597371187	17,7578506,G,A	P142S	D	D	D	N	D
rs1597371253	17,7578512,T,C	T140A	D	N	N	N	D
rs1597371657	17,7578547,G,A	P128L	N	N	N	N	D
rs1597371694	17,7578551,A,T	S127T	D	D	D	N	D
rs1597376489	17,7579865,C,G	Q16H	N	Not found	N	N	D
rs376125064	17,7592120,C,T	R52W	Not found	Not found	Not found	Not found	Not found
rs755238756	17,7579337,C,G	G117A	N	D	N	N	D
rs755238756	17,7579337,C,T	G117E	D	D	D	N	D
rs764681311	17,7592552,T,G	Y148D	Not found	Not found	Not found	Not found	Not found
rs779196500	17,7578505,G,A	P142L	D	D	D	N	D
rs909643864	17,7577039,G,T	P300H	N	D	N	N	D
rs923100890	17,7578230,C,T	D207N	D	N	N	N	N
rs976099760	17,7592174,G,T	G70W	Not found	Not found	Not found	Not found	Not found
rs1177881399	17,7576875,T,C	D324G	D	N	N	N	D
rs1210571334	17,7592030,C,T	P22S	Not found	Not found	Not found	Not found	Not found
rs1213207387	17,7592573,C,G	R155G	Not found	Not found	Not found	Not found	Not found
rs1236942884	17,7592631,G,T	G174V	Not found	Not found	Not found	Not found	Not found
rs1257126093	17,7592588,T,C	S160P	Not found	Not found	Not found	Not found	Not found
rs1260903787	17,7578238,T,C	E204G	D	N	N	N	D
rs1286563734	17,7574026,C,T	G334E	D	N	N	N	D
rs1365861429	17,7592621,T,C	F171L	Not found	Not found	Not found	Not found	Not found
rs1387092550	17,7592390,G,C	G142R	Not found	Not found	Not found	Not found	Not found
rs1452189221	17,7577542,T,C	N247D	D	D	D	N	D
rs1453167097	17,7578490,A,C	V147G	D	D	D	N	D
rs1485252109	17,7592594,T,C	S162P	Not found	Not found	Not found	Not found	D
rs1597365411	17,7577590,T,G	T231P	D	D	D	N	D
rs1597365431	17,7577593,T,G	T230P	D	D	D	N	D
